# Supplementary material for: Triterpene Glycosides from the Far Eastern Sea Cucumber Psolus chitonoides: Chemical Structures and Cytotoxicities of Chitonoidosides E1, F, G, and H
Source: MDPI journal article supplement (doi:10.3390/md19120696), 2021-12-07
Supplement: s1 [file s1]

## Supplementary data content page

Title: **Triterpene Glycosides from the Far Eastern Sea Cucumber *Psolus chitonoides*: Chemical Structures and Cytotoxicities of Chitonoidosides E<sub>1</sub>, F, G, and H.**

**Authors:** Alexandra S. Silchenko<sup>1</sup>, Anatoly I. Kalinovskiy<sup>1</sup>, Sergey A. Avilov<sup>1</sup>, Pelageya V. Andrijaschenko<sup>1</sup>, Roman S. Popov<sup>1</sup>, Ekaterina A. Chingizova<sup>1</sup>, Vladimir I. Kalinin<sup>1</sup> and Dmitrenok P.S.<sup>1</sup>

**Address:** <sup>1</sup>G.B. Elyakov Pacific Institute of Bioorganic Chemistry, Far Eastern Branch of Russian Academy of Sciences, Pr. 100-let Vladivostoka 159, 690022 Vladivostok, Russia

**Correspondence** kalininv@piboc.dvo.ru; Tel.: +7-423-231-1168; paveldmt@piboc.dvo.ru

### Content:

Figure S1. The <sup>13</sup>C NMR (125.67 MHz) spectrum of chitonoidoside E<sub>1</sub> (**1**) in C<sub>5</sub>D<sub>5</sub>N/D<sub>2</sub>O (4/1)

Figure S2. The <sup>1</sup>H NMR (500.12 MHz) spectrum of chitonoidoside E<sub>1</sub> (**1**) in C<sub>5</sub>D<sub>5</sub>N/D<sub>2</sub>O (4/1)

Figure S3. The COSY (500.12 MHz) spectrum of chitonoidoside E<sub>1</sub> (**1**) in C<sub>5</sub>D<sub>5</sub>N/D<sub>2</sub>O (4/1)

Figure S4. The HSQC (500.12 MHz) spectrum of chitonoidoside E<sub>1</sub> (**1**) in C<sub>5</sub>D<sub>5</sub>N/D<sub>2</sub>O (4/1)

Figure S5. The ROESY (500.12 MHz) spectrum of chitonoidoside E<sub>1</sub> (**1**) in C<sub>5</sub>D<sub>5</sub>N/D<sub>2</sub>O (4/1)

Figure S6. The HMBC (500.12 MHz) spectrum of chitonoidoside E<sub>1</sub> (**1**) in C<sub>5</sub>D<sub>5</sub>N/D<sub>2</sub>O (4/1)

Figure S7. 1 D TOCSY (500.12 MHz) spectra of Xyl1, Qui2, Xyl3, MeGlc4, Glc5 and MeXyl6 of chitonoidoside E<sub>1</sub> (**1**) in C<sub>5</sub>D<sub>5</sub>N/D<sub>2</sub>O (4/1)

Figure S8. HR-ESI-MS and ESI-MS/MS spectra of chitonoidoside E<sub>1</sub> (**1**)

Table S1. <sup>13</sup>C and <sup>1</sup>H NMR chemical shifts, HMBC and ROESY correlations of aglycone moiety of chitonoidoside E<sub>1</sub> (**1**)

Figure S9. The <sup>13</sup>C NMR (125.67 MHz) spectrum of chitonoidoside F (**2**) in C<sub>5</sub>D<sub>5</sub>N/D<sub>2</sub>O (4/1)

Figure S10. The <sup>1</sup>H NMR (500.12 MHz) spectrum of chitonoidoside F (**2**) in C<sub>5</sub>D<sub>5</sub>N/D<sub>2</sub>O (4/1)

Figure S11. The COSY (500.12 MHz) spectrum of chitonoidoside F (**2**) in C<sub>5</sub>D<sub>5</sub>N/D<sub>2</sub>O (4/1)

Figure S12. The HSQC (500.12 MHz) spectrum of chitonoidoside F (**2**) in C<sub>5</sub>D<sub>5</sub>N/D<sub>2</sub>O (4/1)

Figure S13. The HMBC (500.12 MHz) spectrum of chitonoidoside F (**2**) in C<sub>5</sub>D<sub>5</sub>N/D<sub>2</sub>O (4/1)

Figure S14. The ROESY (500.12 MHz) spectrum of chitonoidoside F (**2**) in C<sub>5</sub>D<sub>5</sub>N/D<sub>2</sub>O (4/1)

Figure S15. 1D TOCSY (500.12 MHz) spectra of Xyl1, Qui2, Glc3 and MeGlc4 of chitonoidoside F (**2**) in C<sub>5</sub>D<sub>5</sub>N/D<sub>2</sub>O (4/1).

Figure S16. HR-ESI-MS and ESI-MS/MS spectra of chitonoidoside F (**2**)

Table S2.  $^{13}\text{C}$  and  $^1\text{H}$  NMR chemical shifts, HMBC and ROESY correlations of the aglycone part of chitonoidoside F (**2**)

Figure S17. The  $^{13}\text{C}$  NMR (125.67 MHz) spectrum of chitonoidoside G (**3**) in  $\text{C}_5\text{D}_5\text{N}/\text{D}_2\text{O}$  (4/1)

Figure S18. The  $^1\text{H}$  NMR (500.12 MHz) spectrum of chitonoidoside G (**3**) in  $\text{C}_5\text{D}_5\text{N}/\text{D}_2\text{O}$  (4/1)

Figure S19. The COSY (500.12 MHz) spectrum of chitonoidoside G (**3**) in  $\text{C}_5\text{D}_5\text{N}/\text{D}_2\text{O}$  (4/1)

Figure S20. The HSQC (500.12 MHz) spectrum of chitonoidoside G (**3**) in  $\text{C}_5\text{D}_5\text{N}/\text{D}_2\text{O}$  (4/1)

Figure S21. The HMBC (500.12 MHz) spectrum of chitonoidoside G (**3**) in  $\text{C}_5\text{D}_5\text{N}/\text{D}_2\text{O}$  (4/1)

Figure S22. The ROESY (500.12 MHz) spectrum of chitonoidoside G (**3**) in  $\text{C}_5\text{D}_5\text{N}/\text{D}_2\text{O}$  (4/1)

Figure S23. 1D TOCSY (500.12 MHz) spectra of Xyl1, Qui2, Xyl3, MeGlc4, Glc5 and MeGlc6 of chitonoidoside G (**3**) in  $\text{C}_5\text{D}_5\text{N}/\text{D}_2\text{O}$  (4/1)

Figure S24. HR-ESI-MS and ESI-MS/MS spectra of chitonoidoside G (**3**)

Figure S25. The  $^{13}\text{C}$  NMR (125.67 MHz) spectrum of chitonoidoside H (**4**) in  $\text{C}_5\text{D}_5\text{N}/\text{D}_2\text{O}$  (4/1)

Figure S26. The  $^1\text{H}$  NMR (500.12 MHz) spectrum of chitonoidoside H (**4**) in  $\text{C}_5\text{D}_5\text{N}/\text{D}_2\text{O}$  (4/1)

Figure S27. The COSY (500.12 MHz) spectrum of chitonoidoside H (**4**) in  $\text{C}_5\text{D}_5\text{N}/\text{D}_2\text{O}$  (4/1)

Figure S28. The HSQC (500.12 MHz) spectrum of chitonoidoside H (**4**) in  $\text{C}_5\text{D}_5\text{N}/\text{D}_2\text{O}$  (4/1)

Figure S29. The ROESY (500.12 MHz) spectrum of chitonoidoside H (**4**) in  $\text{C}_5\text{D}_5\text{N}/\text{D}_2\text{O}$  (4/1)

Figure S30. The HMBC (500.12 MHz) spectrum of chitonoidoside H (**4**) in  $\text{C}_5\text{D}_5\text{N}/\text{D}_2\text{O}$  (4/1)

Figure S31. 1D TOCSY (500.12 MHz) spectra of Xyl1, Qui2, Xyl3, Glc4 and MeGlc5 of chitonoidoside H (**4**) in  $\text{C}_5\text{D}_5\text{N}/\text{D}_2\text{O}$  (4/1)

Figure S32. 2D TOCSY (500.12 MHz) spectrum of chitonoidoside H (**4**) in  $\text{C}_5\text{D}_5\text{N}/\text{D}_2\text{O}$  (4/1)

Figure S33. HR-ESI-MS and ESI-MS/MS spectra of chitonoidoside H (**4**)

Table S3.  $^{13}\text{C}$  and  $^1\text{H}$  NMR chemical shifts, HMBC and ROESY correlations of the aglycone part of chitonoidoside H (**4**)

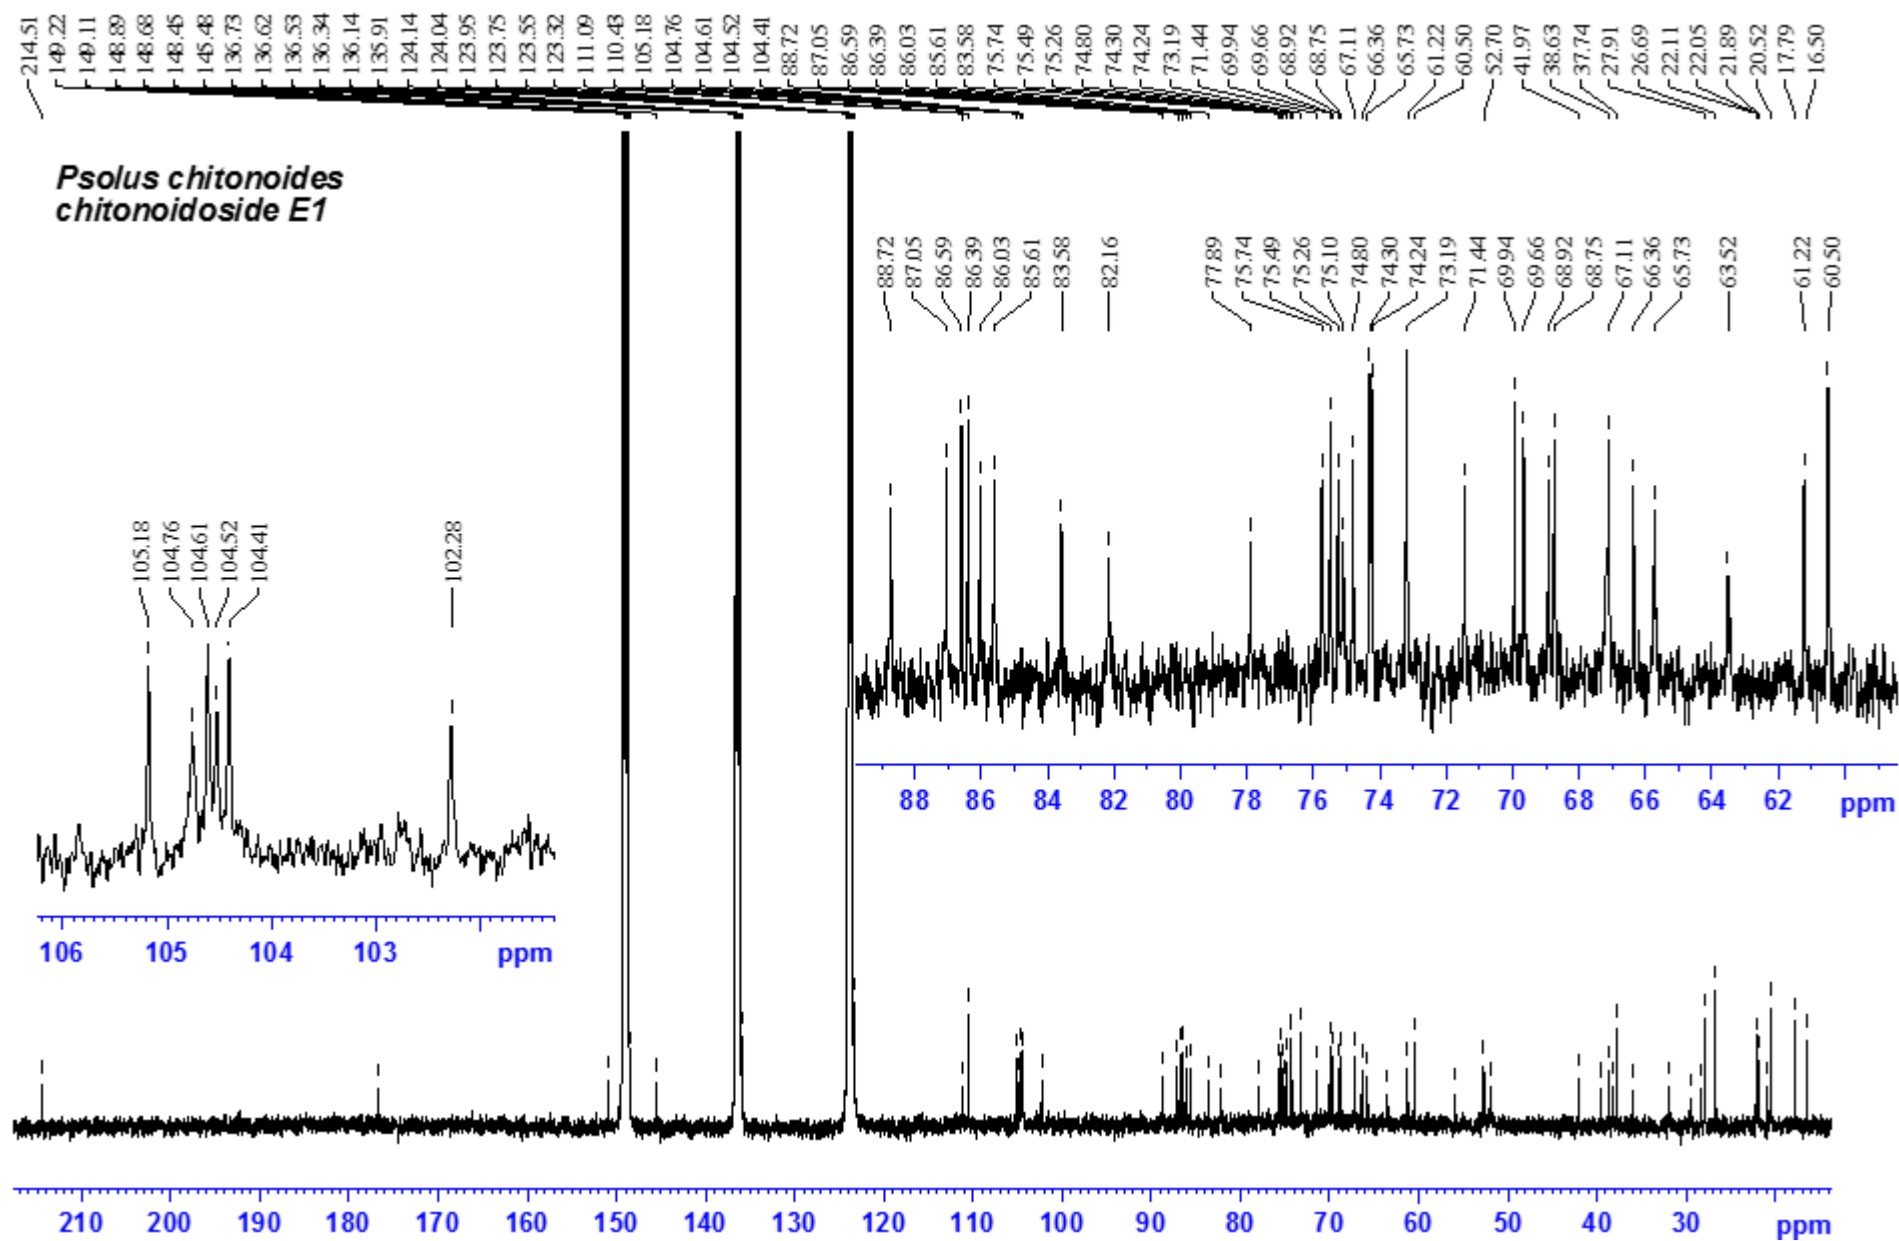

**Figure S1.** The  $^{13}\text{C}$  NMR (125.67 MHz) spectrum of chitonoidoside E<sub>1</sub> (**1**) in  $\text{C}_5\text{D}_5\text{N}/\text{D}_2\text{O}$  (4/1)

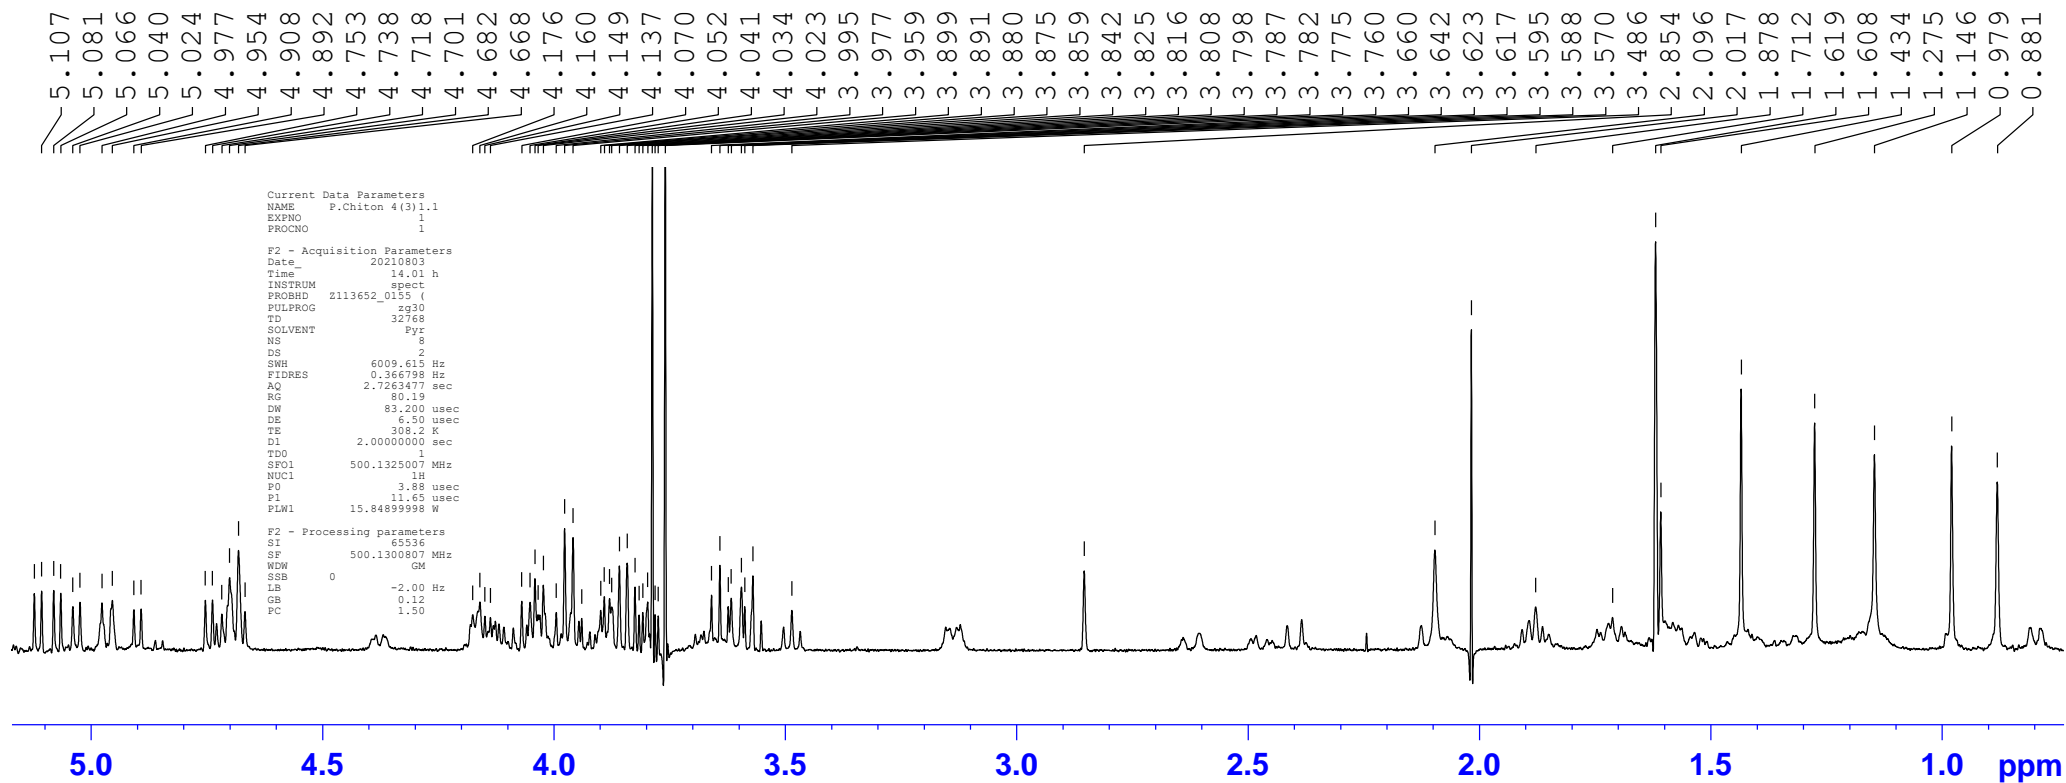

**Figure S2.** The  $^1\text{H}$  NMR (500.12 MHz) spectrum of chitonoidoside E<sub>1</sub> (**1**) in  $\text{C}_5\text{D}_5\text{N}/\text{D}_2\text{O}$  (4/1)

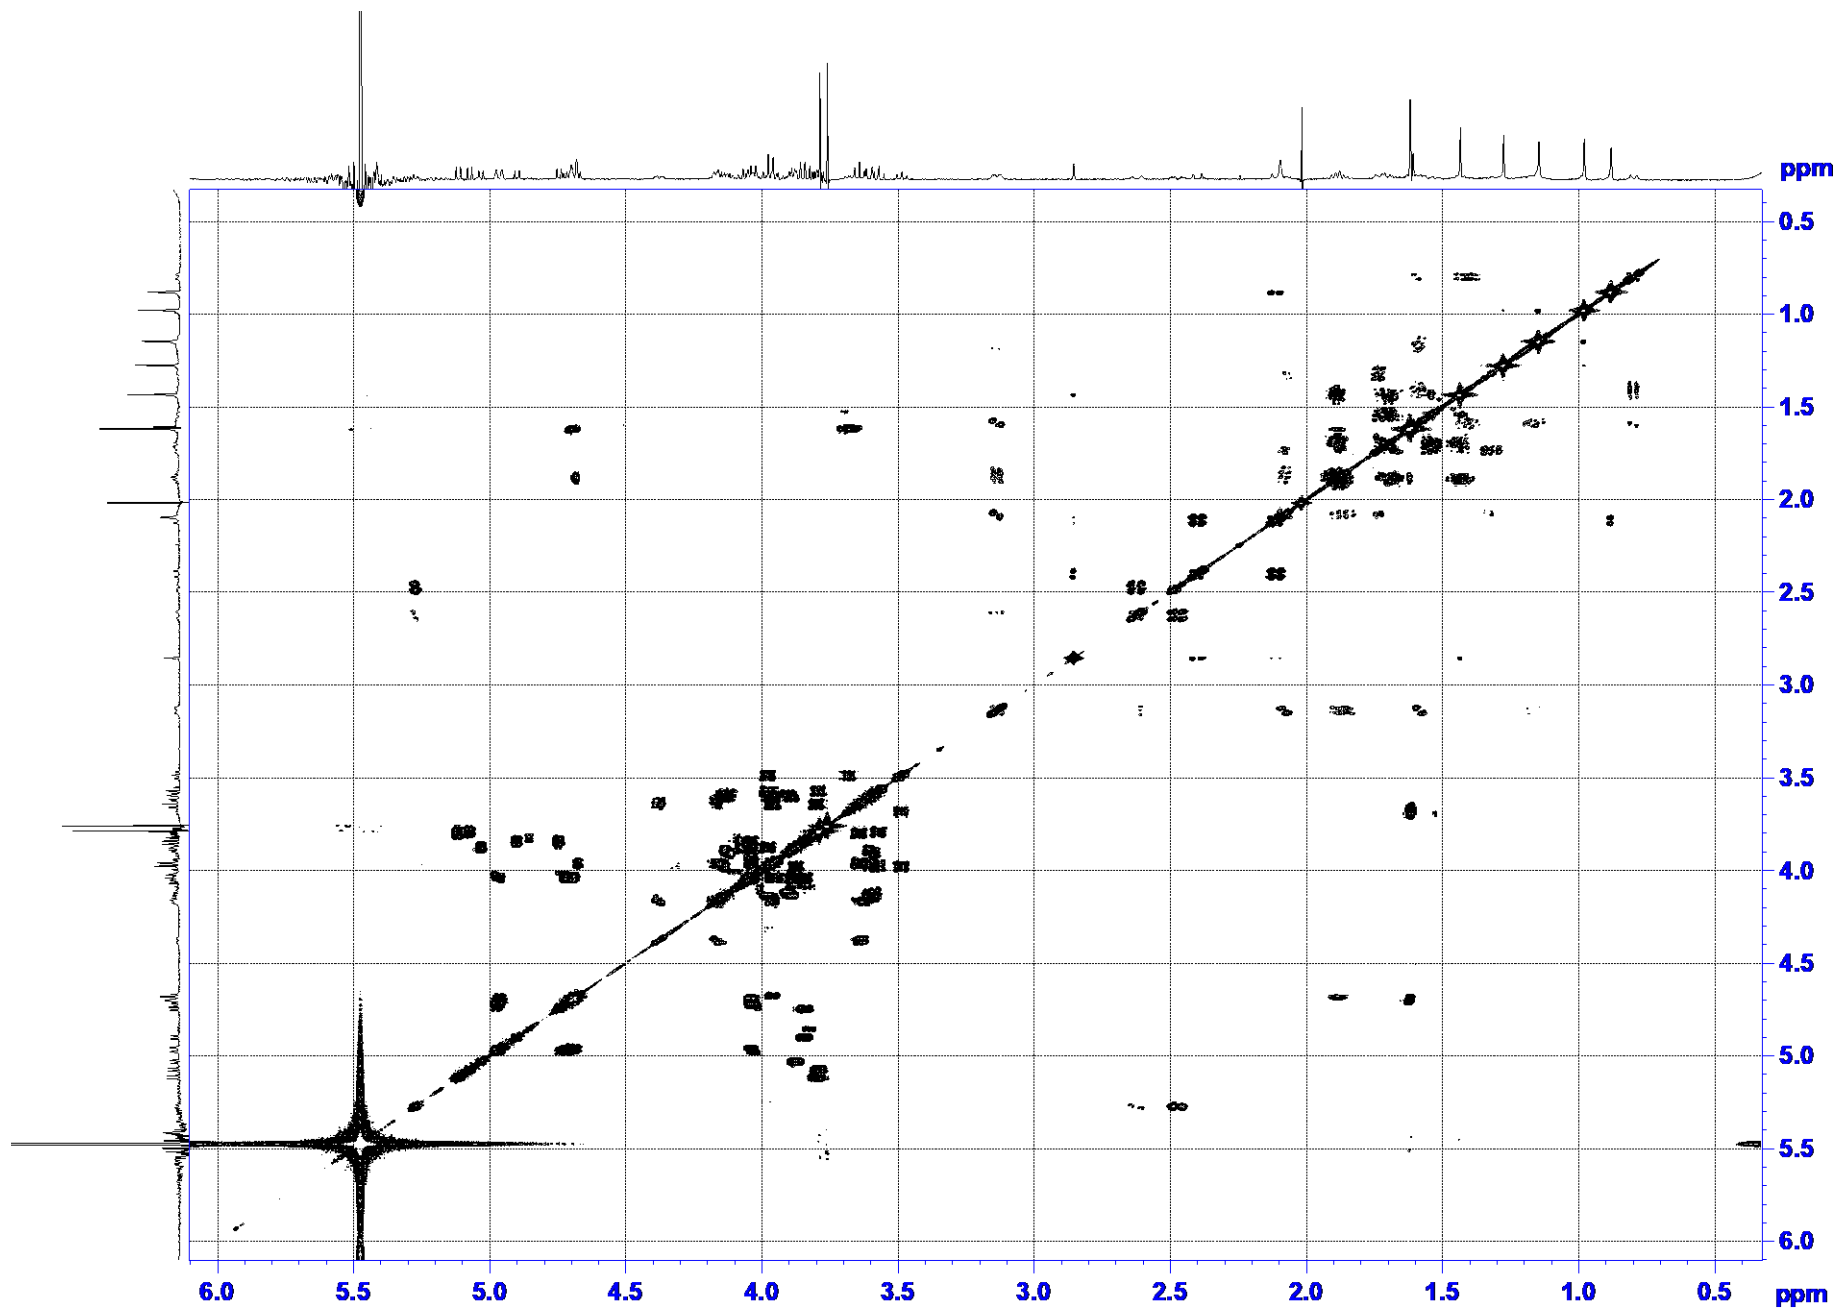

Figure S3. The COSY (500.12 MHz) spectrum of chitonoidoside E<sub>1</sub> (**1**) in C<sub>5</sub>D<sub>5</sub>N/D<sub>2</sub>O (4/1)

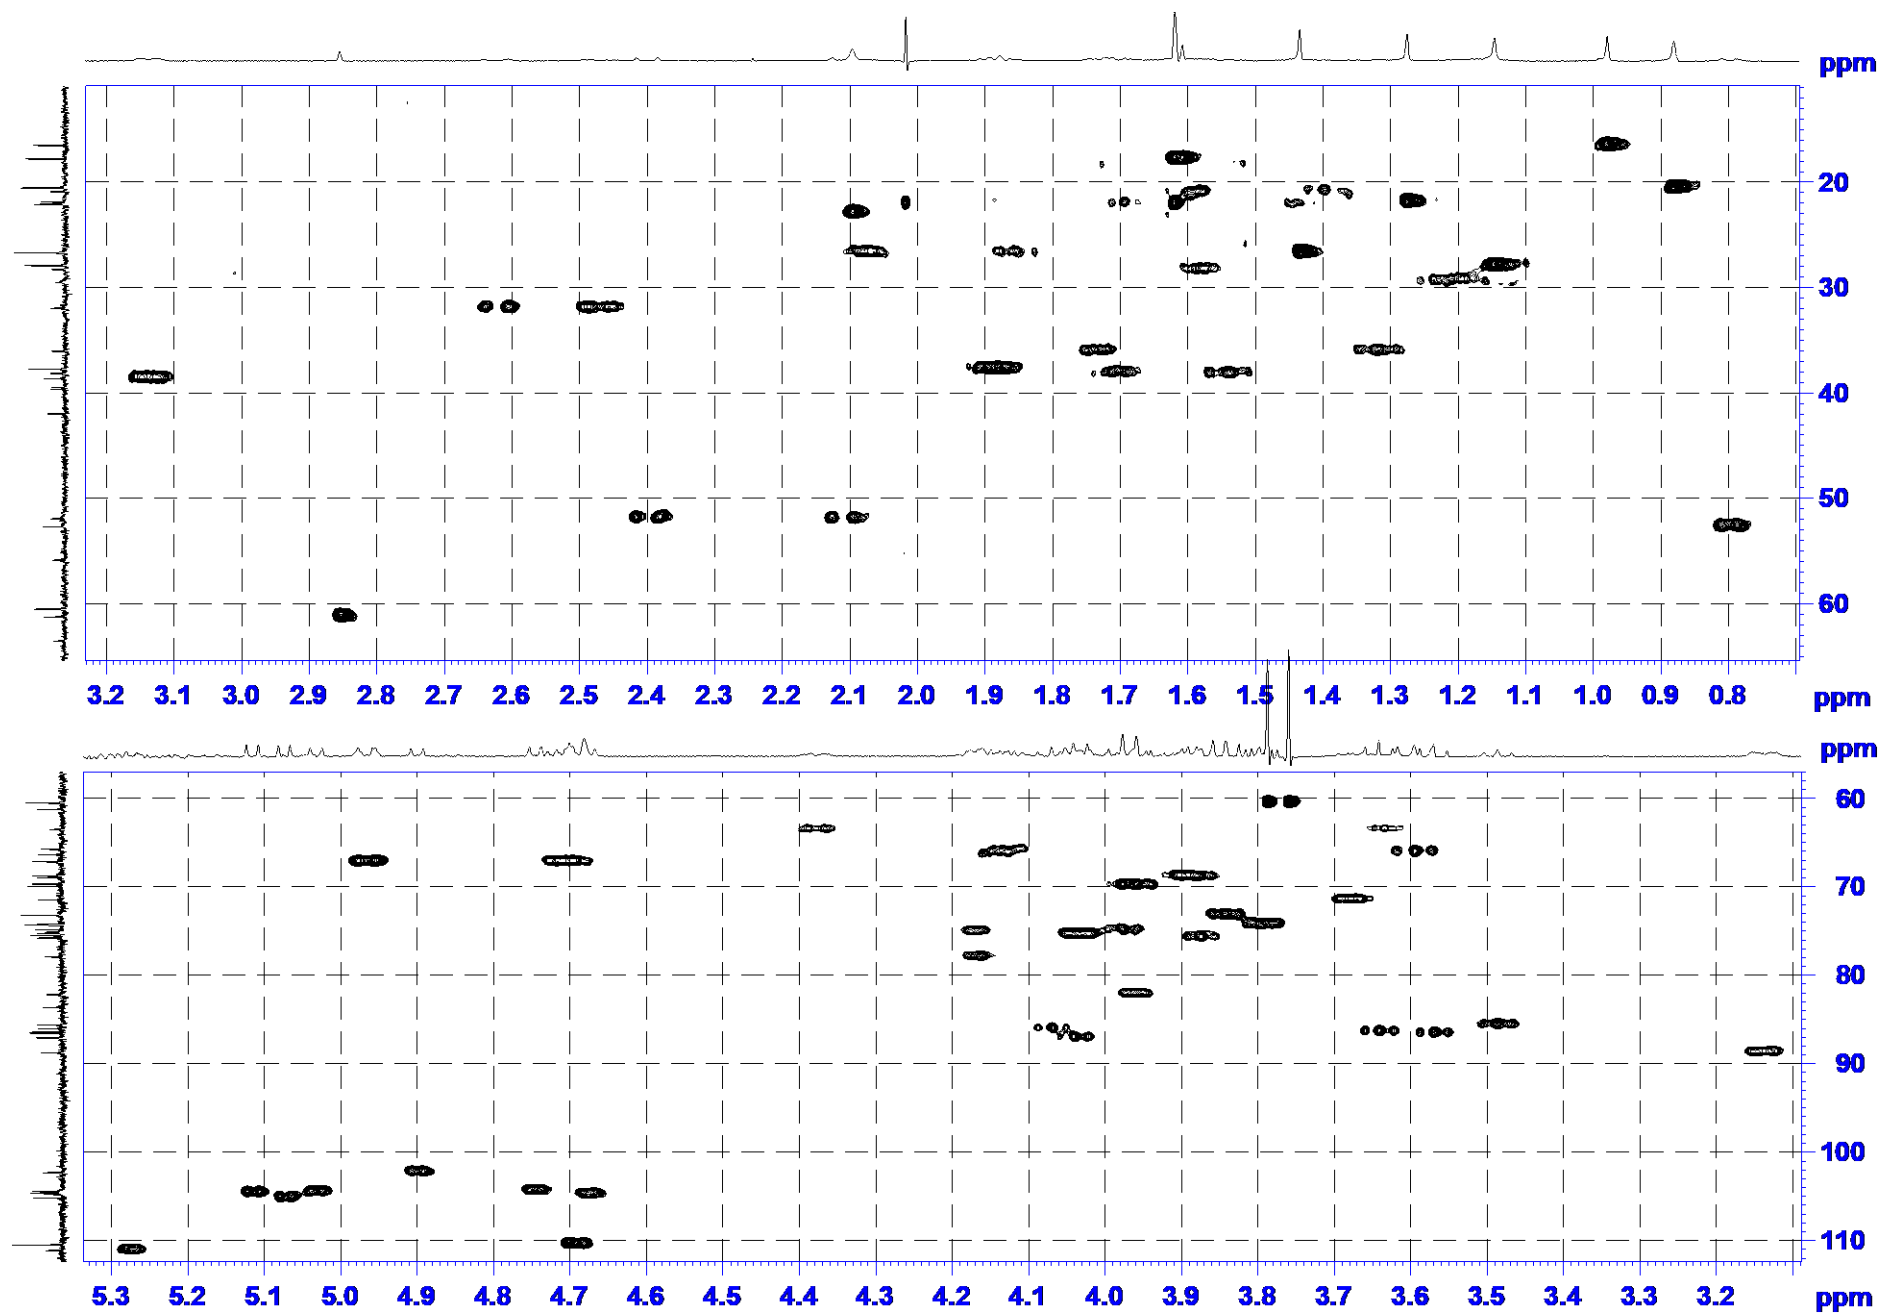

Figure S4. The HSQC (500.12 MHz) spectrum of chitonoidoside E<sub>1</sub> (1) in C<sub>5</sub>D<sub>5</sub>N/D<sub>2</sub>O (4/1)

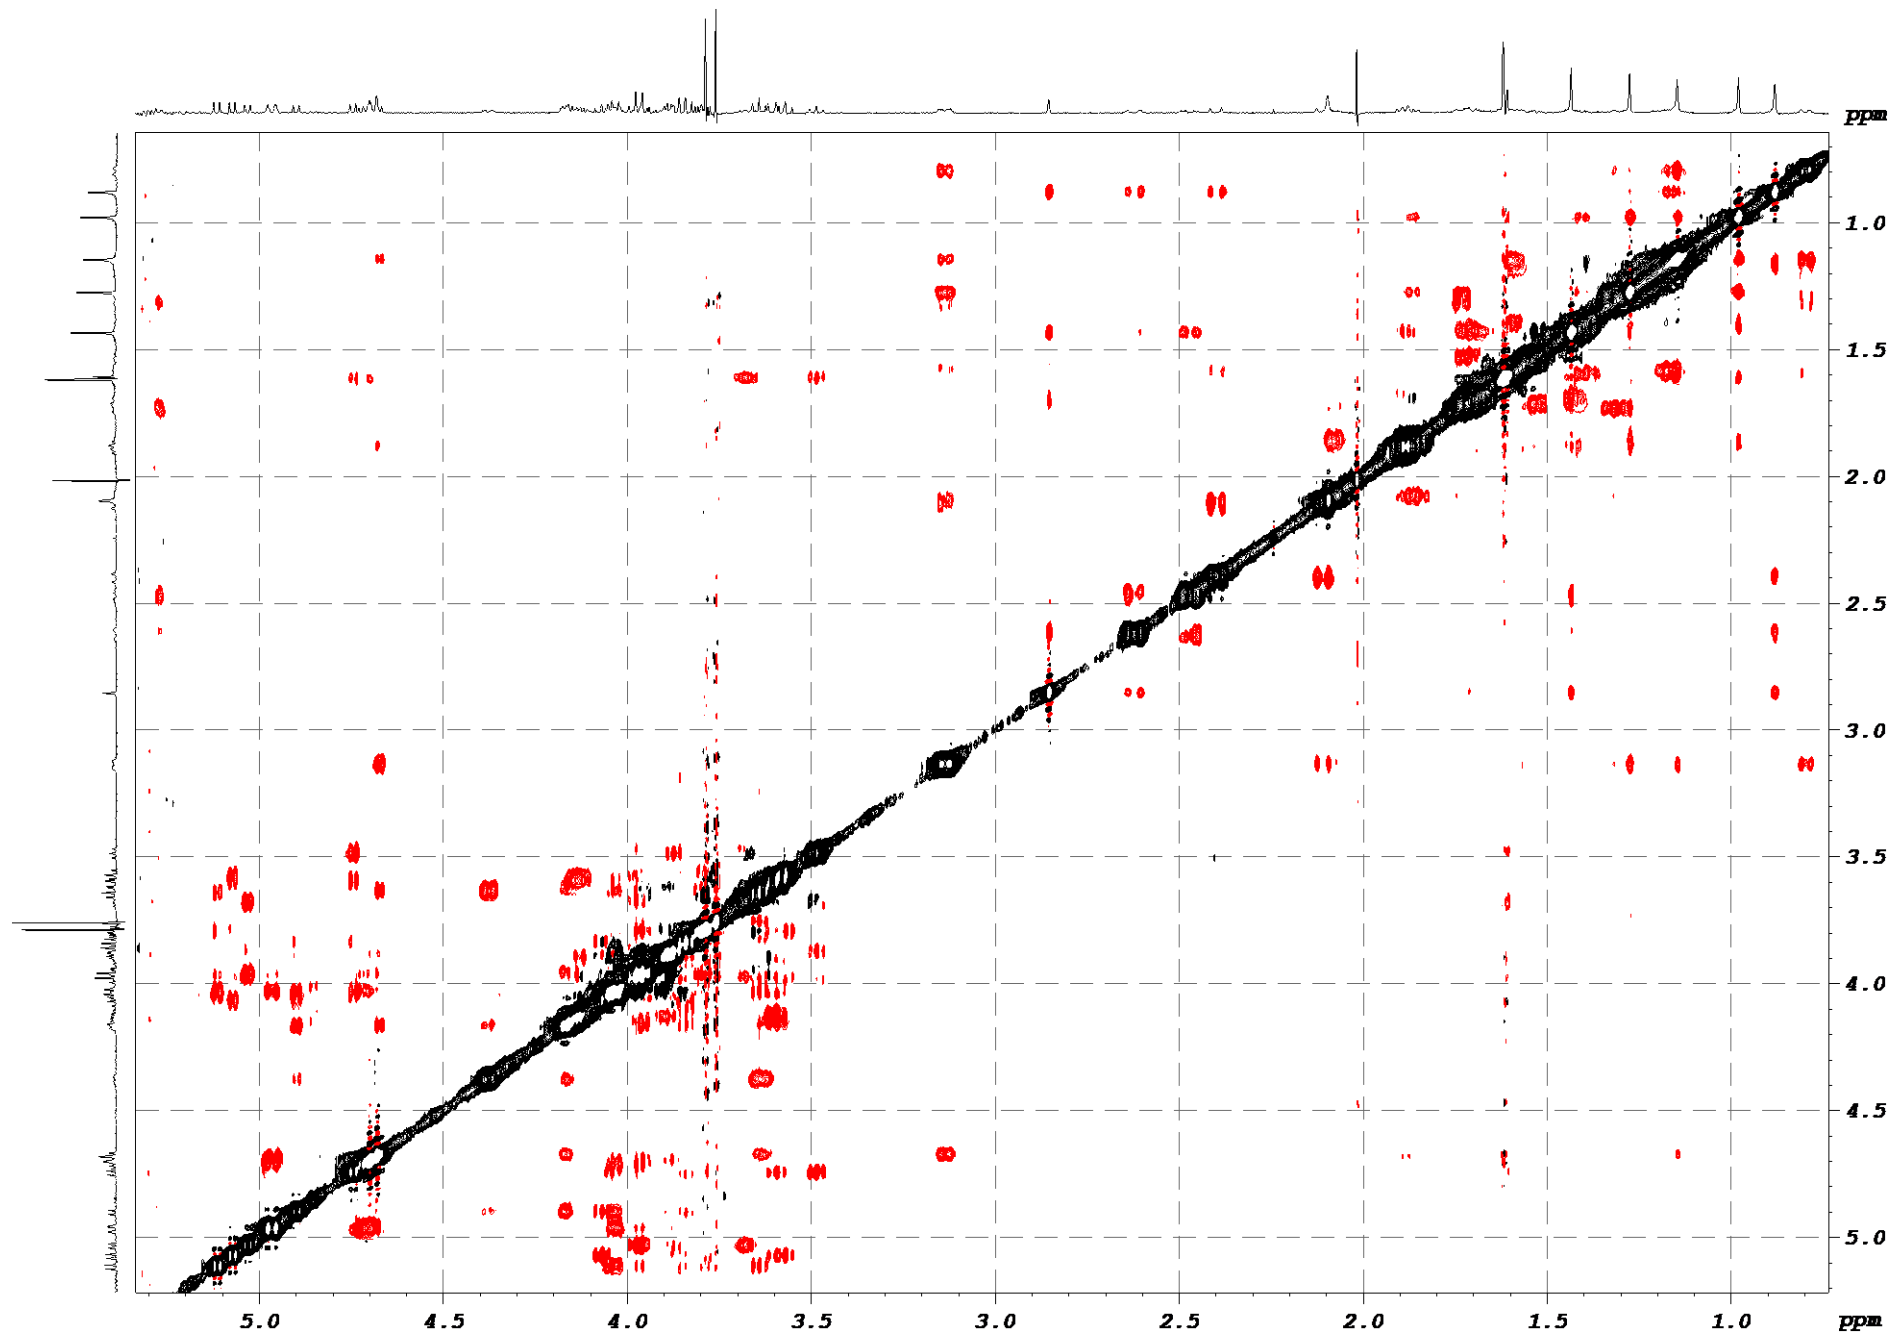

**Figure S5.** The ROESY (500.12 MHz) spectrum of chitonoidoside E<sub>1</sub> (**1**) in C<sub>5</sub>D<sub>5</sub>N/D<sub>2</sub>O (4/1)

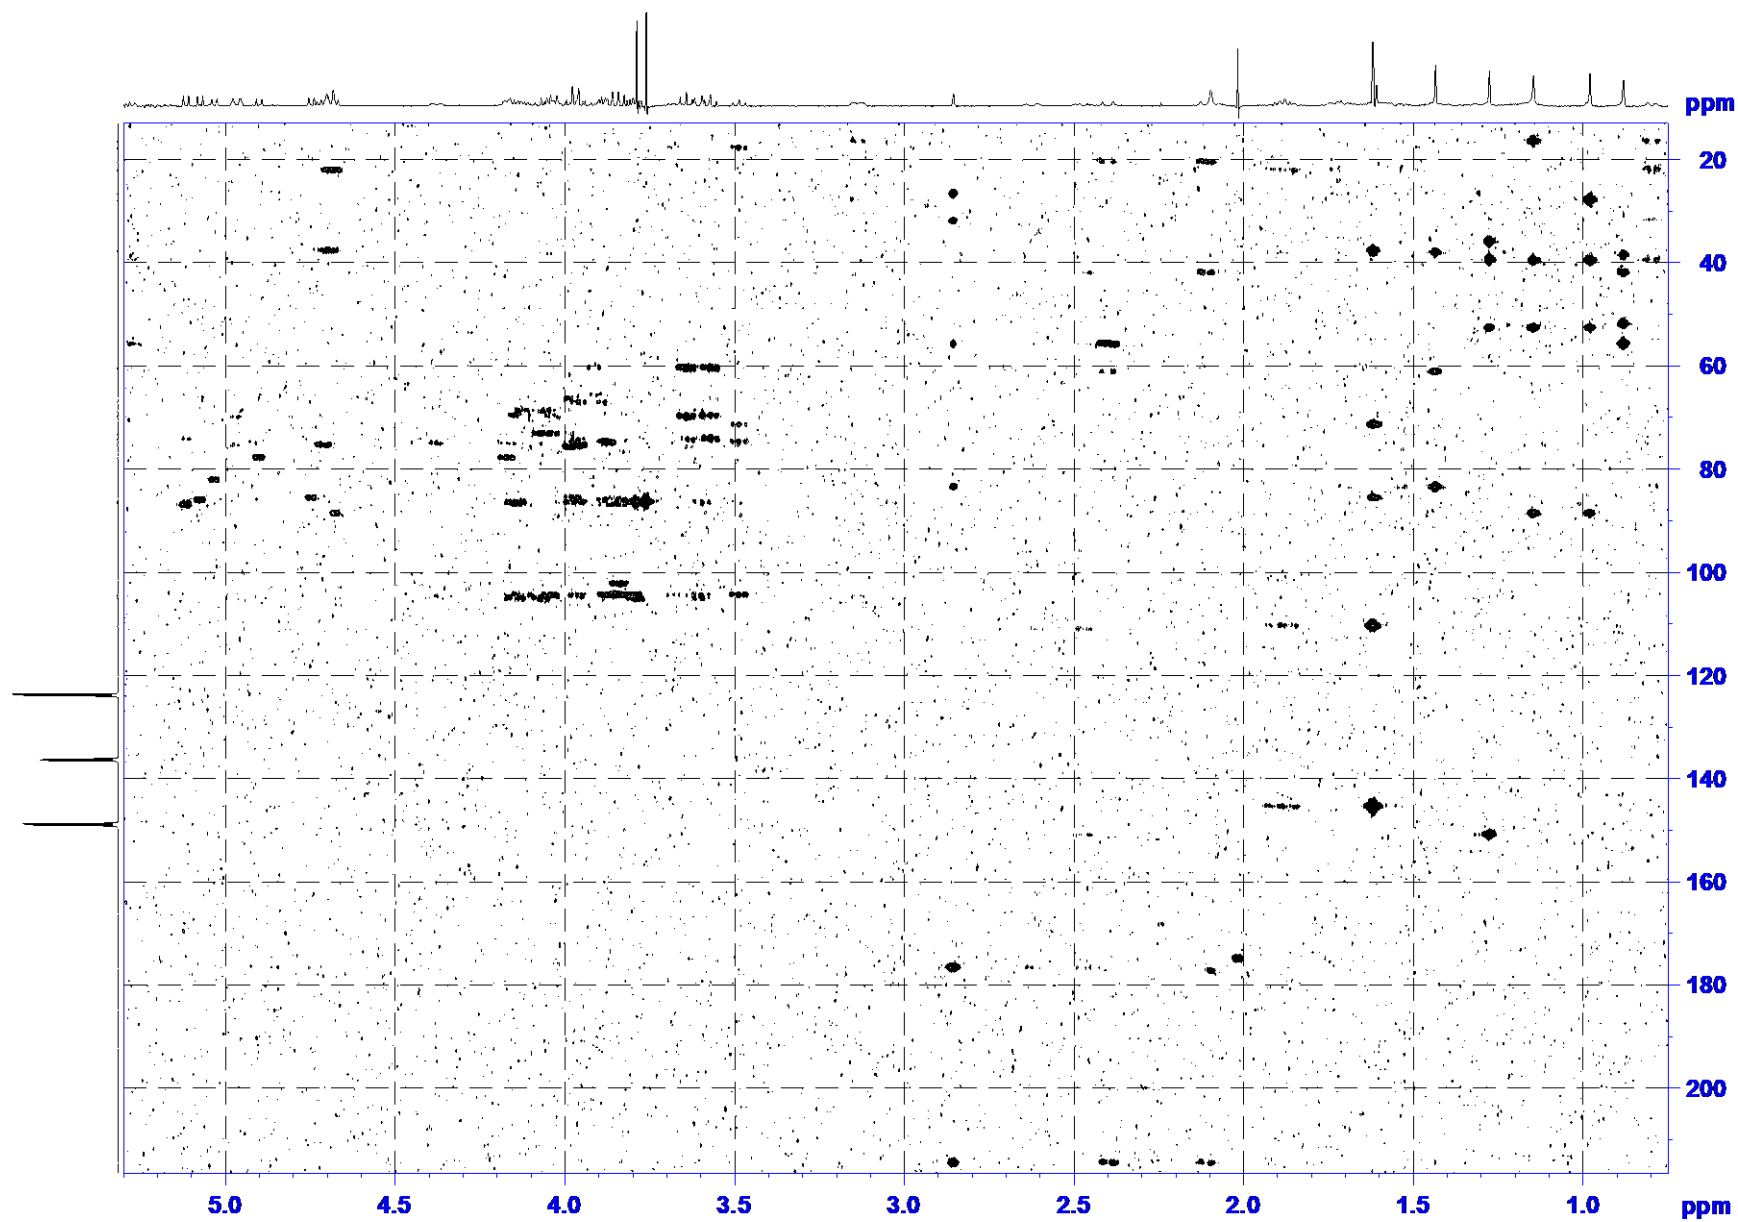

**Figure S6.** The HMBC (500.12 MHz) spectrum of chitonoidoside E<sub>1</sub> (**1**) in C<sub>5</sub>D<sub>5</sub>N/D<sub>2</sub>O (4/1)



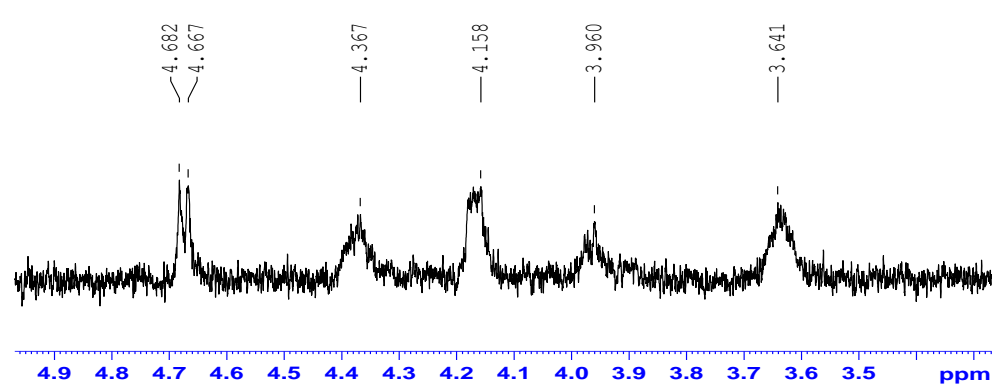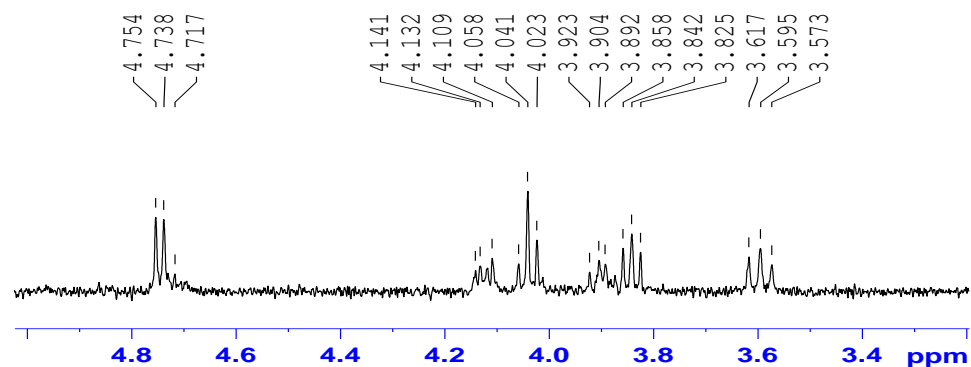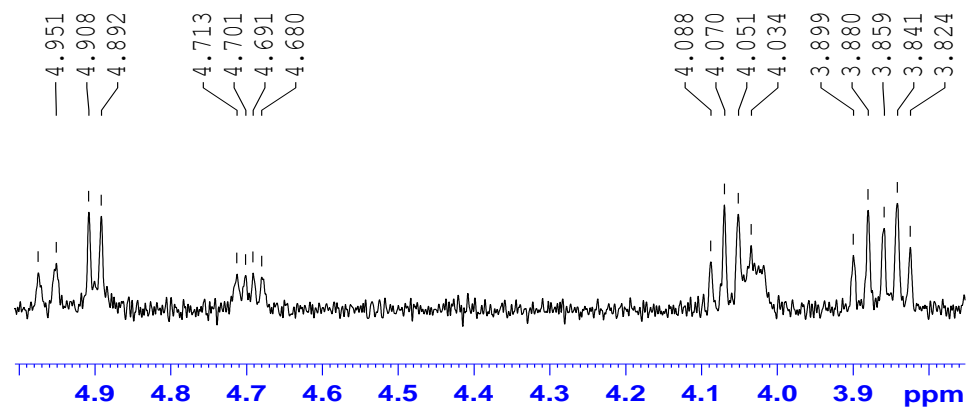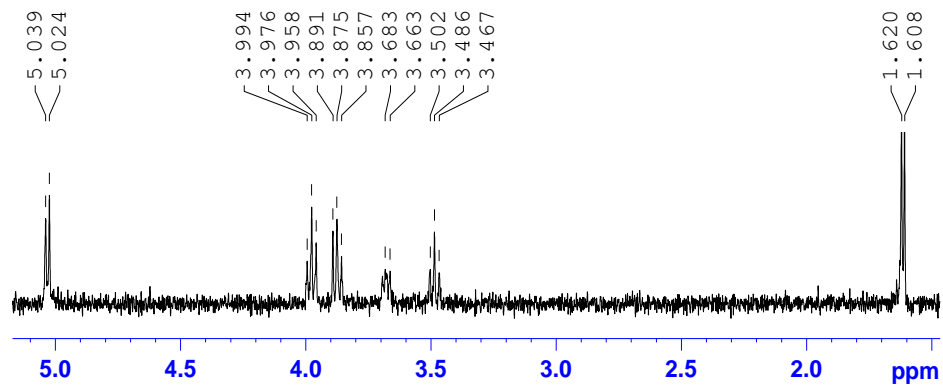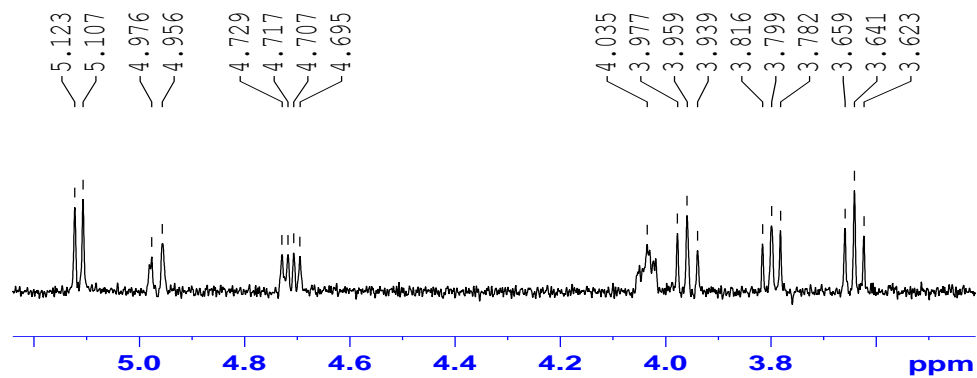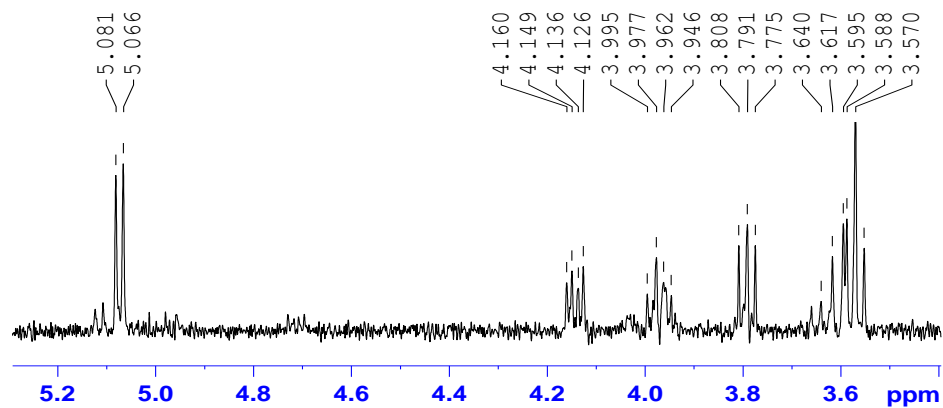

**Figure S7.** 1 D TOCSY (500.12 MHz) spectra of Xyl1, Qui2, Xyl3, MeGlc4, Glc5 and MeXyl6 of chitonoidoside E<sub>1</sub> (**1**) in C<sub>5</sub>D<sub>5</sub>N/D<sub>2</sub>O (4/1)

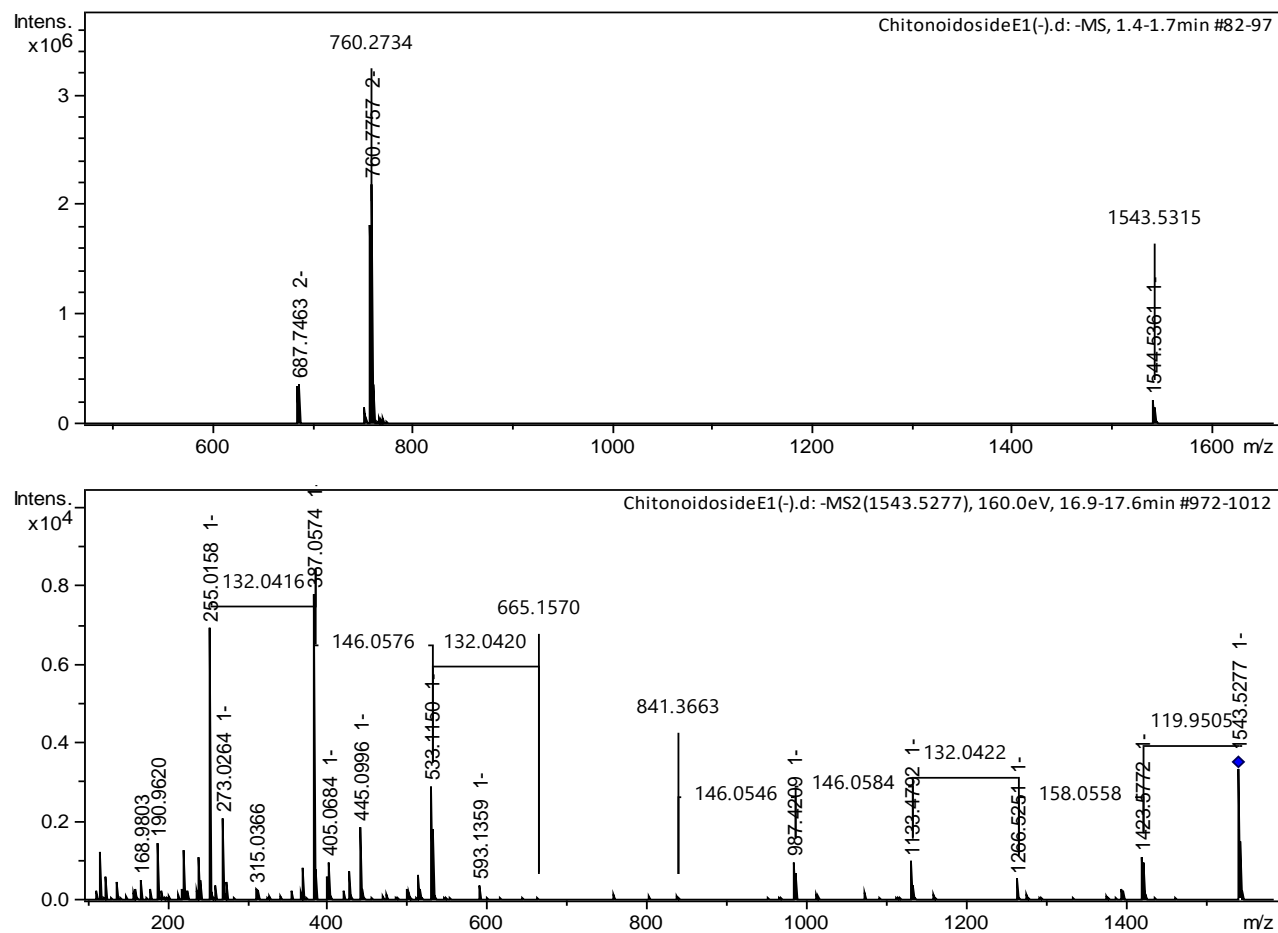

**Figure S8.** HR-ESI-MS (-) and ESI-MS/MS (-) spectra of chitonoidoside E<sub>1</sub> (**1**)

**Table S1.** <sup>13</sup>C and <sup>1</sup>H NMR chemical shifts and HMBC and ROESY correlations of aglycone moiety of chitonoidoside E<sub>1</sub> (**1**).

| Position | $\delta_C$ mult. <sup>a</sup> | $\delta_H$ mult. (J in Hz) <sup>b</sup> | HMBC                                     | ROESY                        |
|----------|-------------------------------|-----------------------------------------|------------------------------------------|------------------------------|
| 1        | 36.0 CH <sub>2</sub>          | 1.73 m<br>1.32 m                        |                                          | H-11, H-19<br>H-3, H-5, H-11 |
| 2        | 27.0 CH <sub>2</sub>          | 2.08 m<br>1.86 m                        |                                          | H-19, H-30                   |
| 3        | 88.7 CH                       | 3.14 dd (4.1; 11.9)                     | C: 4, 30, 31, C:1 Xyl1                   | H-1, H-5, H-31, H1-Xyl1      |
| 4        | 39.5 C                        |                                         |                                          |                              |
| 5        | 52.7 CH                       | 0.79 brd (11.6)                         | C: 6, 10, 19, 30                         | H-1, H-3, H-31               |
| 6        | 20.9 CH <sub>2</sub>          | 1.59 m<br>1.40 m                        |                                          | H-31<br>H-19, H-30           |
| 7        | 28.3 CH <sub>2</sub>          | 1.58 m<br>1.12 m                        |                                          | H-32                         |
| 8        | 38.6 CH                       | 3.14 m                                  |                                          | H-6, H-19                    |
| 9        | 151.0 C                       |                                         |                                          |                              |
| 10       | 39.6 C                        |                                         |                                          |                              |
| 11       | 111.1 CH                      | 5.28 m                                  | C: 8, 10, 12, 13                         | H-1                          |
| 12       | 32.0 CH <sub>2</sub>          | 2.62 d (16.6)<br>2.47 dd (5.0; 16.6)    | C: 9, 11, 13, 18<br>C: 9, 11, 13, 14, 18 | H-17, H-32                   |
| 13       | 55.8 C                        |                                         |                                          |                              |
| 14       | 42.0 C                        |                                         |                                          |                              |
| 15       | 51.9 CH <sub>2</sub>          | 2.40 d (15.7)<br>2.11 d (15.7)          | C: 13, 16, 17, 32<br>C: 8, 14, 16, 32    | H-7, H-32                    |
| 16       | 214.5 C                       |                                         |                                          |                              |
| 17       | 61.2 CH                       | 2.86 s                                  | C: 12, 13, 16, 18, 20, 21                | H-21, H-32                   |
| 18       | 177.7 C                       |                                         |                                          |                              |
| 19       | 21.9 CH <sub>3</sub>          | 1.28 s                                  | C: 1, 5, 9, 10                           | H-1, H-2, H-8, H-30          |
| 20       | 83.6 C                        |                                         |                                          |                              |
| 21       | 26.7 CH <sub>3</sub>          | 1.44 s                                  | C: 17, 20, 22                            | H-12, H-17                   |
| 22       | 38.1 CH <sub>2</sub>          | 1.70 m<br>1.54 m                        | C: 20, 21, 23<br>C: 17, 20, 21, 23       |                              |
| 23       | 22.0 CH <sub>2</sub>          | 1.71 m<br>1.45 m                        |                                          |                              |
| 24       | 37.7 CH <sub>2</sub>          | 1.88 m                                  | C: 22, 25, 26, 27                        | H-21                         |
| 25       | 145.5 C                       |                                         |                                          |                              |
| 26       | 110.4 CH <sub>2</sub>         | 4.70 brs<br>4.68 brs                    | C: 24, 27<br>C: 24, 27                   |                              |
| 27       | 22.1 CH <sub>3</sub>          | 1.62 s                                  | C: 24, 25, 26                            |                              |
| 30       | 16.5 CH <sub>3</sub>          | 0.98 s                                  | C: 3, 4, 5, 31                           | H-31                         |
| 31       | 27.9 CH <sub>3</sub>          | 1.15 s                                  | C: 3, 4, 5, 30                           | H-3, H-5, H-30               |
| 32       | 20.5 CH <sub>3</sub>          | 0.88 s                                  | C: 8, 13, 14, 15                         | H-7, H-12, H-17              |

<sup>a</sup> Recorded at 125.67 MHz in C<sub>5</sub>D<sub>5</sub>N. <sup>b</sup> Recorded at 500.12 MHz in C<sub>5</sub>D<sub>5</sub>N.

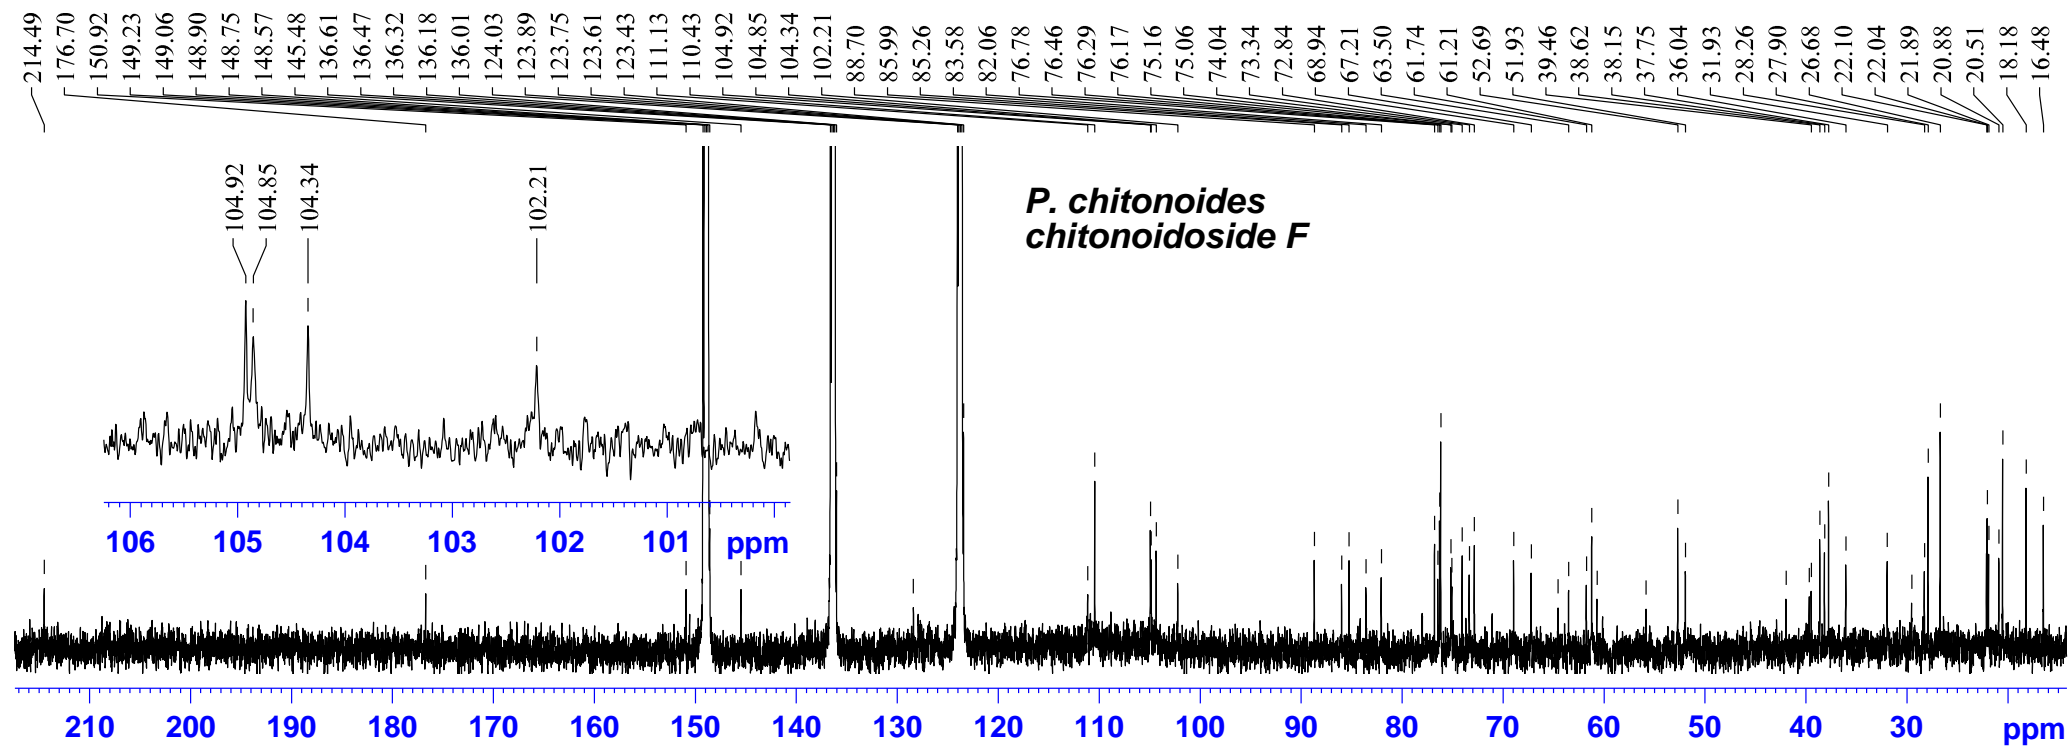

Figure S9. The  $^{13}\text{C}$  NMR (125.67 MHz) spectrum of chitonoidoside F (2) in  $\text{C}_5\text{D}_5\text{N}/\text{D}_2\text{O}$   
(4/1)

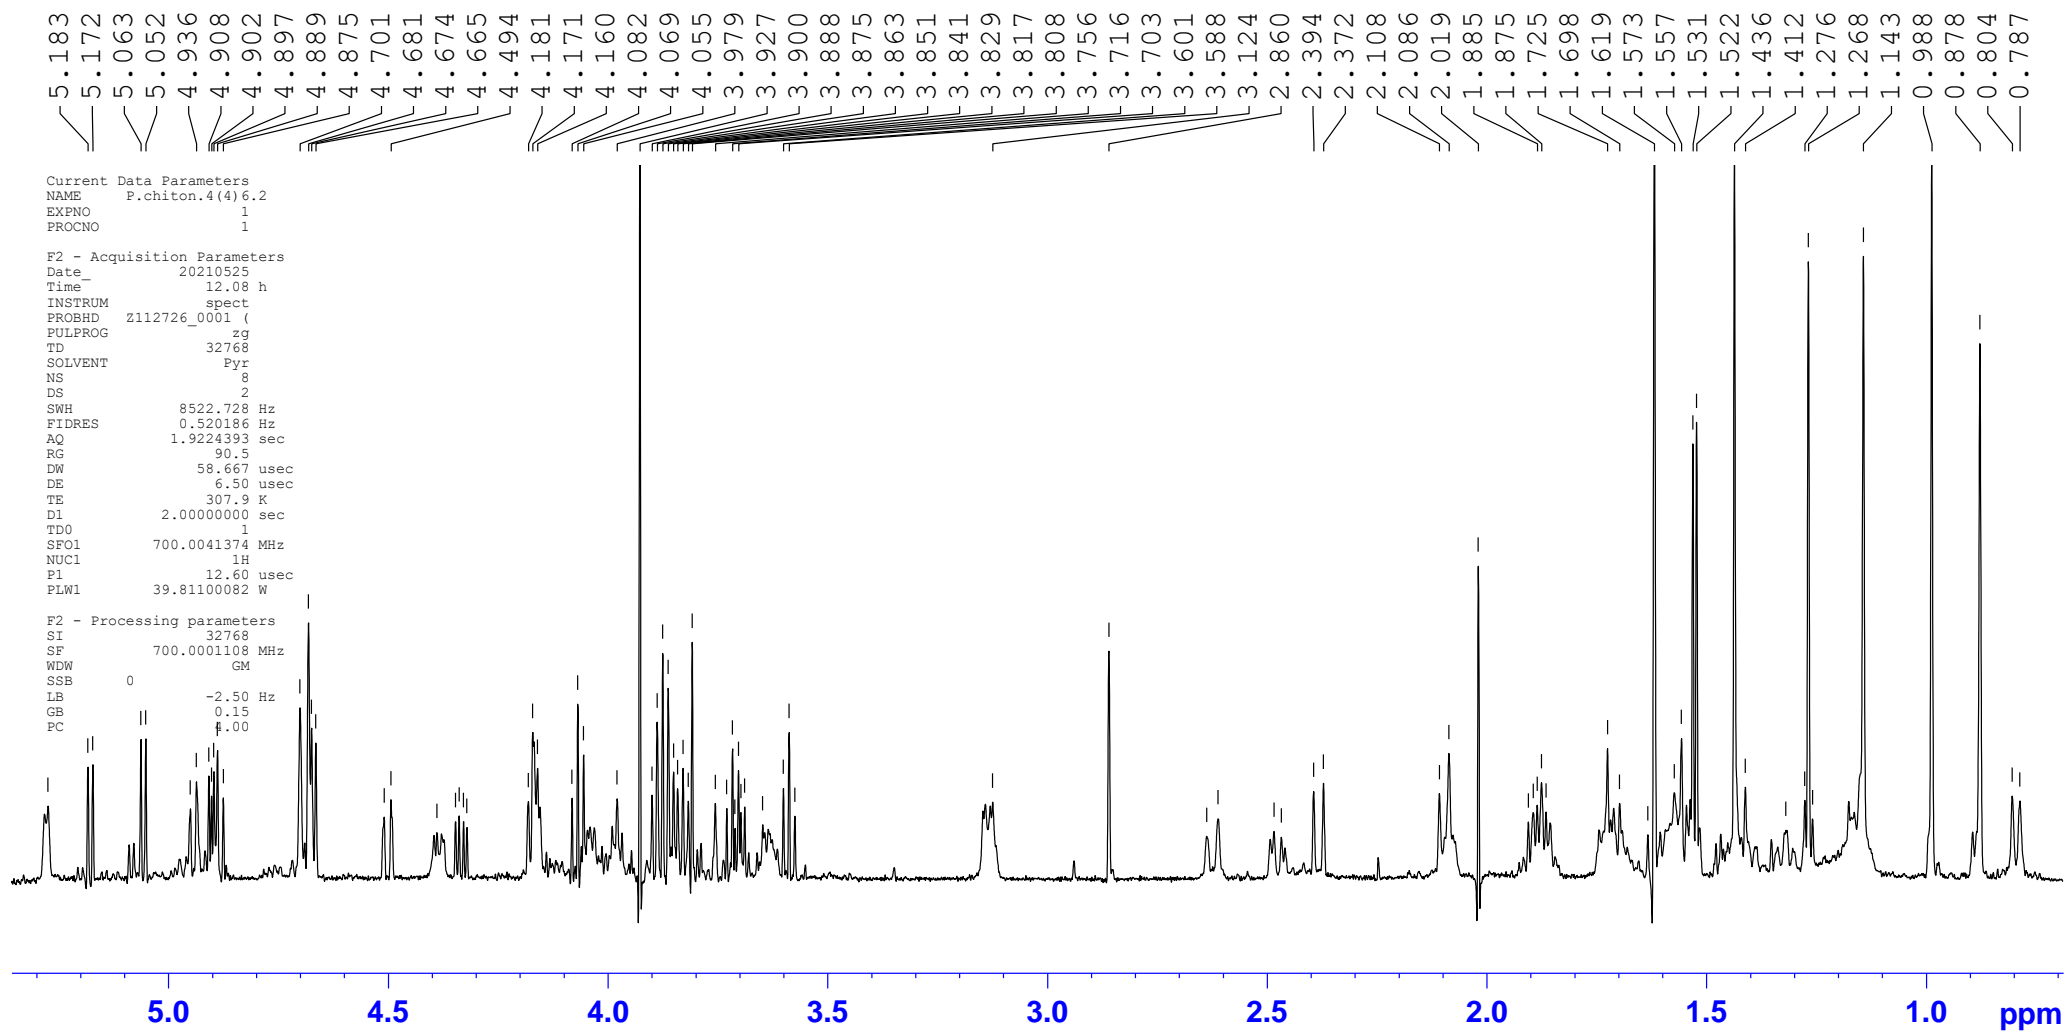

Figure S10. The  $^1\text{H}$  NMR (500.12 MHz) spectrum of chitonoidoside F (**2**) in  $\text{C}_5\text{D}_5\text{N}/\text{D}_2\text{O}$  (4/1).

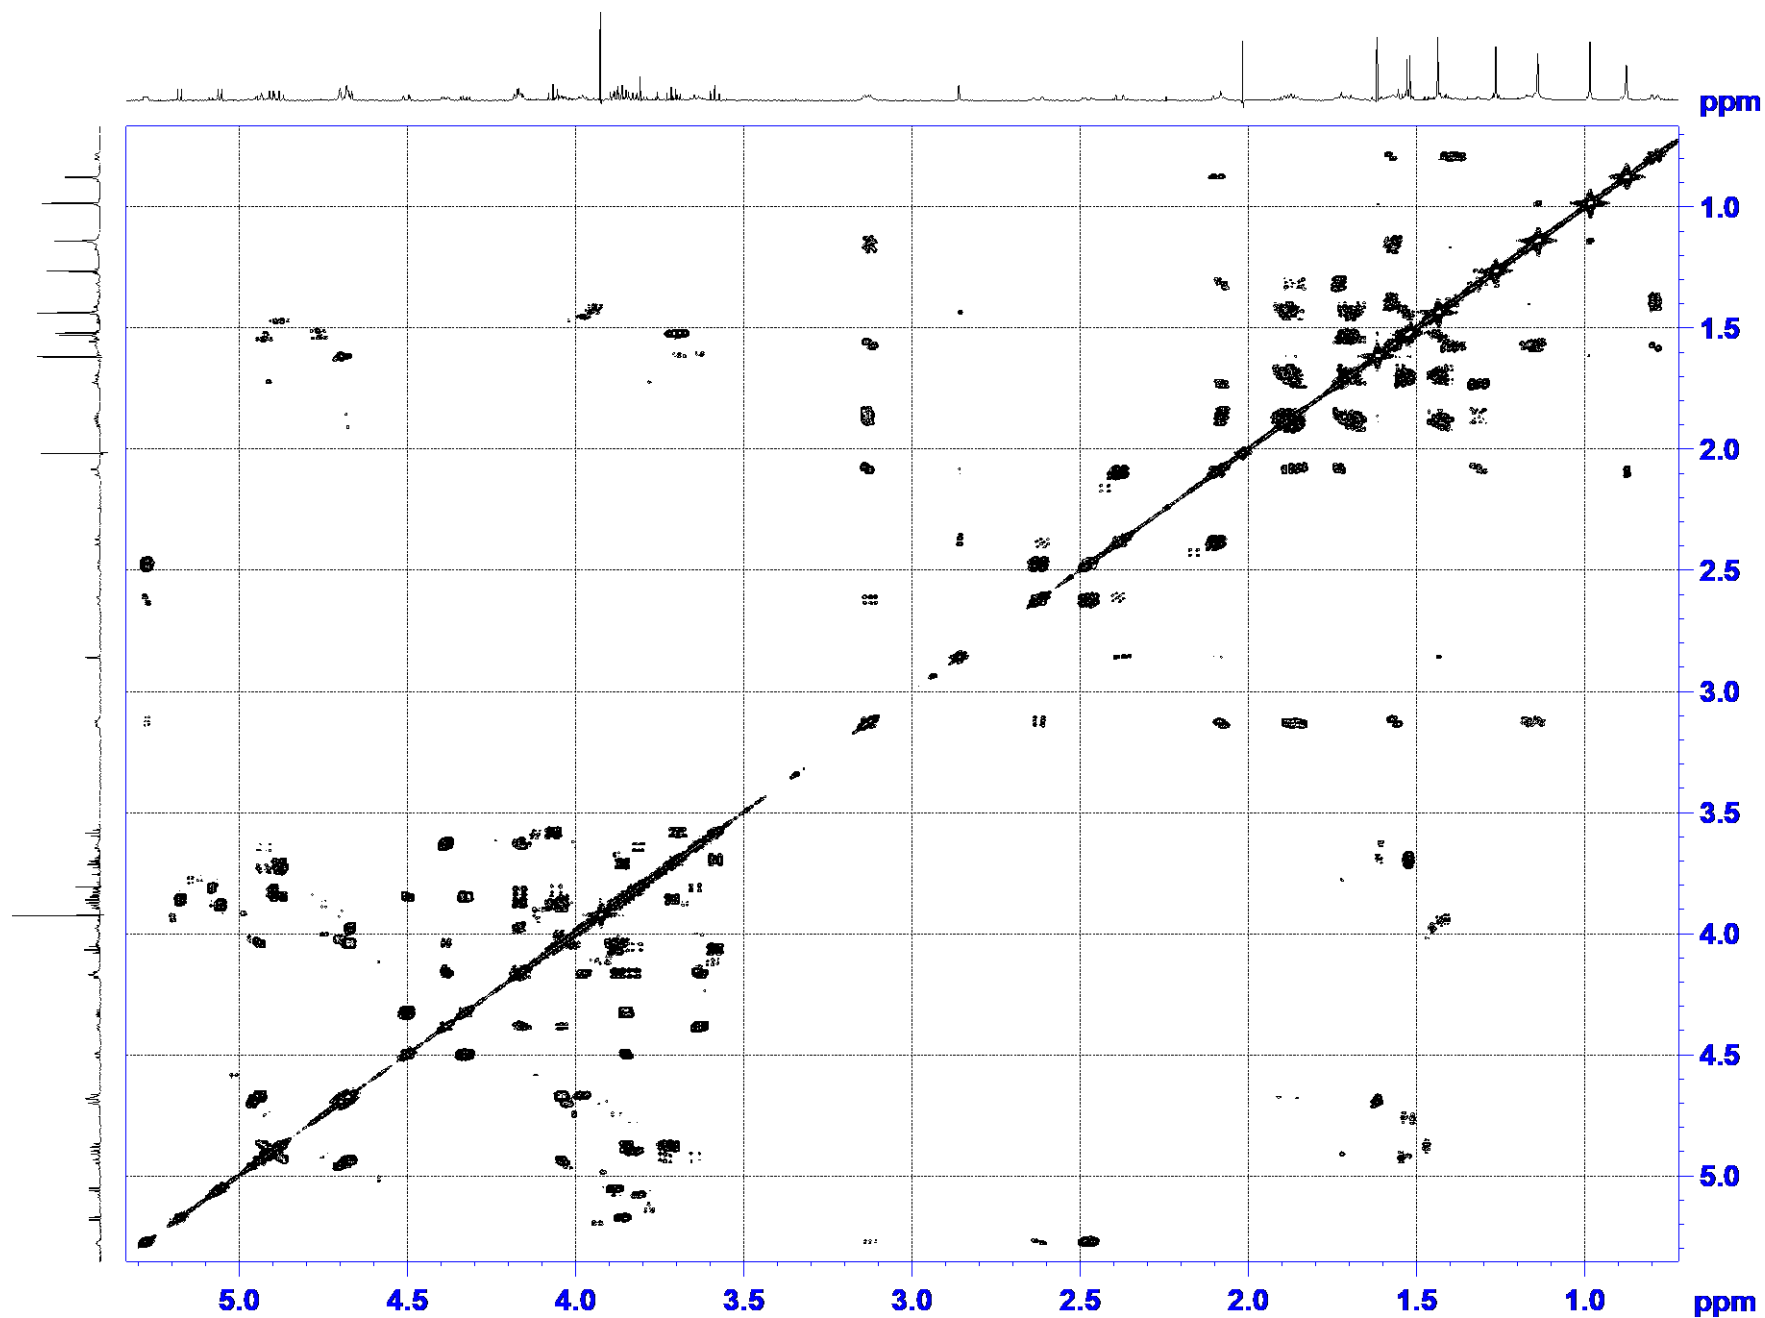

**Figure S11.** The COSY (500.12 MHz) spectrum of chitonoidoside F (**2**) in C<sub>5</sub>D<sub>5</sub>N/D<sub>2</sub>O (4/1).

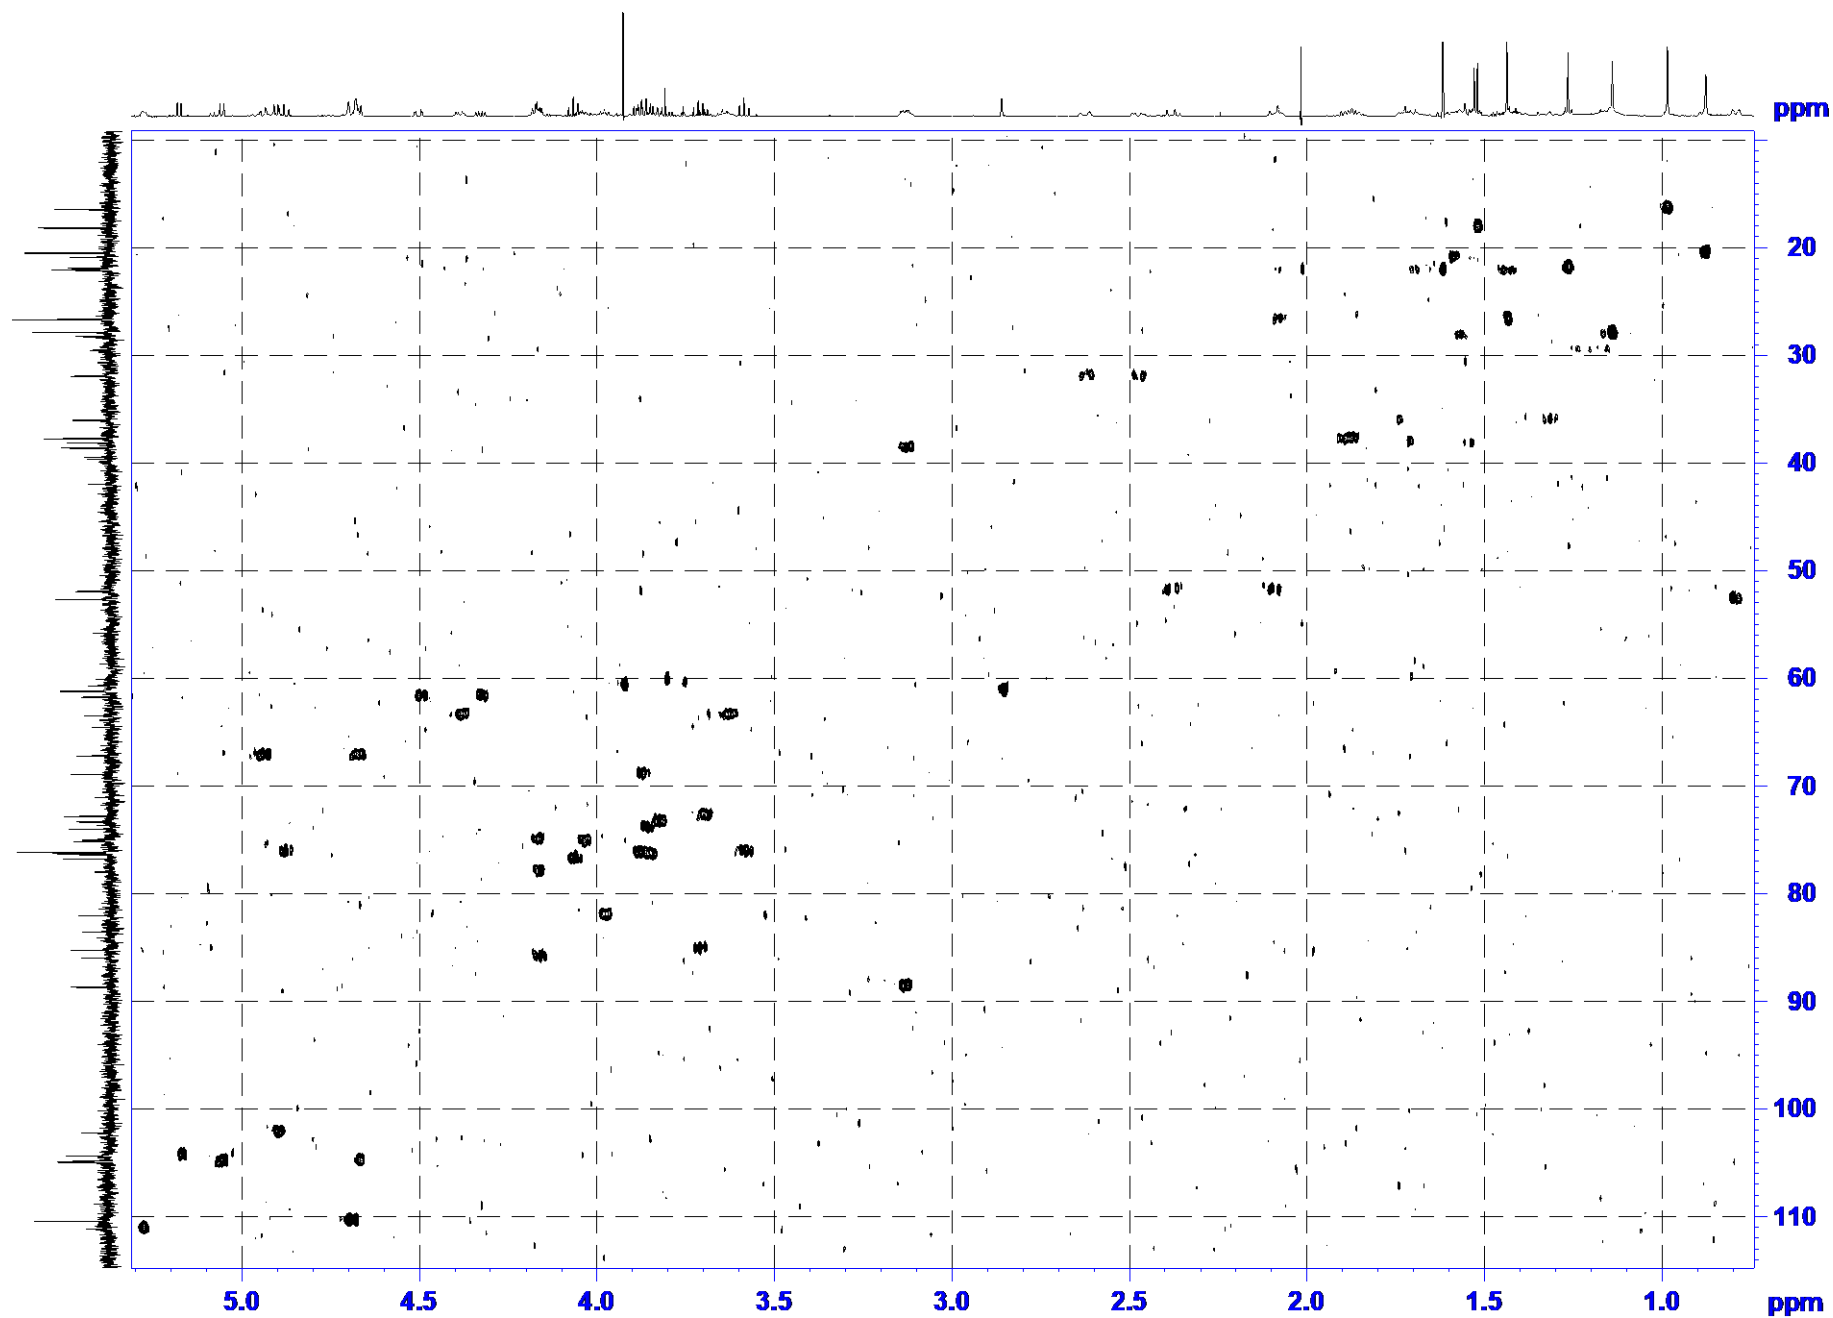

Figure S12. The HSQC (500.12 MHz) spectrum of chitonoidoside F (2) in C<sub>5</sub>D<sub>5</sub>N/D<sub>2</sub>O (4/1).

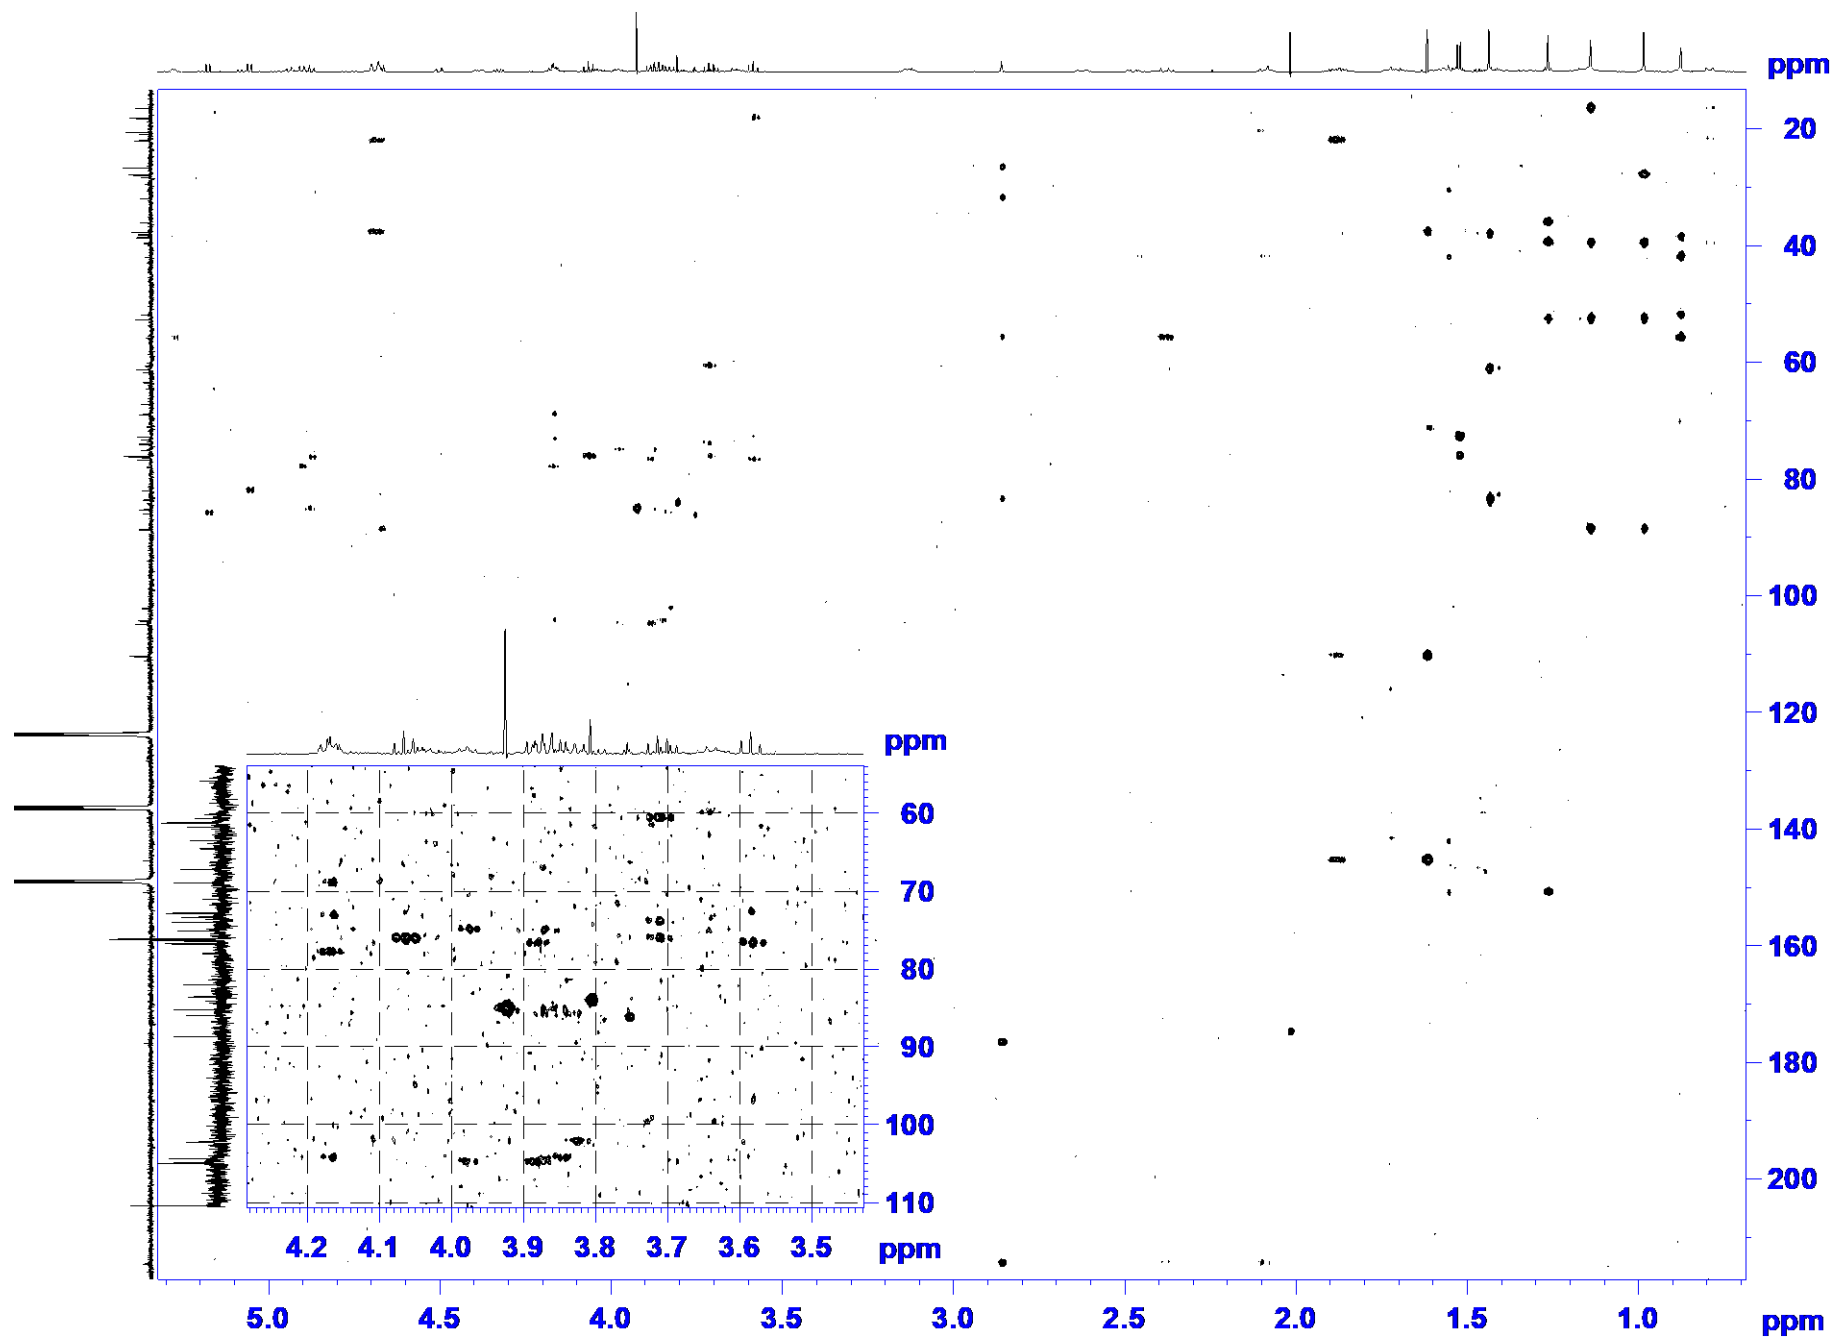

Figure S13. The HMBC (500.12 MHz) spectrum of chitonoidoside F (2) in C<sub>5</sub>D<sub>5</sub>N/D<sub>2</sub>O (4/1).



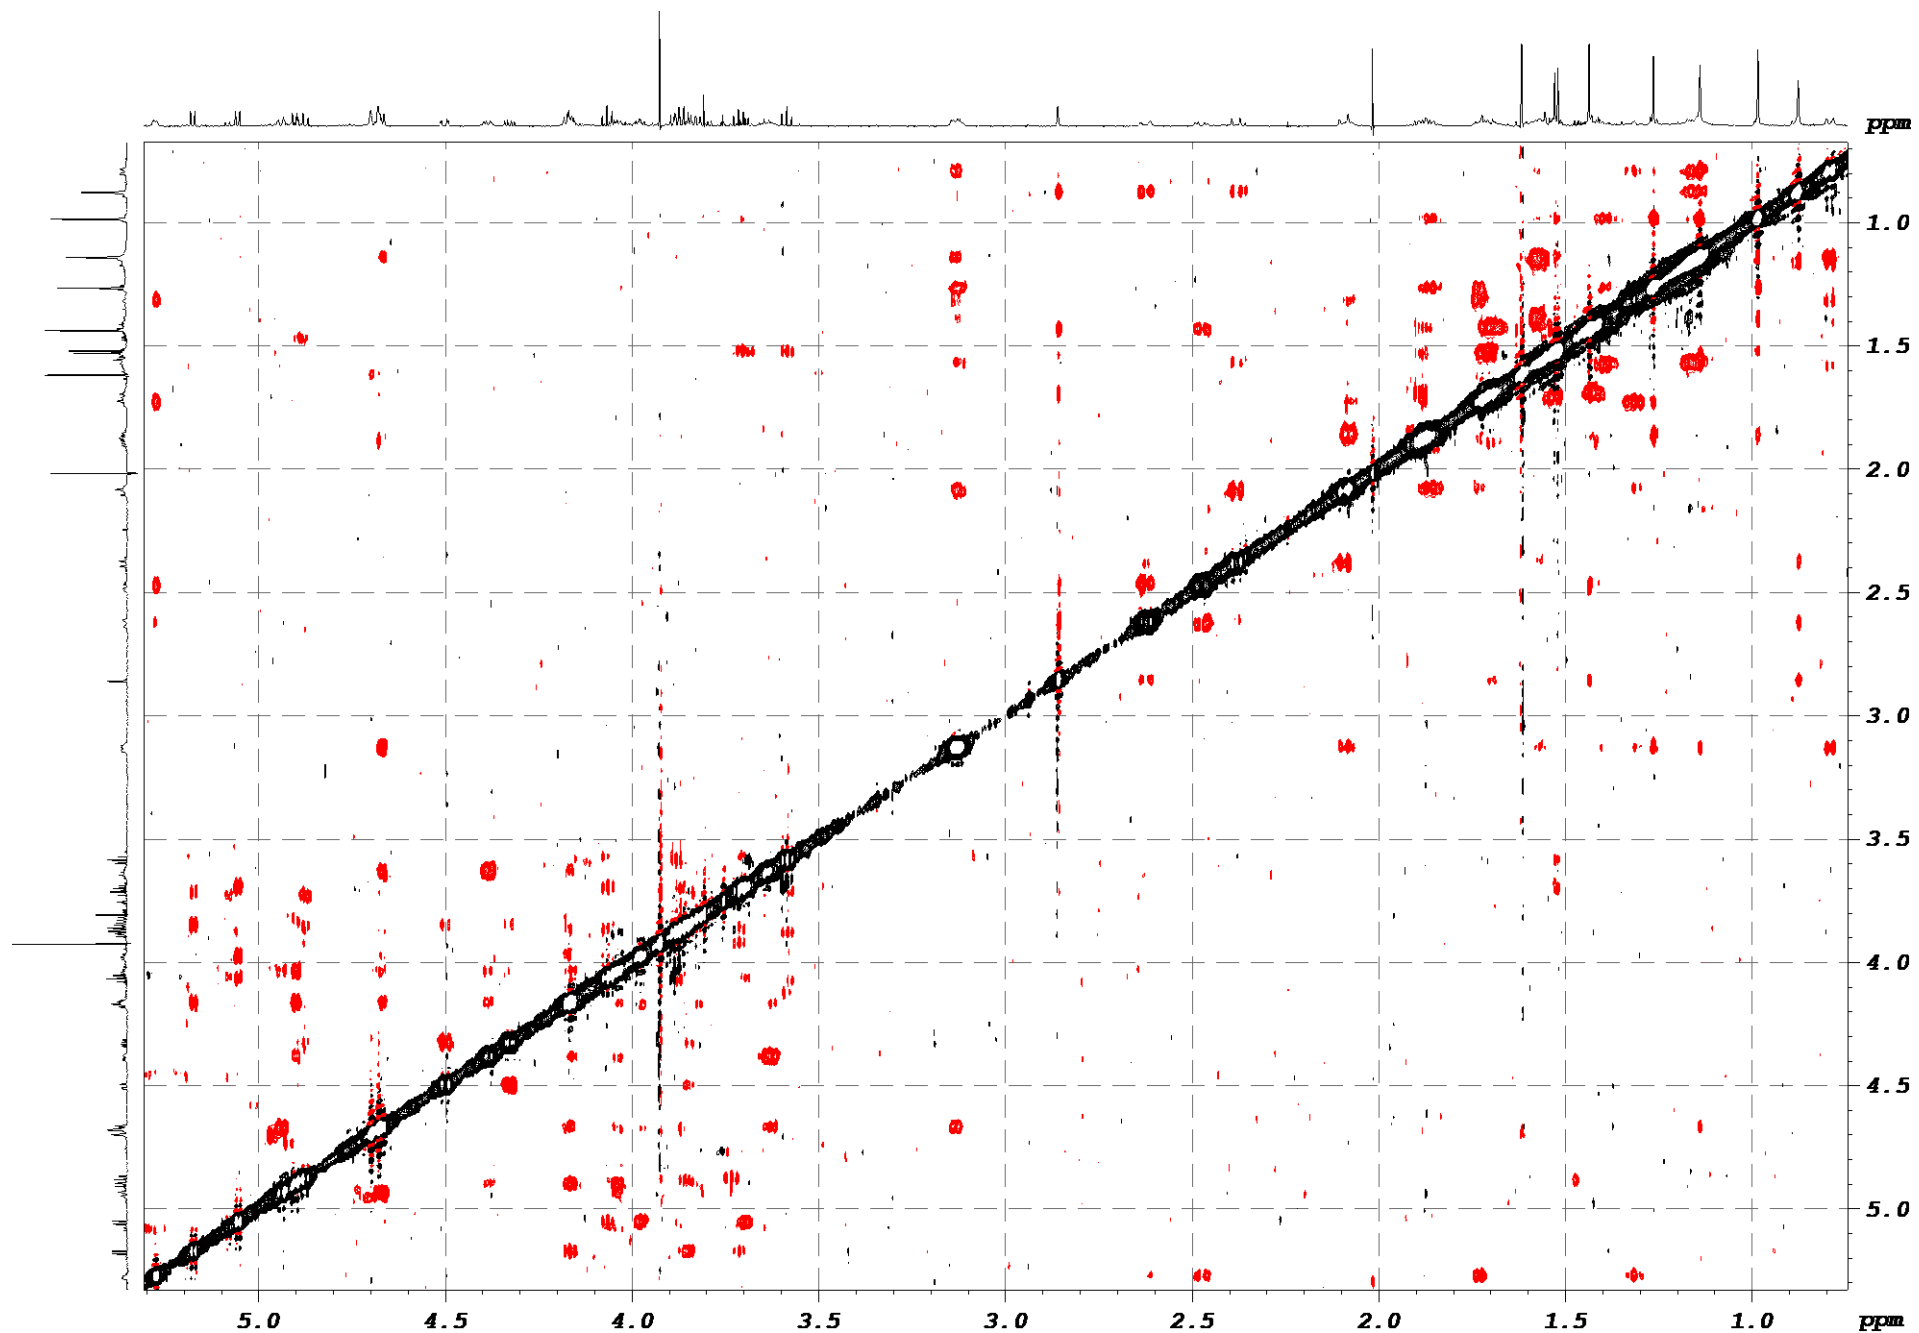

**Figure S14.** The ROESY (500.12 MHz) spectrum of chitonoidoside F (**2**) in C<sub>5</sub>D<sub>5</sub>N/D<sub>2</sub>O (4/1).

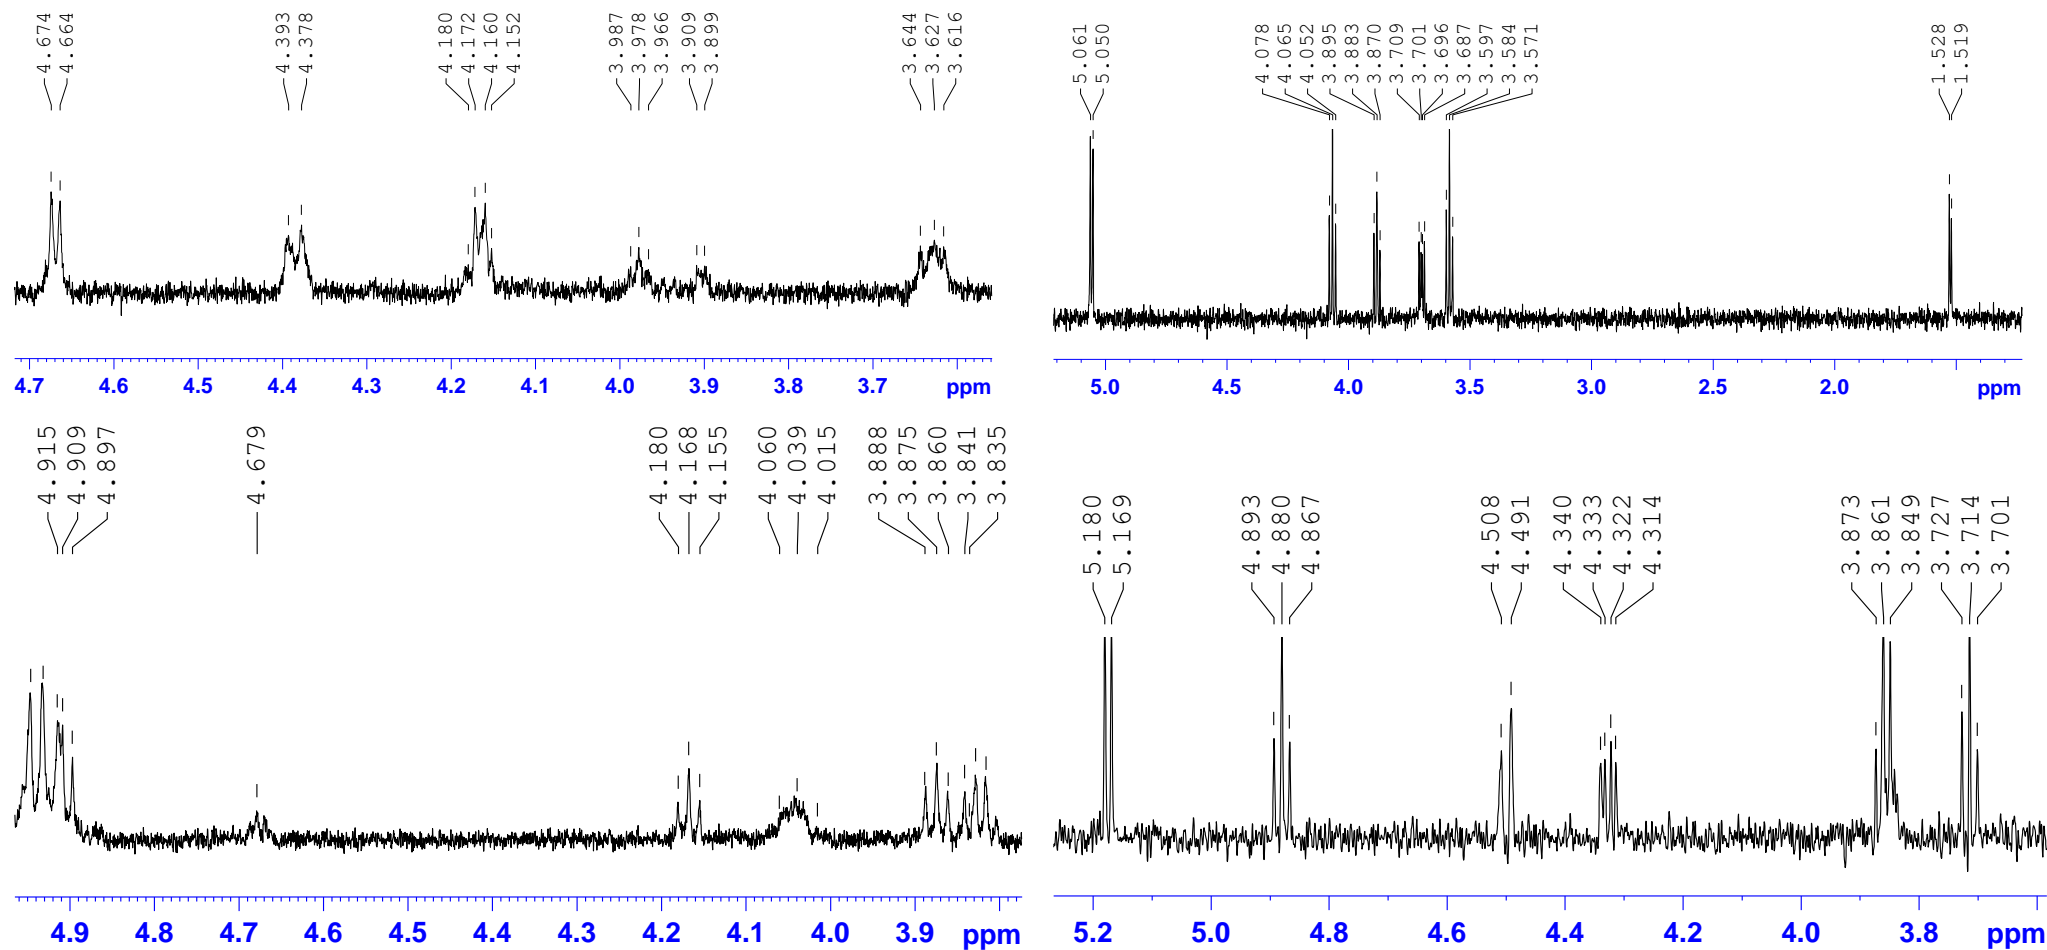

**Figure S15.** 1D TOCSY (500.12 MHz) spectra of Xyl1, Qui2, Glc3 and MeGlc4 of chitonoidoside F (2) in C<sub>5</sub>D<sub>5</sub>N/D<sub>2</sub>O (4/1).

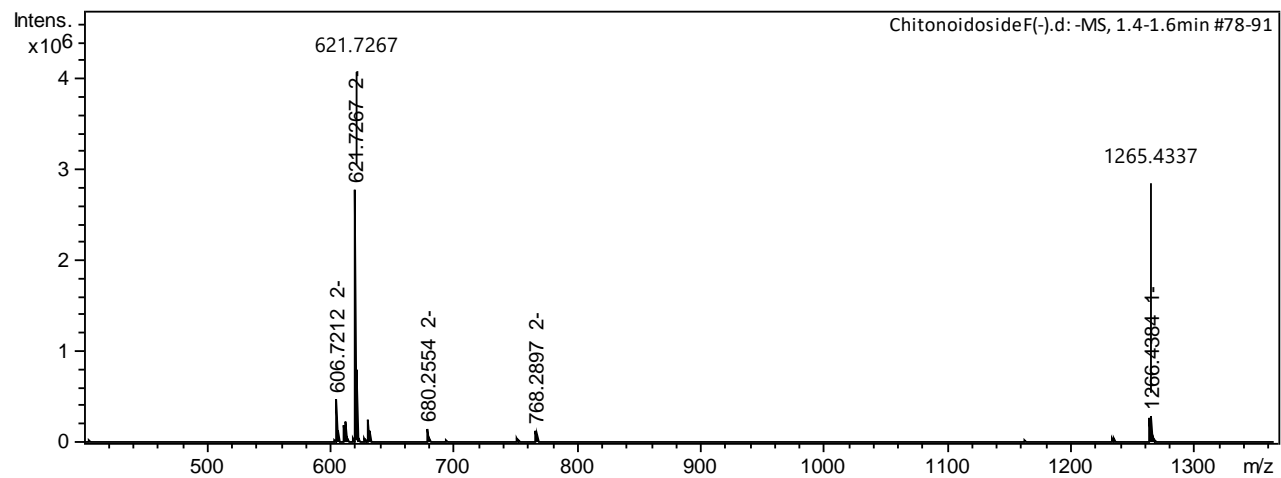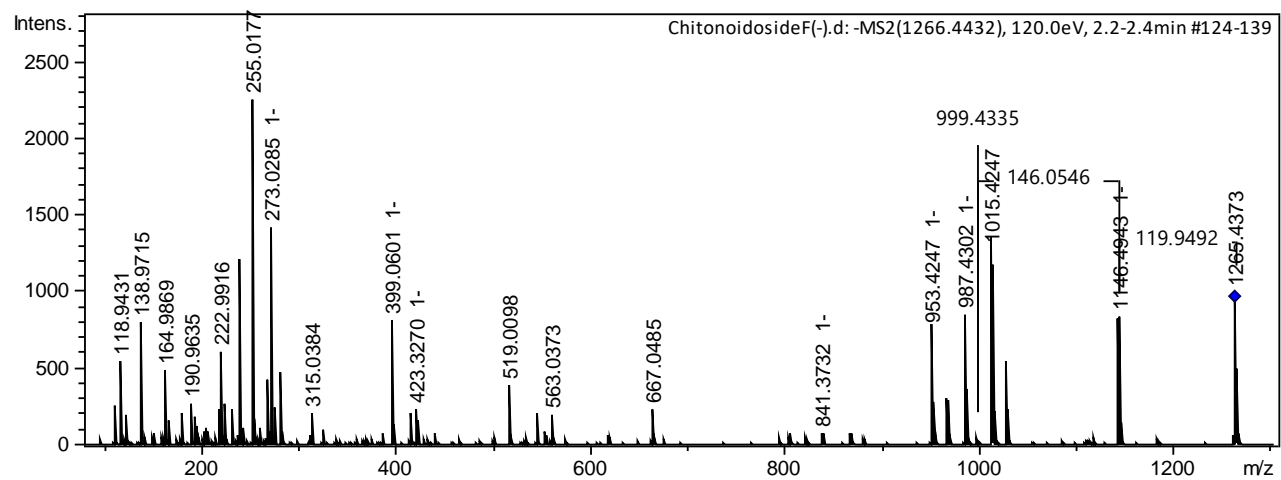

**Figure S16.** HR-ESI-MS and ESI-MS/MS spectra of chitonoidoside F (2).

**Table S2.** <sup>13</sup>C and <sup>1</sup>H NMR chemical shifts, HMBC and ROESY correlations of the aglycone moiety of chitonoidoside F (2).

| Position | $\delta_C$ mult. <sup>a</sup> | $\delta_H$ mult. (J in Hz) <sup>b</sup> | HMBC                      | ROESY                   |
|----------|-------------------------------|-----------------------------------------|---------------------------|-------------------------|
| 1        | 36.0 CH <sub>2</sub>          | 1.80 m                                  |                           | H-11, H-19              |
|          |                               | 1.32 m                                  |                           | H-3, H-5, H-11          |
| 2        | 26.7 CH <sub>2</sub>          | 2.07 m                                  |                           |                         |
|          |                               | 1.48 m                                  |                           | H-19, H-30              |
| 3        | 88.7 CH                       | 3.13 dd (4.2; 12.0)                     | C: 4, 30, 31, C:1 Xyl1    | H-1, H-5, H-31, H1-Xyl1 |
| 4        | 39.5 C                        |                                         |                           |                         |
| 5        | 52.7 CH                       | 0.80 brd (12.2)                         | C: 10, 19, 30             | H-1, H-3, H-31          |
| 6        | 20.9 CH <sub>2</sub>          | 1.58 m                                  |                           |                         |
| 7        | 28.3 CH <sub>2</sub>          | 1.56 m                                  |                           |                         |
|          |                               | 1.17 m                                  |                           | H-32                    |
| 8        | 38.6 CH                       | 3.13 m                                  |                           | H-6, H-19               |
| 9        | 150.9 C                       |                                         |                           |                         |
| 10       | 39.7 C                        |                                         |                           |                         |
| 11       | 111.1 CH                      | 5.28 m                                  | C: 10, 12, 13             | H-1                     |
| 12       | 31.9 CH <sub>2</sub>          | 2.63 brd (16.9)                         | C: 9, 11, 13, 18          | H-17, H-32              |
|          |                               | 2.48 dd (5.5; 16.9)                     | C: 9, 11, 13, 14, 18      |                         |
| 13       | 55.8 C                        |                                         |                           |                         |
| 14       | 42.0 C                        |                                         |                           |                         |
| 15       | 51.9 CH <sub>2</sub>          | 2.38 d (15.4)                           | C: 13, 16, 17, 32         | H-7, H-32               |
|          |                               | 2.09 d (15.4)                           | C: 8, 14, 16, 32          |                         |
| 16       | 214.5 C                       |                                         |                           |                         |
| 17       | 61.7 CH                       | 2.86 s                                  | C: 12, 13, 16, 18, 20, 21 | H-21, H-32              |
| 18       | 176.7 C                       |                                         |                           |                         |
| 19       | 21.9 CH <sub>3</sub>          | 1.27 s                                  | C: 1, 5, 9, 10            | H-8, H-30               |
| 20       | 83.6 C                        |                                         |                           |                         |
| 21       | 26.7 CH <sub>3</sub>          | 1.44 s                                  | C: 17, 20, 22             | H-12, H-17              |
| 22       | 38.1 CH <sub>2</sub>          | 1.71 m                                  | C: 20, 21, 23             |                         |
|          |                               | 1.55 m                                  |                           |                         |
| 23       | 22.0 CH <sub>2</sub>          | 1.70 m                                  |                           |                         |
|          |                               | 1.43 m                                  |                           |                         |
| 24       | 37.7 CH <sub>2</sub>          | 1.88 m                                  | C: 25, 26, 27             |                         |
| 25       | 145.5 C                       |                                         |                           |                         |
| 26       | 110.4 CH <sub>2</sub>         | 4.70 brs                                | C: 24, 27                 |                         |
|          |                               | 4.68 brs                                | C: 24, 27                 |                         |
| 27       | 22.1 CH <sub>3</sub>          | 1.62 s                                  | C: 24, 25, 26             |                         |
| 30       | 16.4 CH <sub>3</sub>          | 0.99 s                                  | C: 3, 4, 5, 31            | H-31                    |
| 31       | 27.9 CH <sub>3</sub>          | 1.14 s                                  | C: 3, 4, 5, 30            | H-3, H-5, H-30          |
| 32       | 20.4 CH <sub>3</sub>          | 0.88 s                                  | C: 8, 13, 14, 15          | H-7, H-12, H-17         |

<sup>a</sup>Recorded at 125.67 MHz in C<sub>5</sub>D<sub>5</sub>N/D<sub>2</sub>O (4/1). <sup>b</sup>Recorded at 500.12 MHz in C<sub>5</sub>D<sub>5</sub>N/D<sub>2</sub>O (4/1).

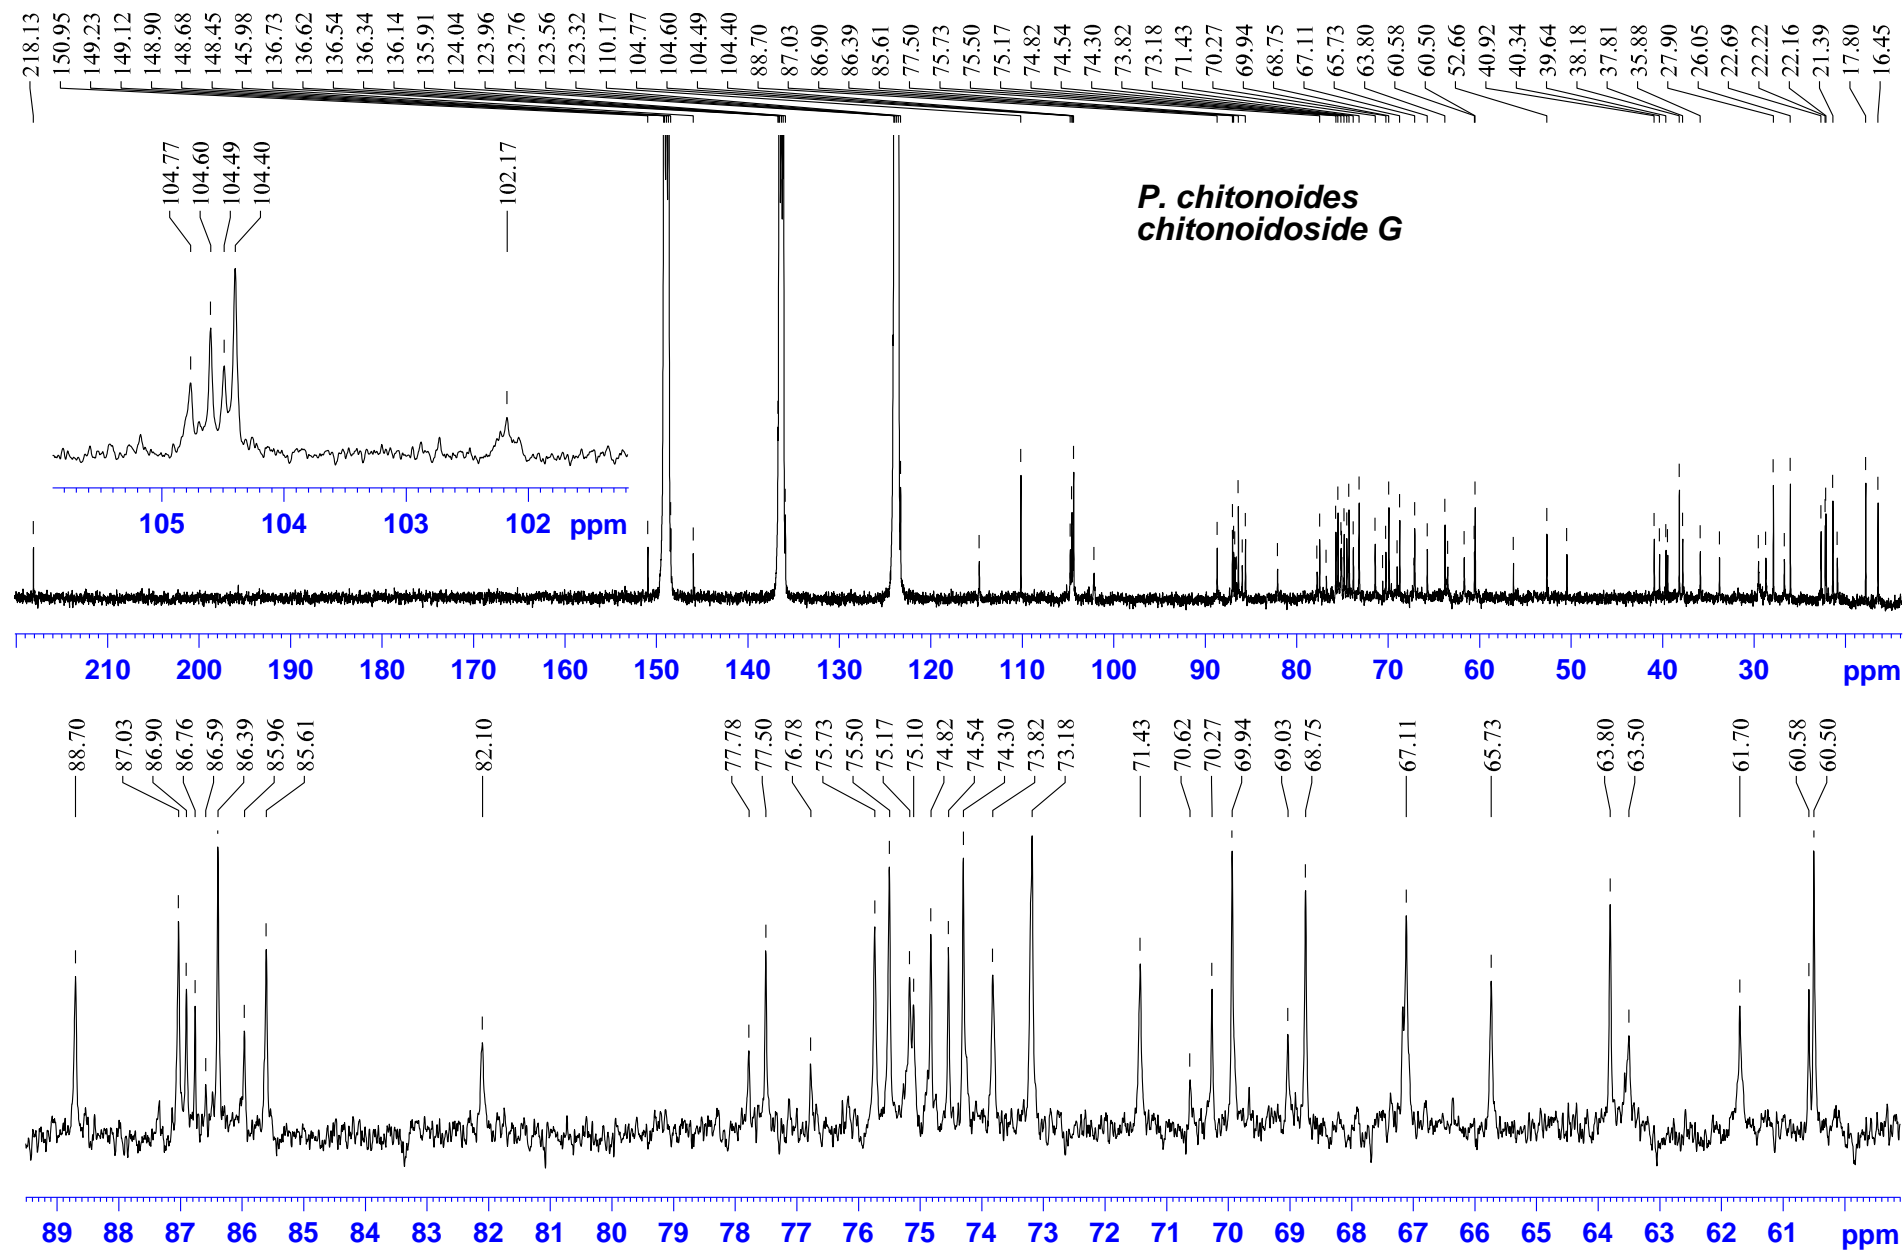

**Figure S17.** The  $^{13}\text{C}$  NMR (125.67 MHz) spectrum of chitonoidoside G (**3**) in  $\text{C}_5\text{D}_5\text{N}/\text{D}_2\text{O}$  (4/1).

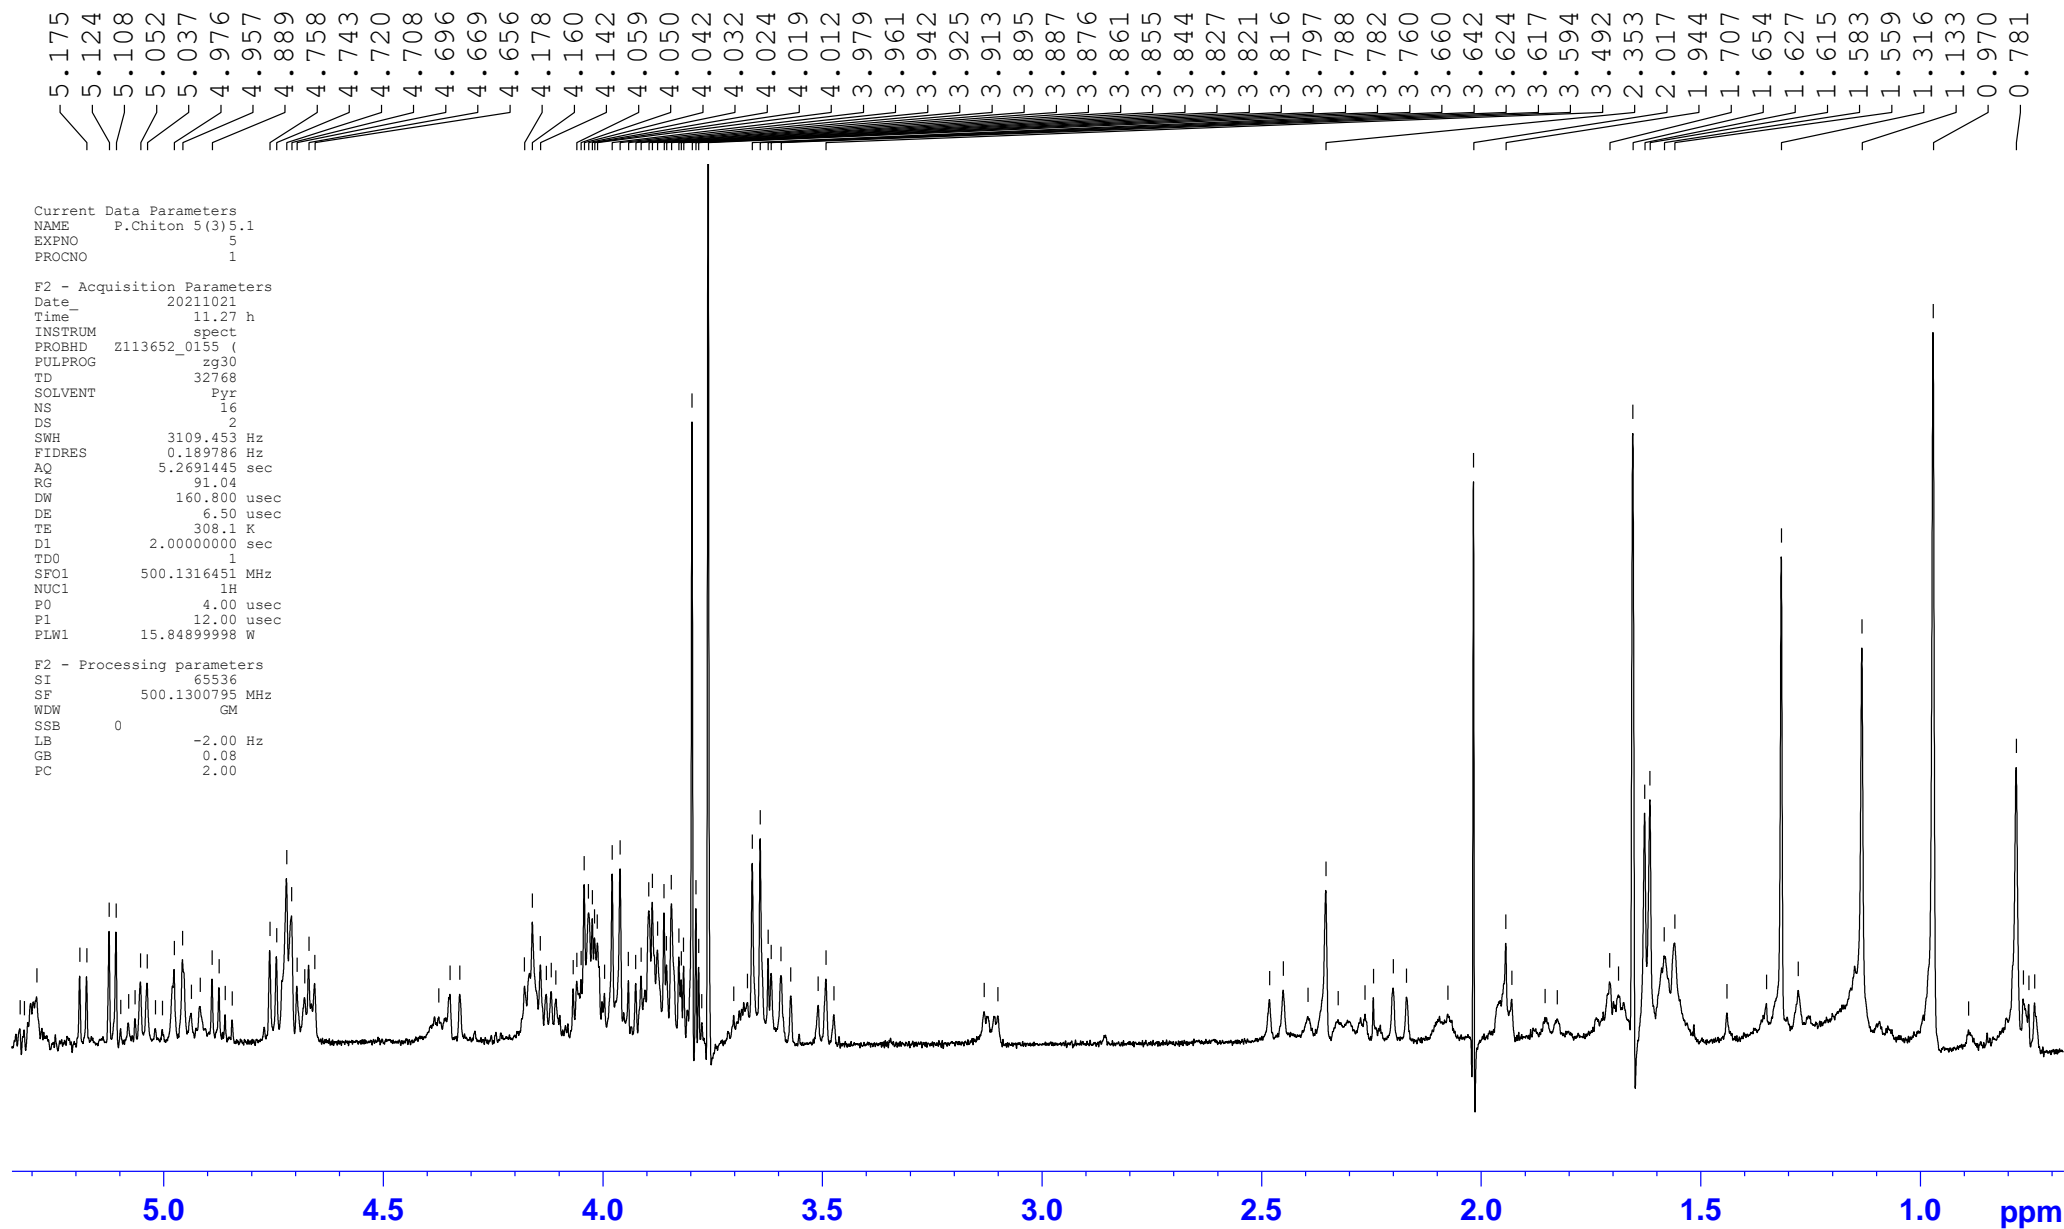

Figure S18. The  $^1\text{H}$  NMR (500.12 MHz) spectrum of chitonoidoside G (3) in  $\text{C}_5\text{D}_5\text{N}/\text{D}_2\text{O}$  (4/1)

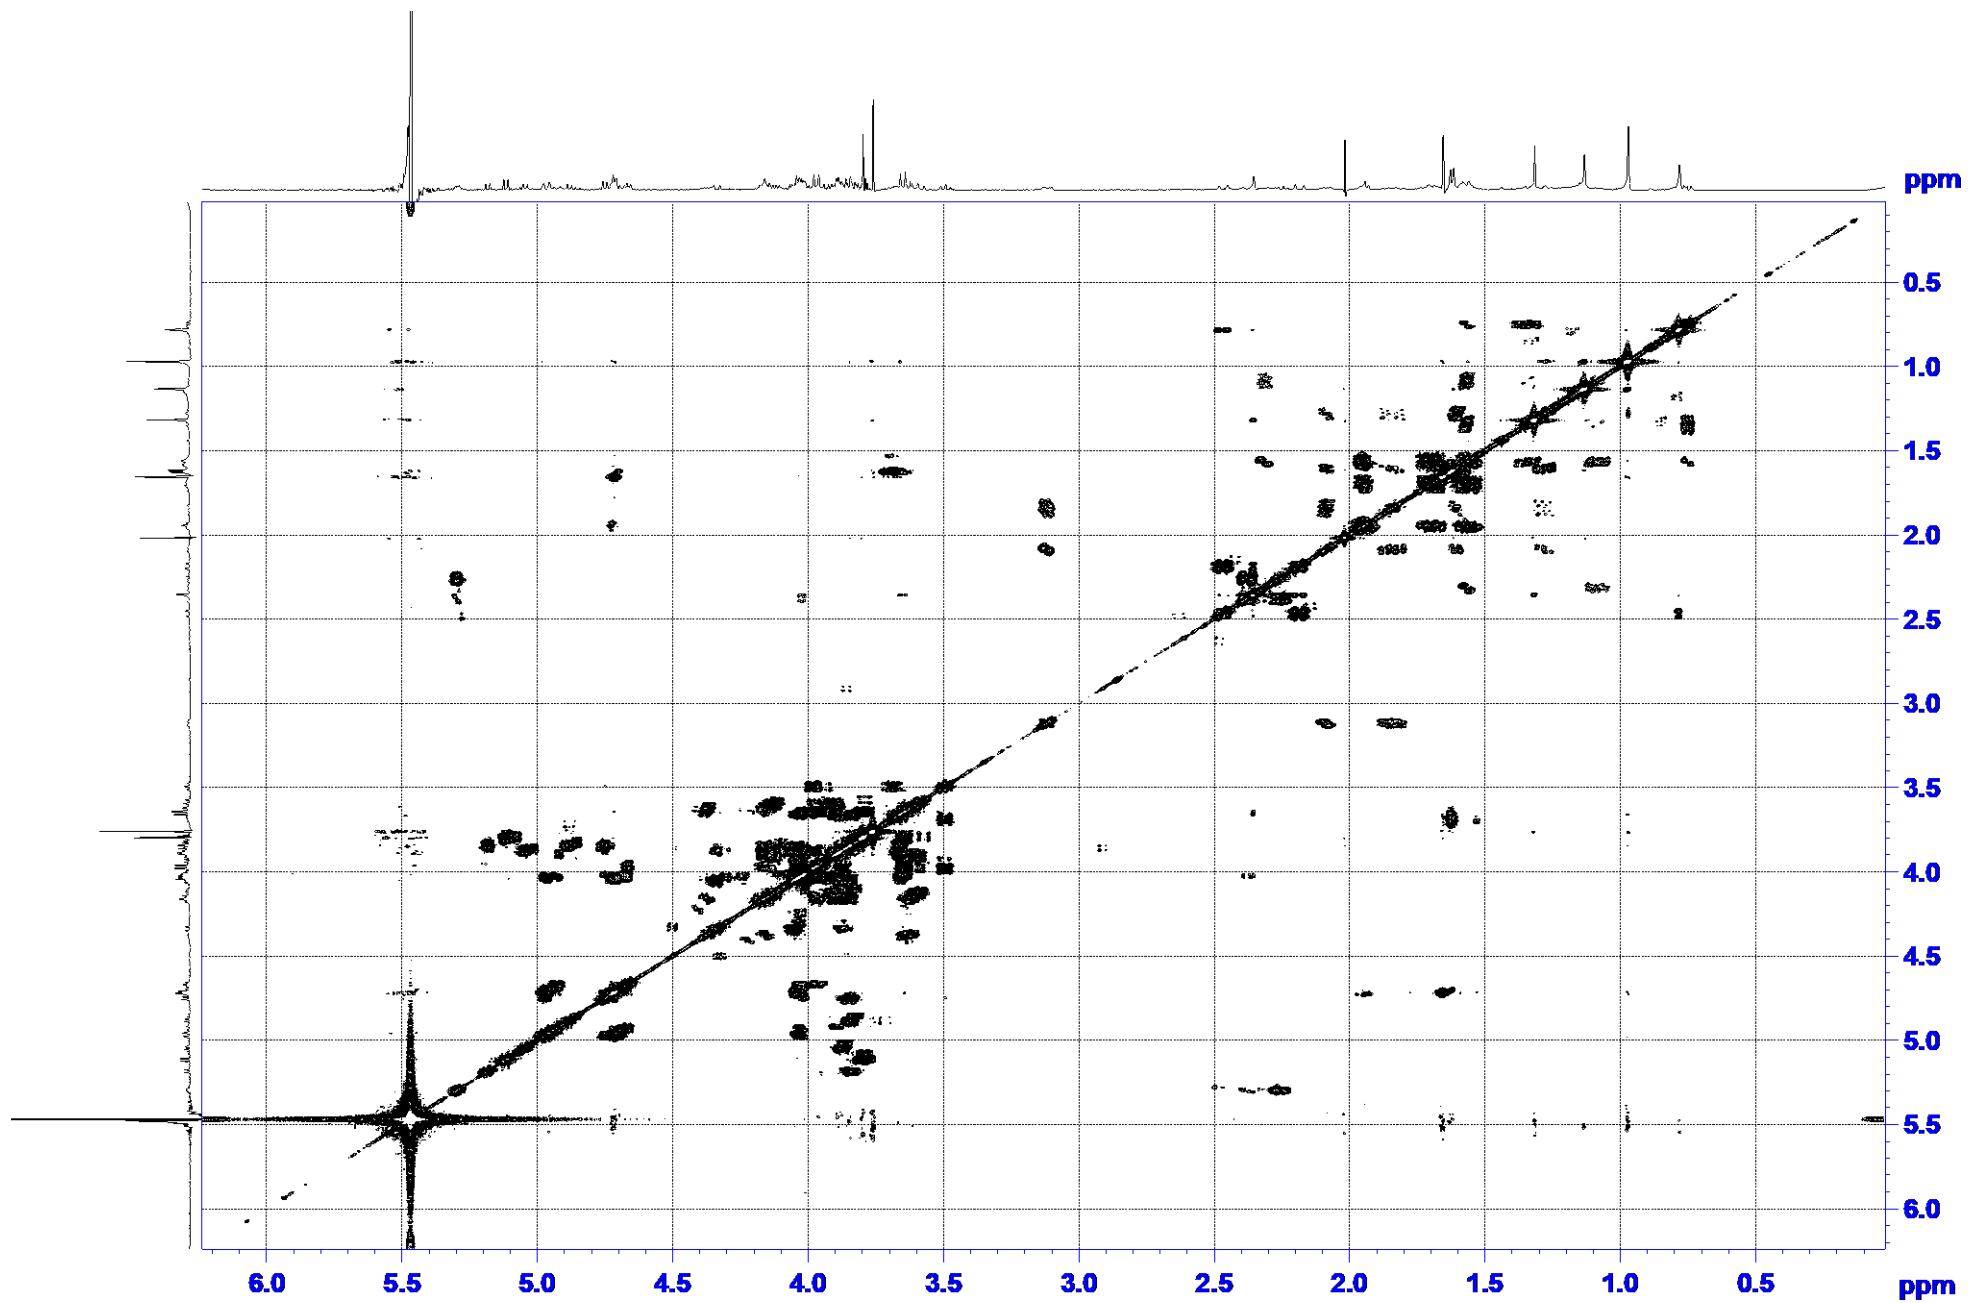

Figure S19. The COSY (500.12 MHz) spectrum of chitonoidoside G (**3**) in C<sub>5</sub>D<sub>5</sub>N/D<sub>2</sub>O (4/1)

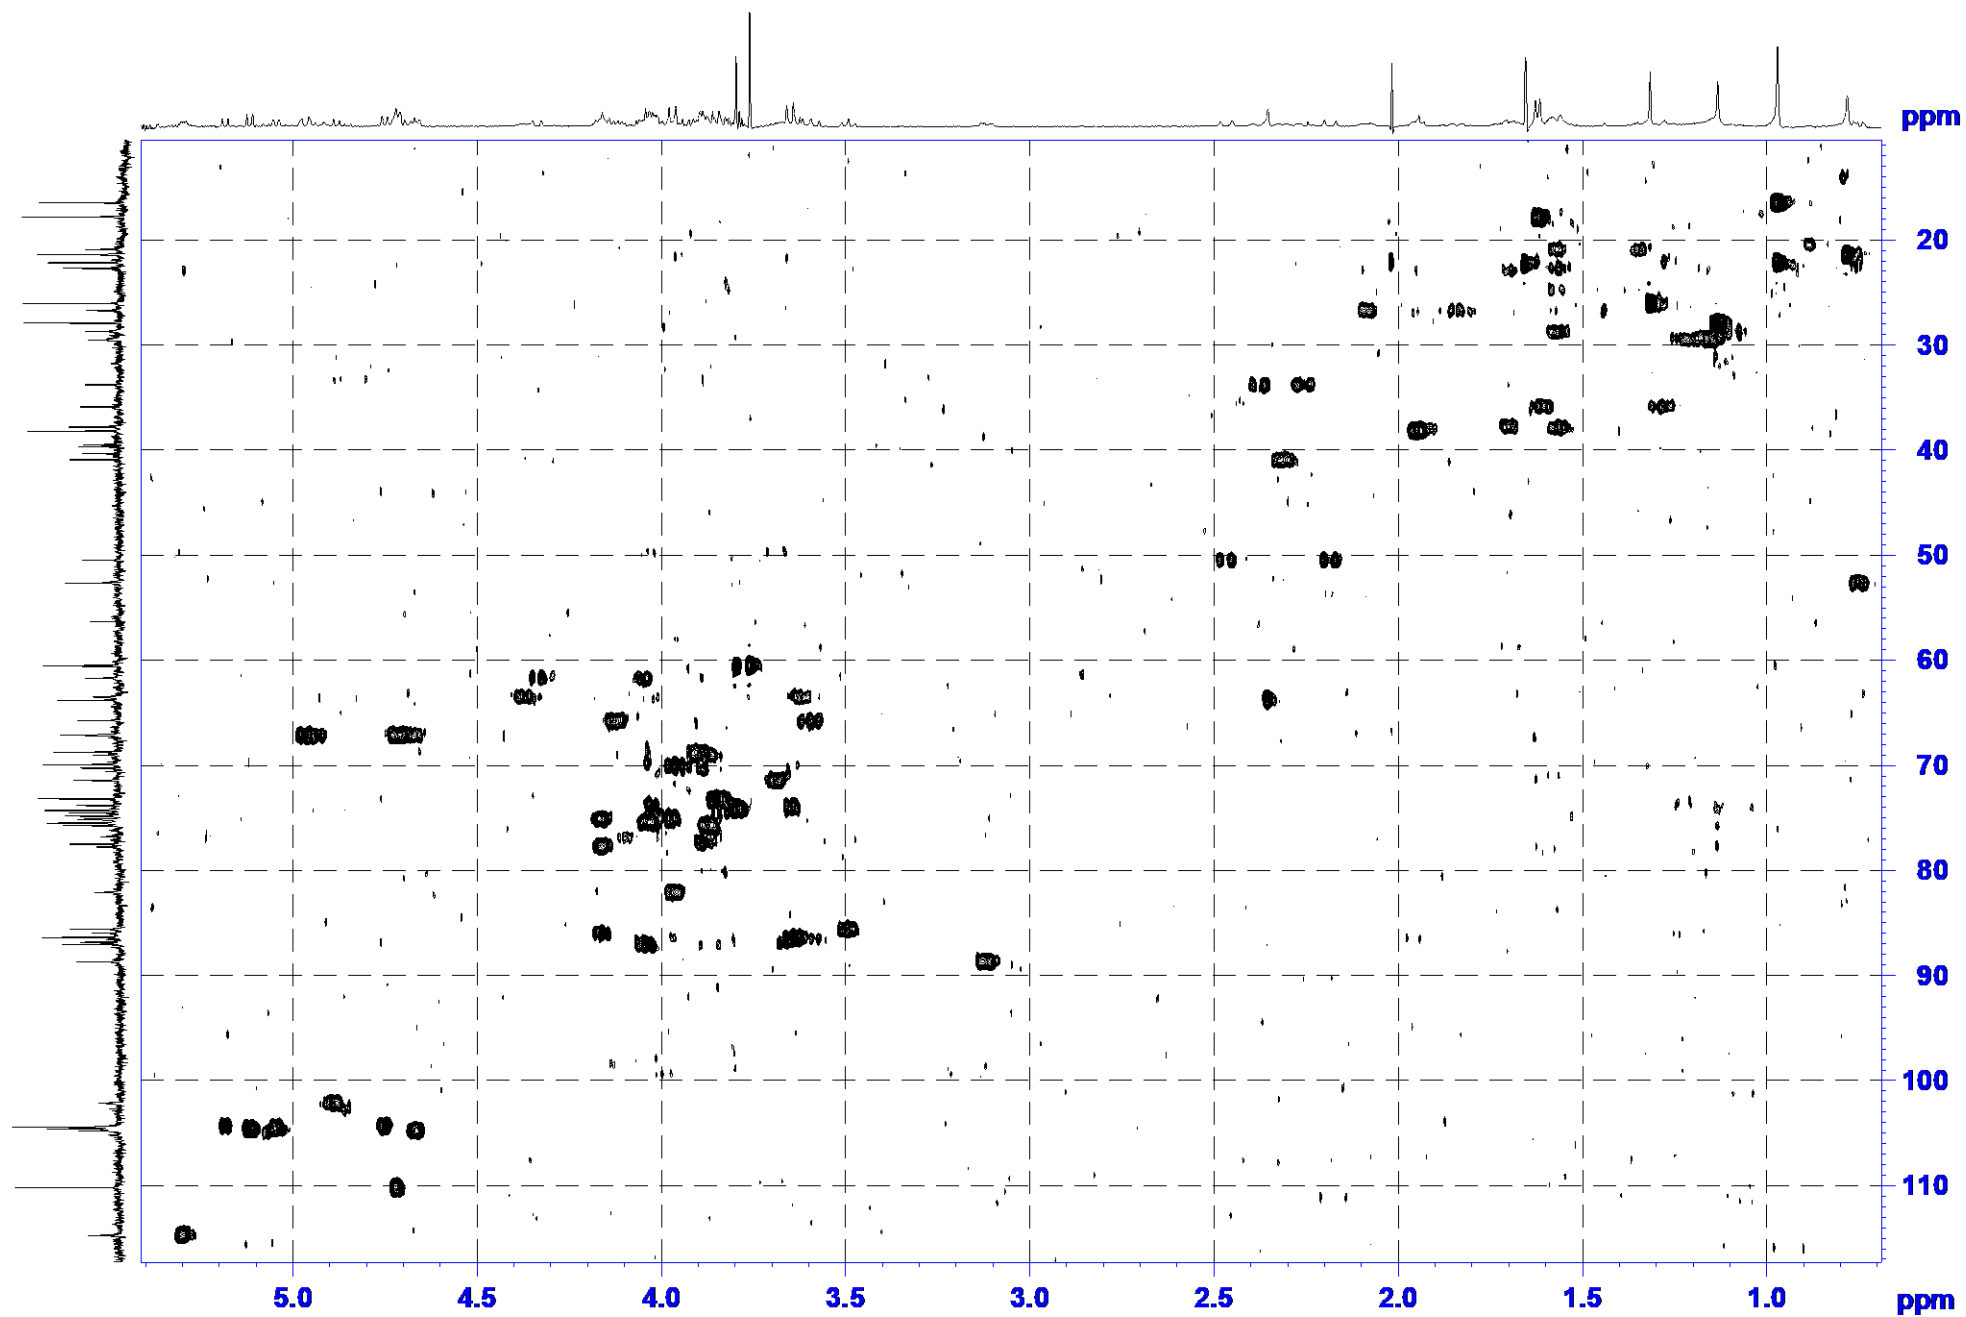

Figure S20. The HSQC (500.12 MHz) spectrum of chitonoidoside G (3) in C<sub>5</sub>D<sub>5</sub>N/D<sub>2</sub>O (4/1)



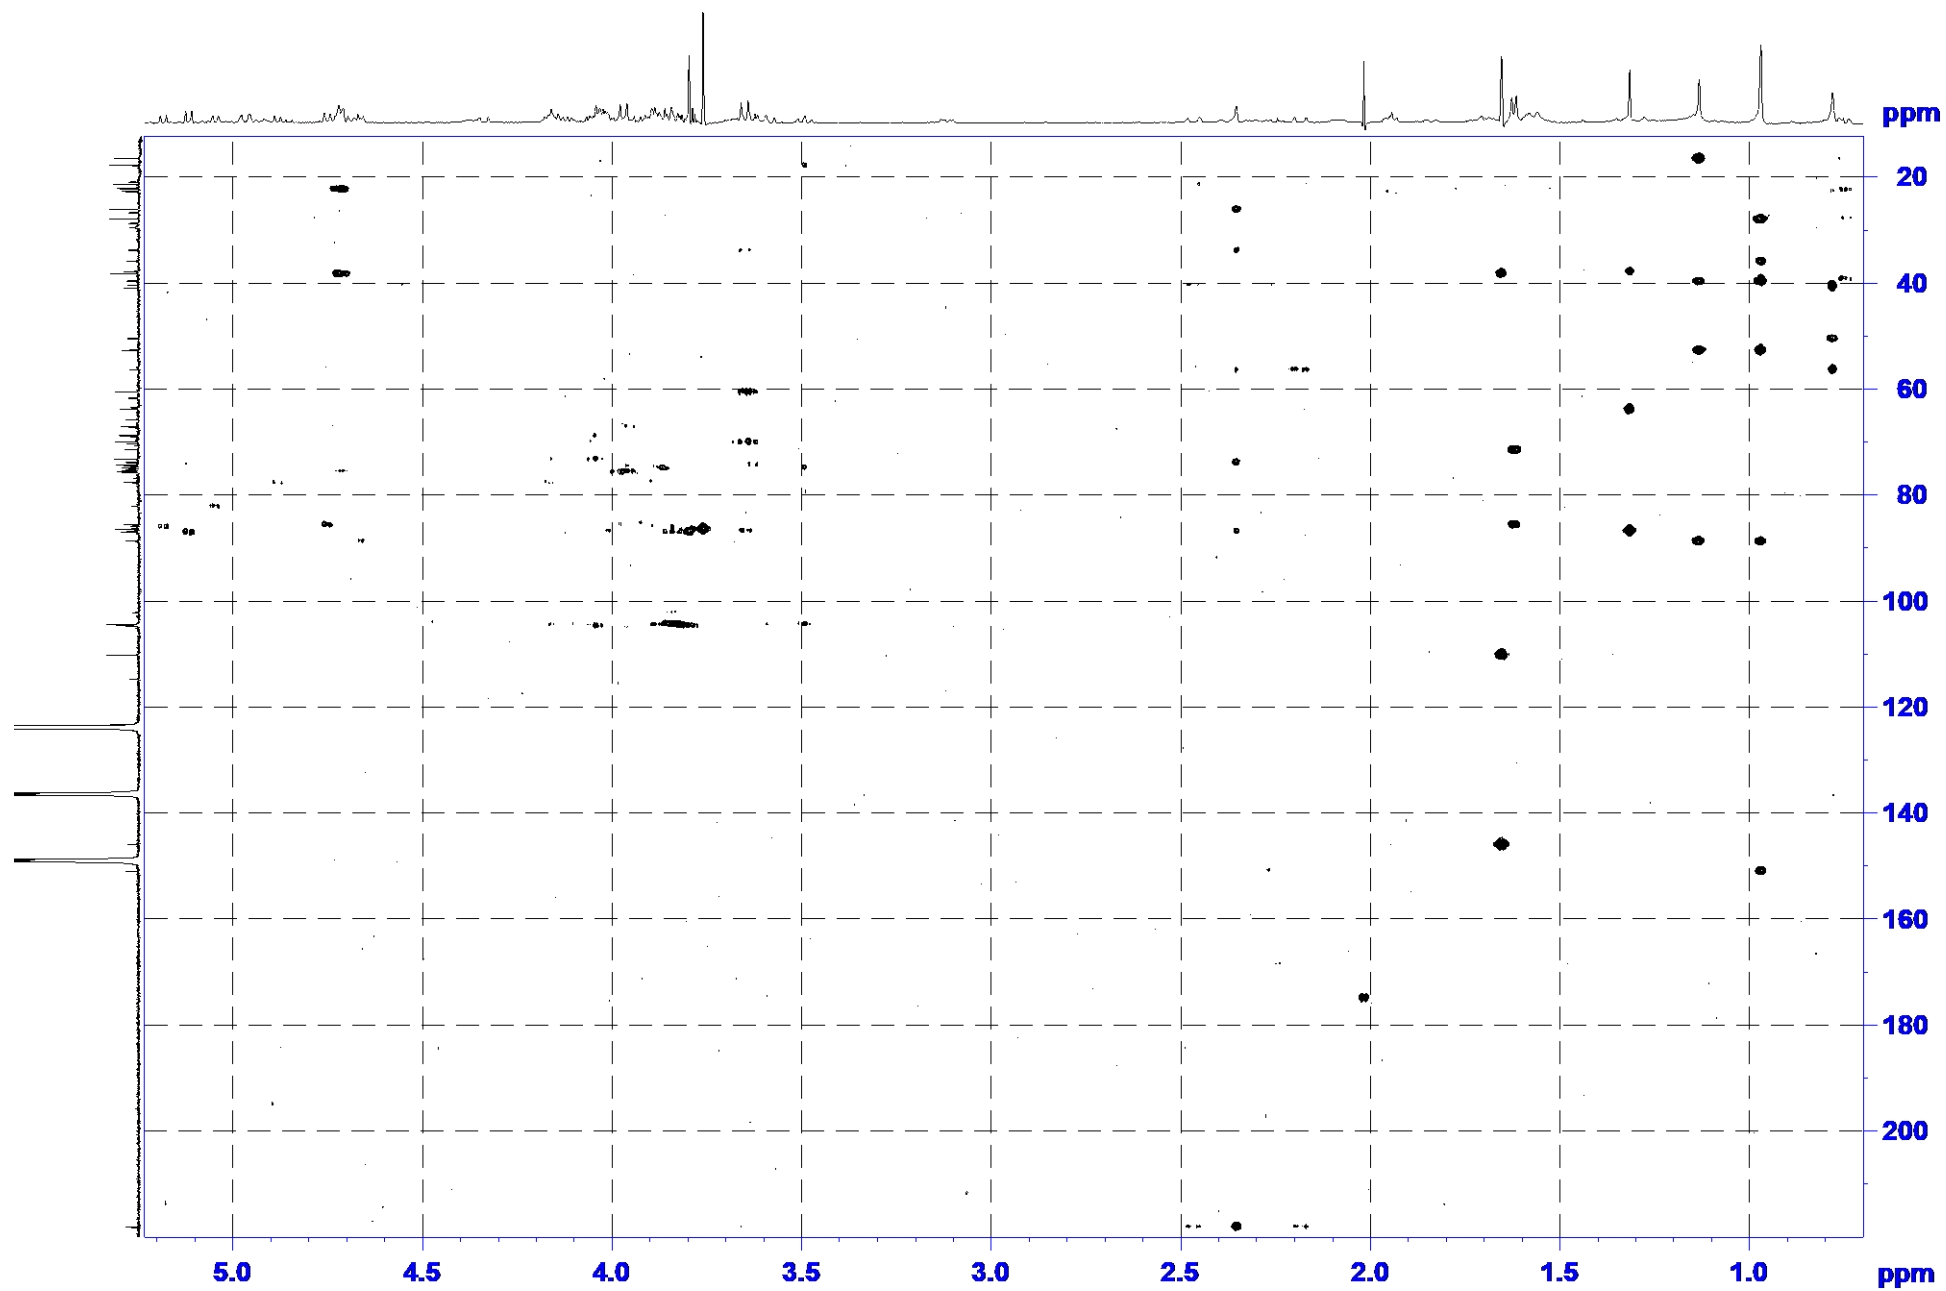

Figure S21. The HMBC (500.12 MHz) spectrum of chitonoidoside G (3) in  $\text{C}_5\text{D}_5\text{N}/\text{D}_2\text{O}$  (4/1)

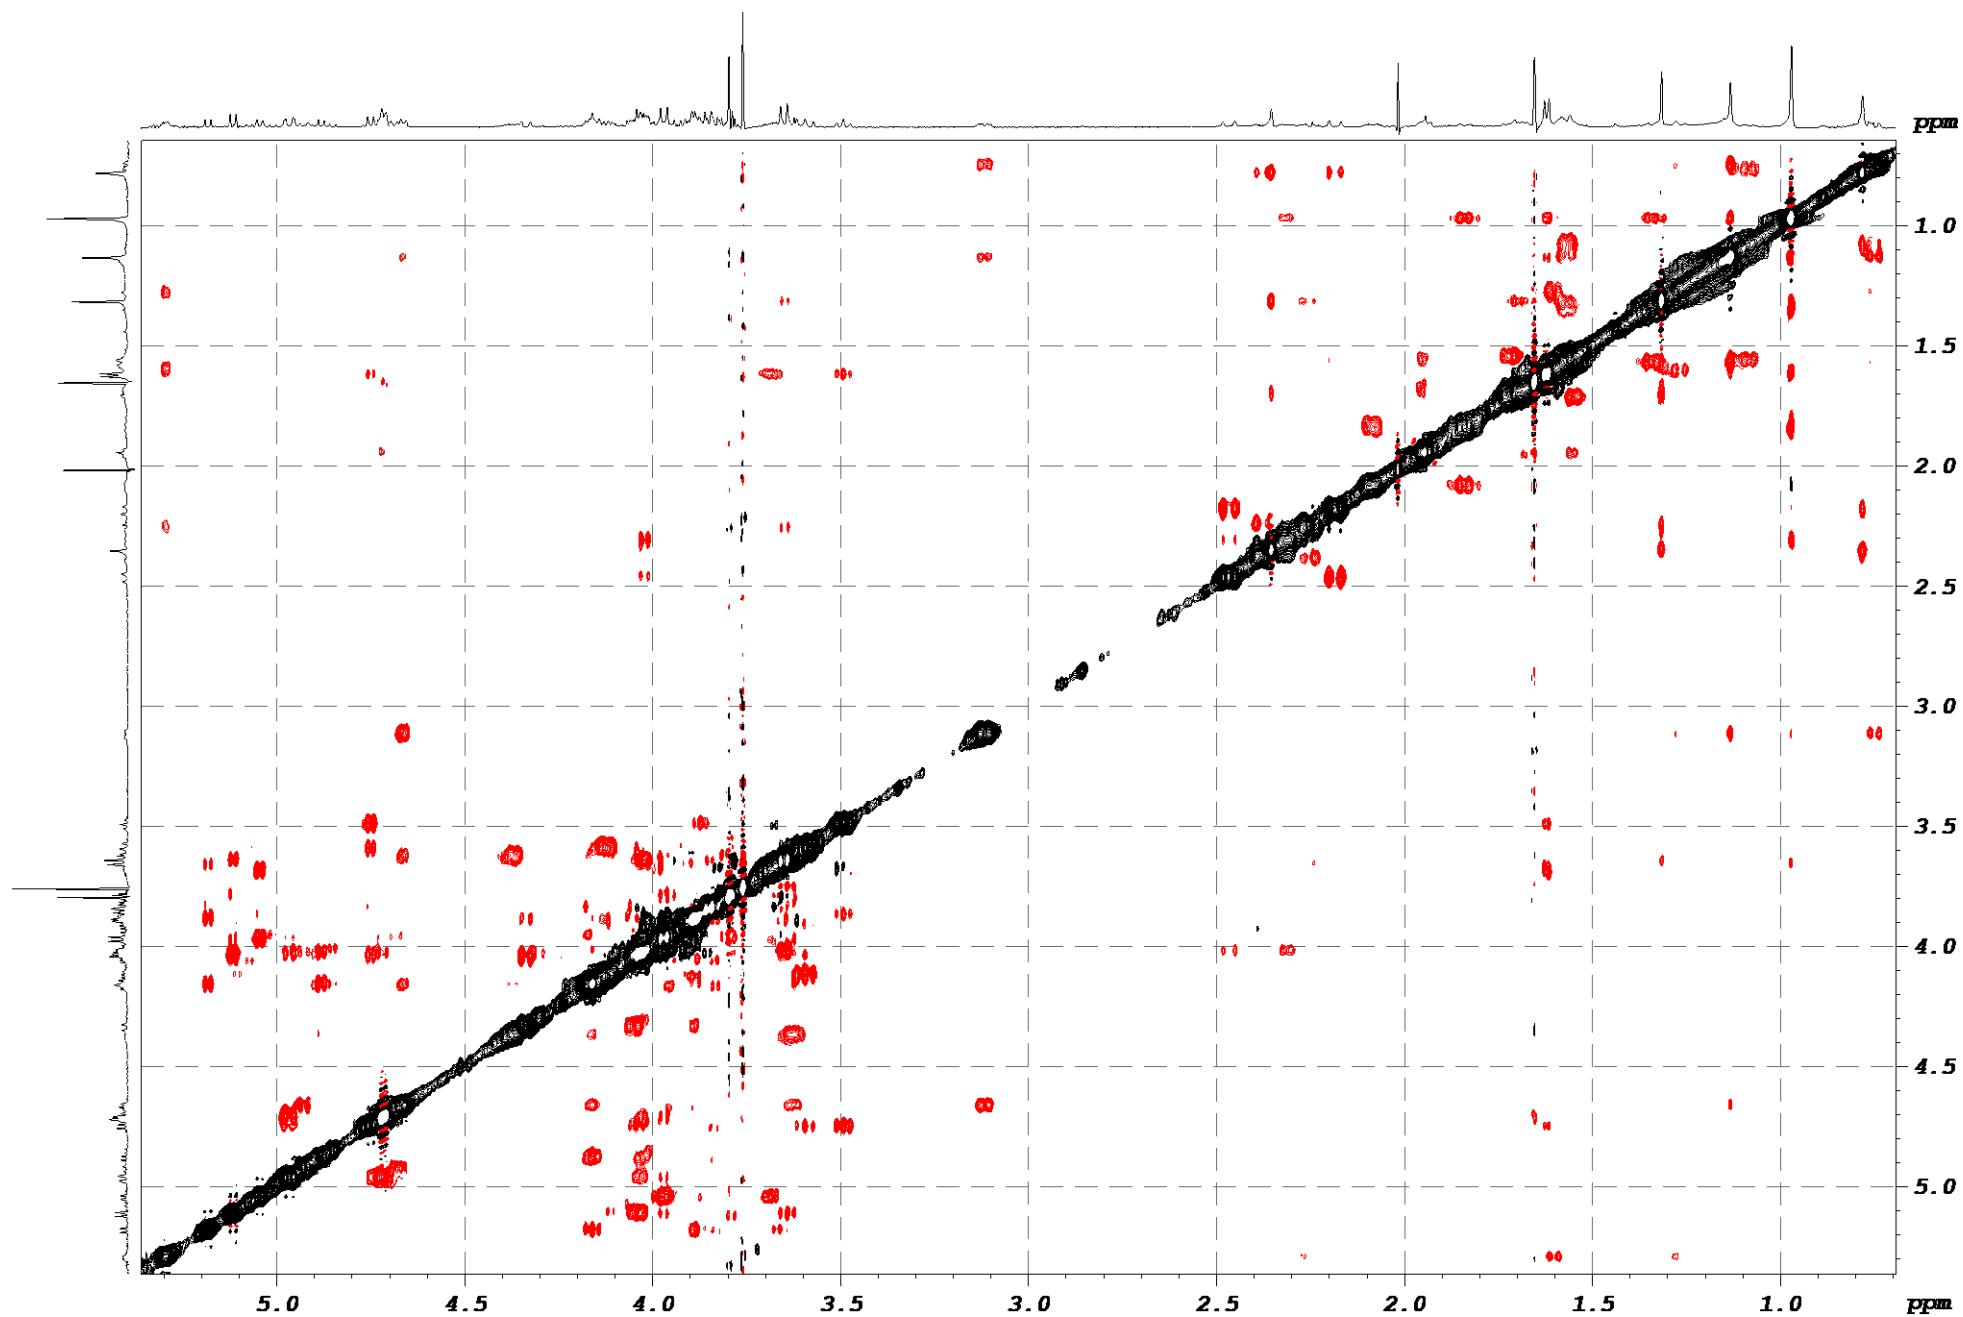

Figure S22. The ROESY (500.12 MHz) spectrum of chitonoidoside G (**3**) in  $C_5D_5N/D_2O$  (4/1)

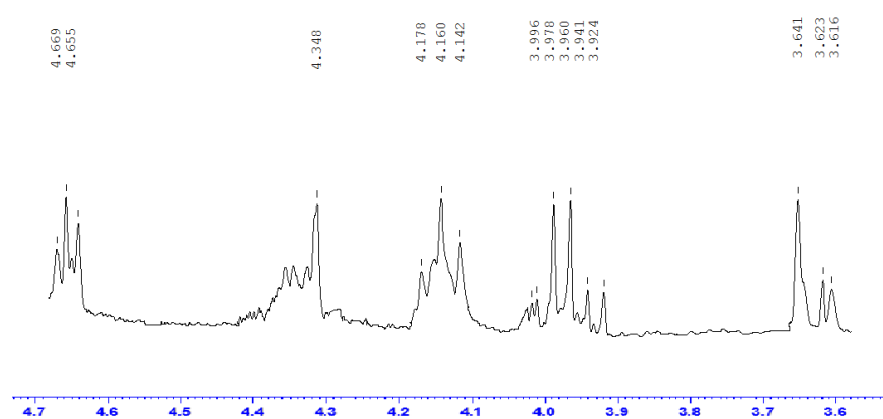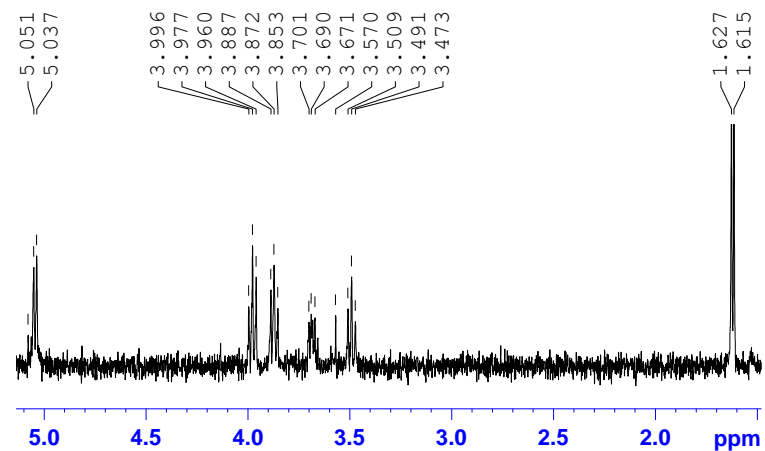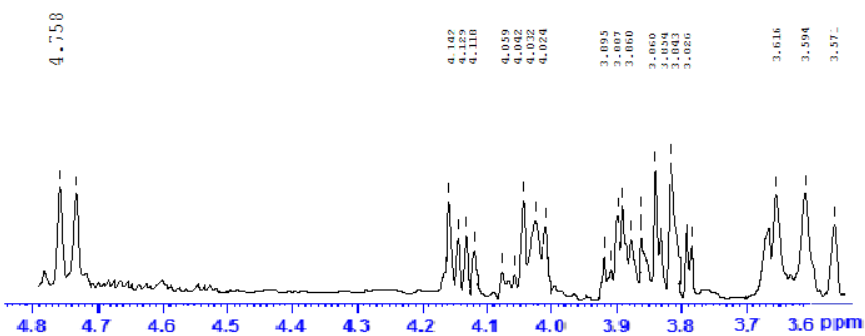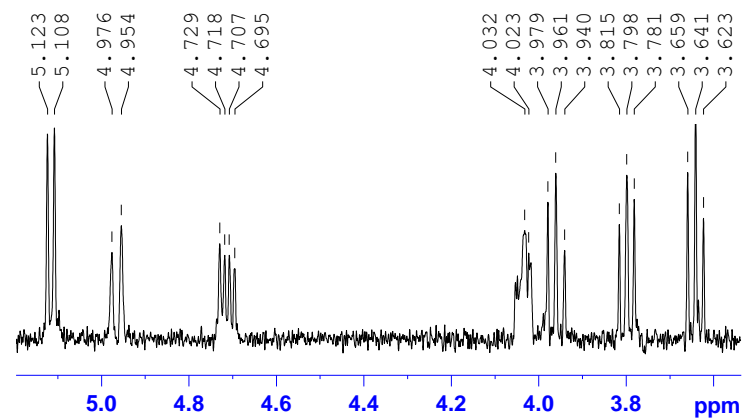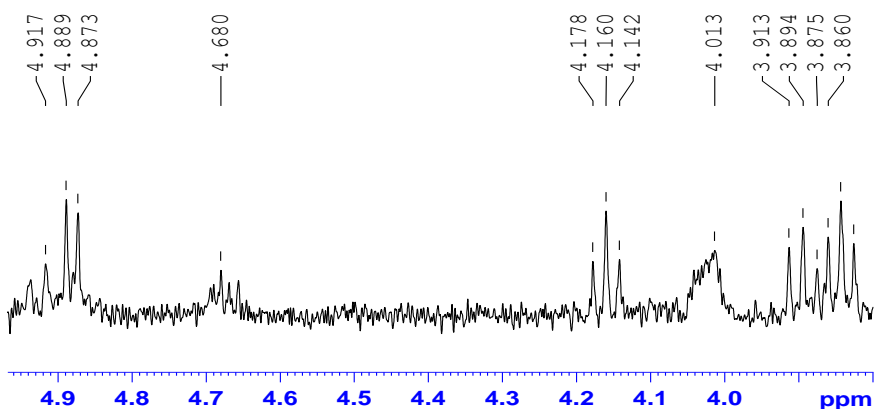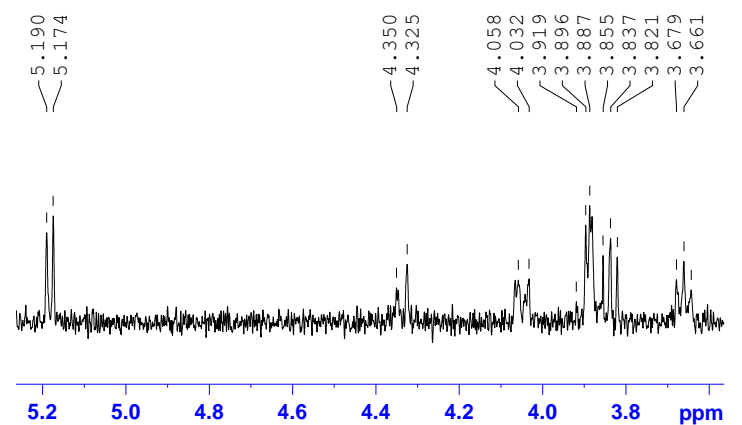

Figure S23. 1 D TOCSY (500.12 MHz) spectra of Xyl1, Qui2, Xyl3, MeGlc4, Glc5 and MeGlc6 of chitonoidoside G (**3**) in C<sub>5</sub>D<sub>5</sub>N/D<sub>2</sub>O (4/1)

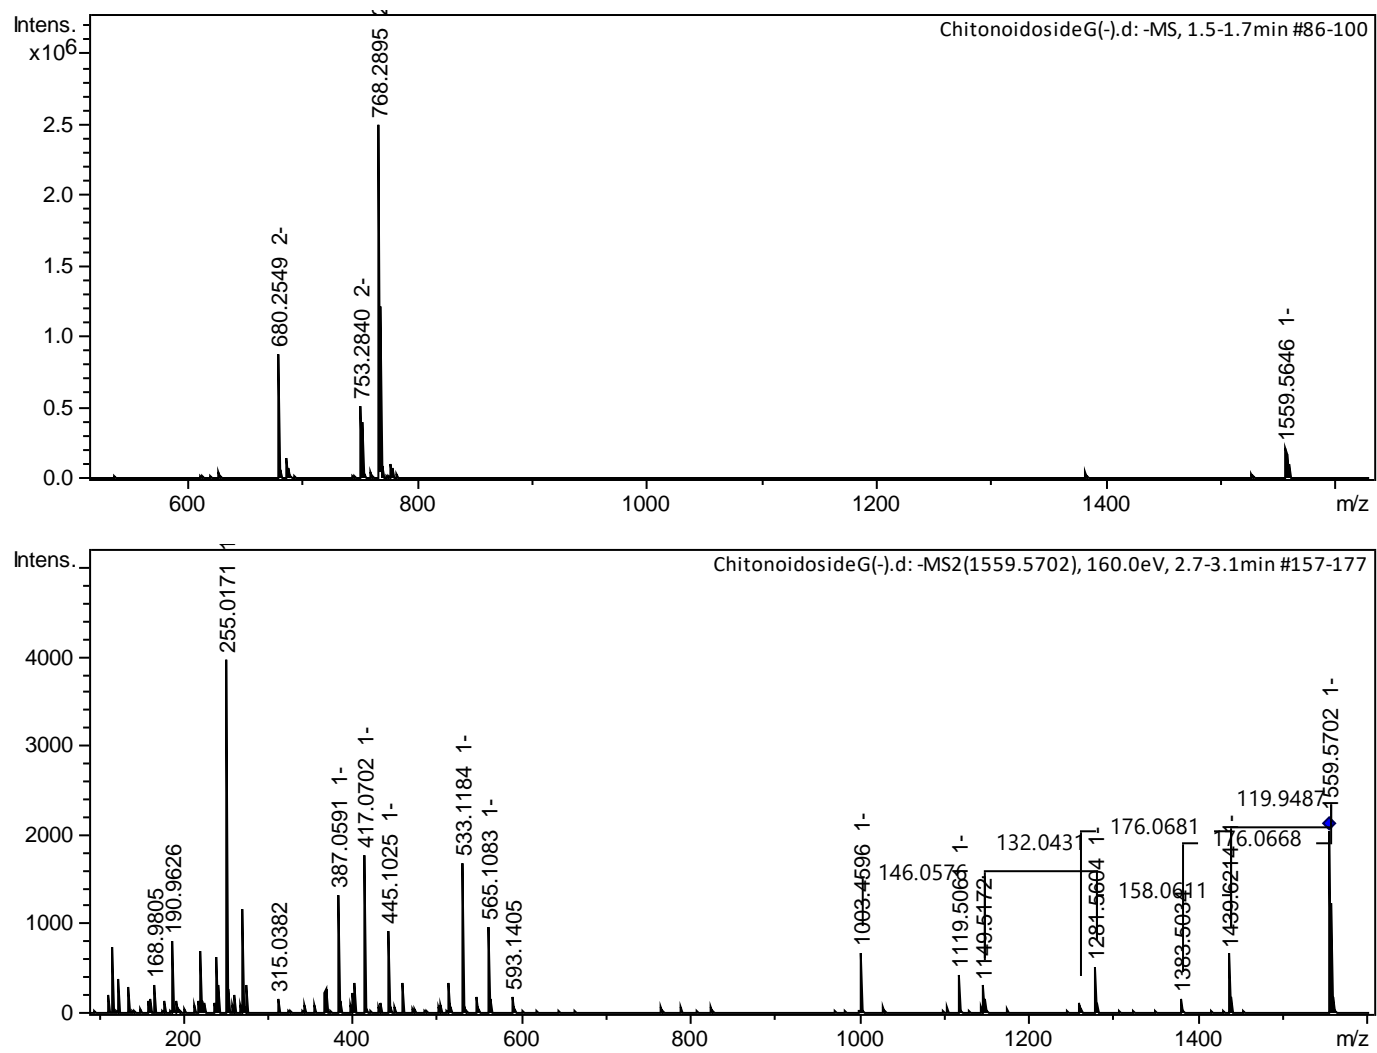

Figure S24. HR-ESI-MS and ESI-MS/MS spectra of chitonoidoside G (3)



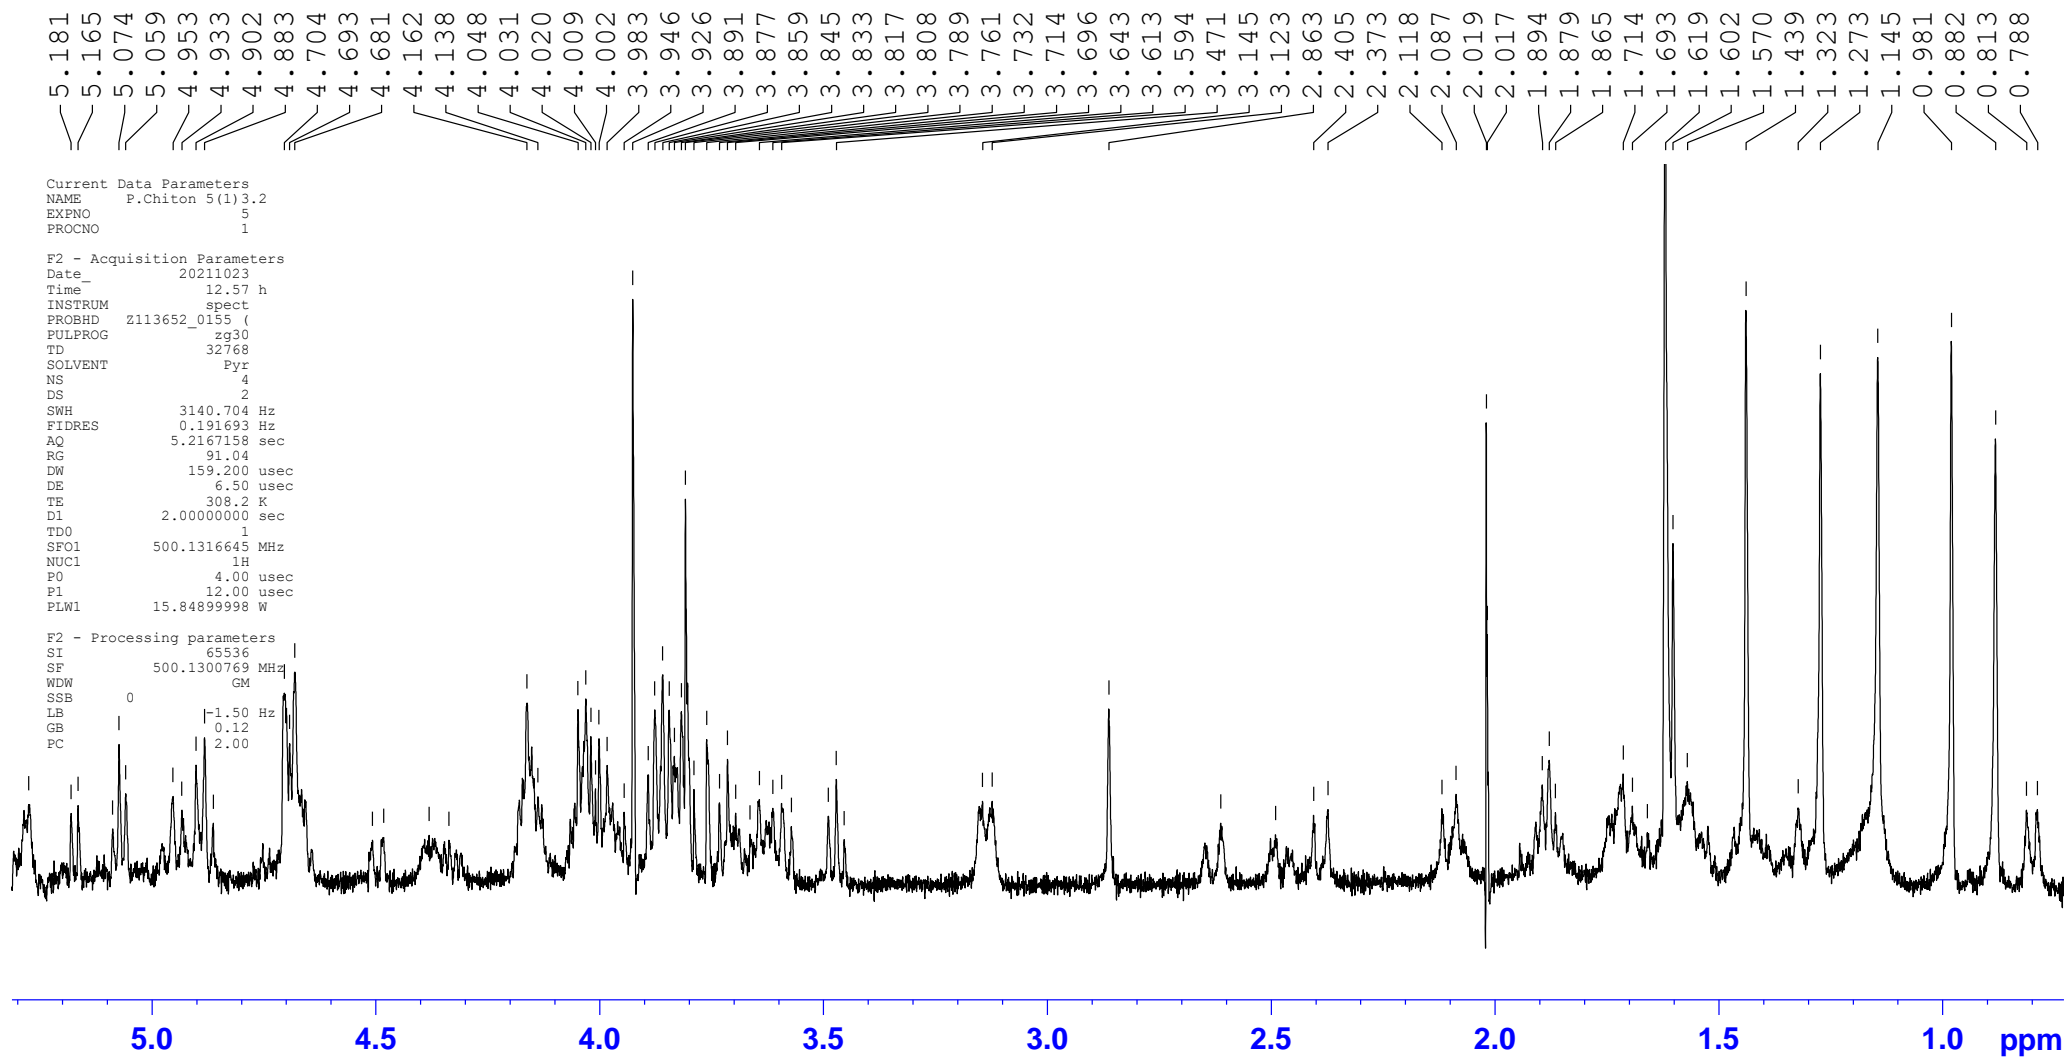

Figure S26. The  $^1\text{H}$  NMR (500.12 MHz) spectrum of chitonoidoside H (**4**) in  $\text{C}_5\text{D}_5\text{N}/\text{D}_2\text{O}$  (4/1)

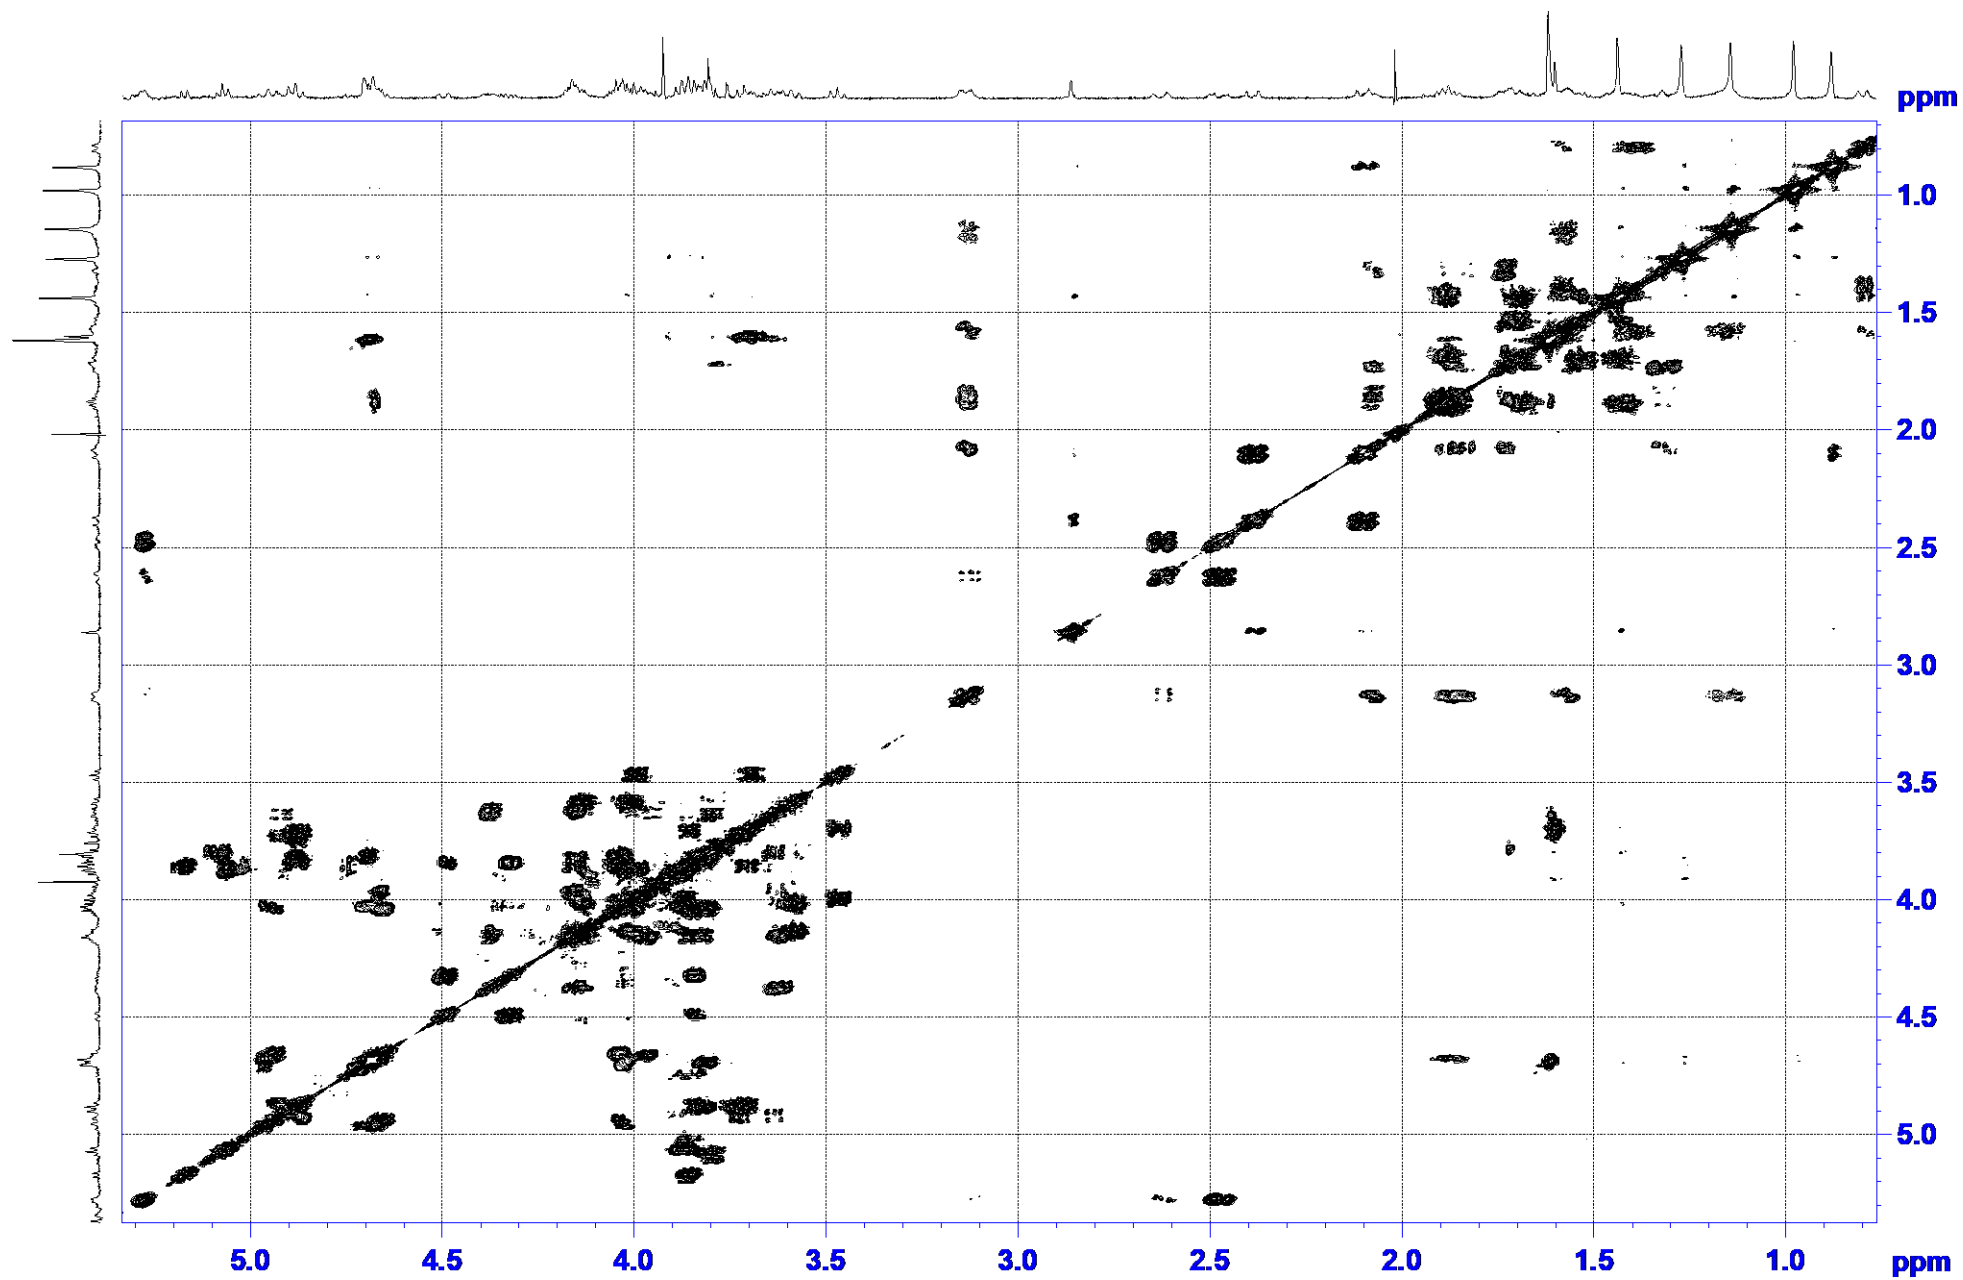

Figure S27. The COSY (500.12 MHz) spectrum of chitonoidoside H (**4**) in C<sub>5</sub>D<sub>5</sub>N/D<sub>2</sub>O (4/1)

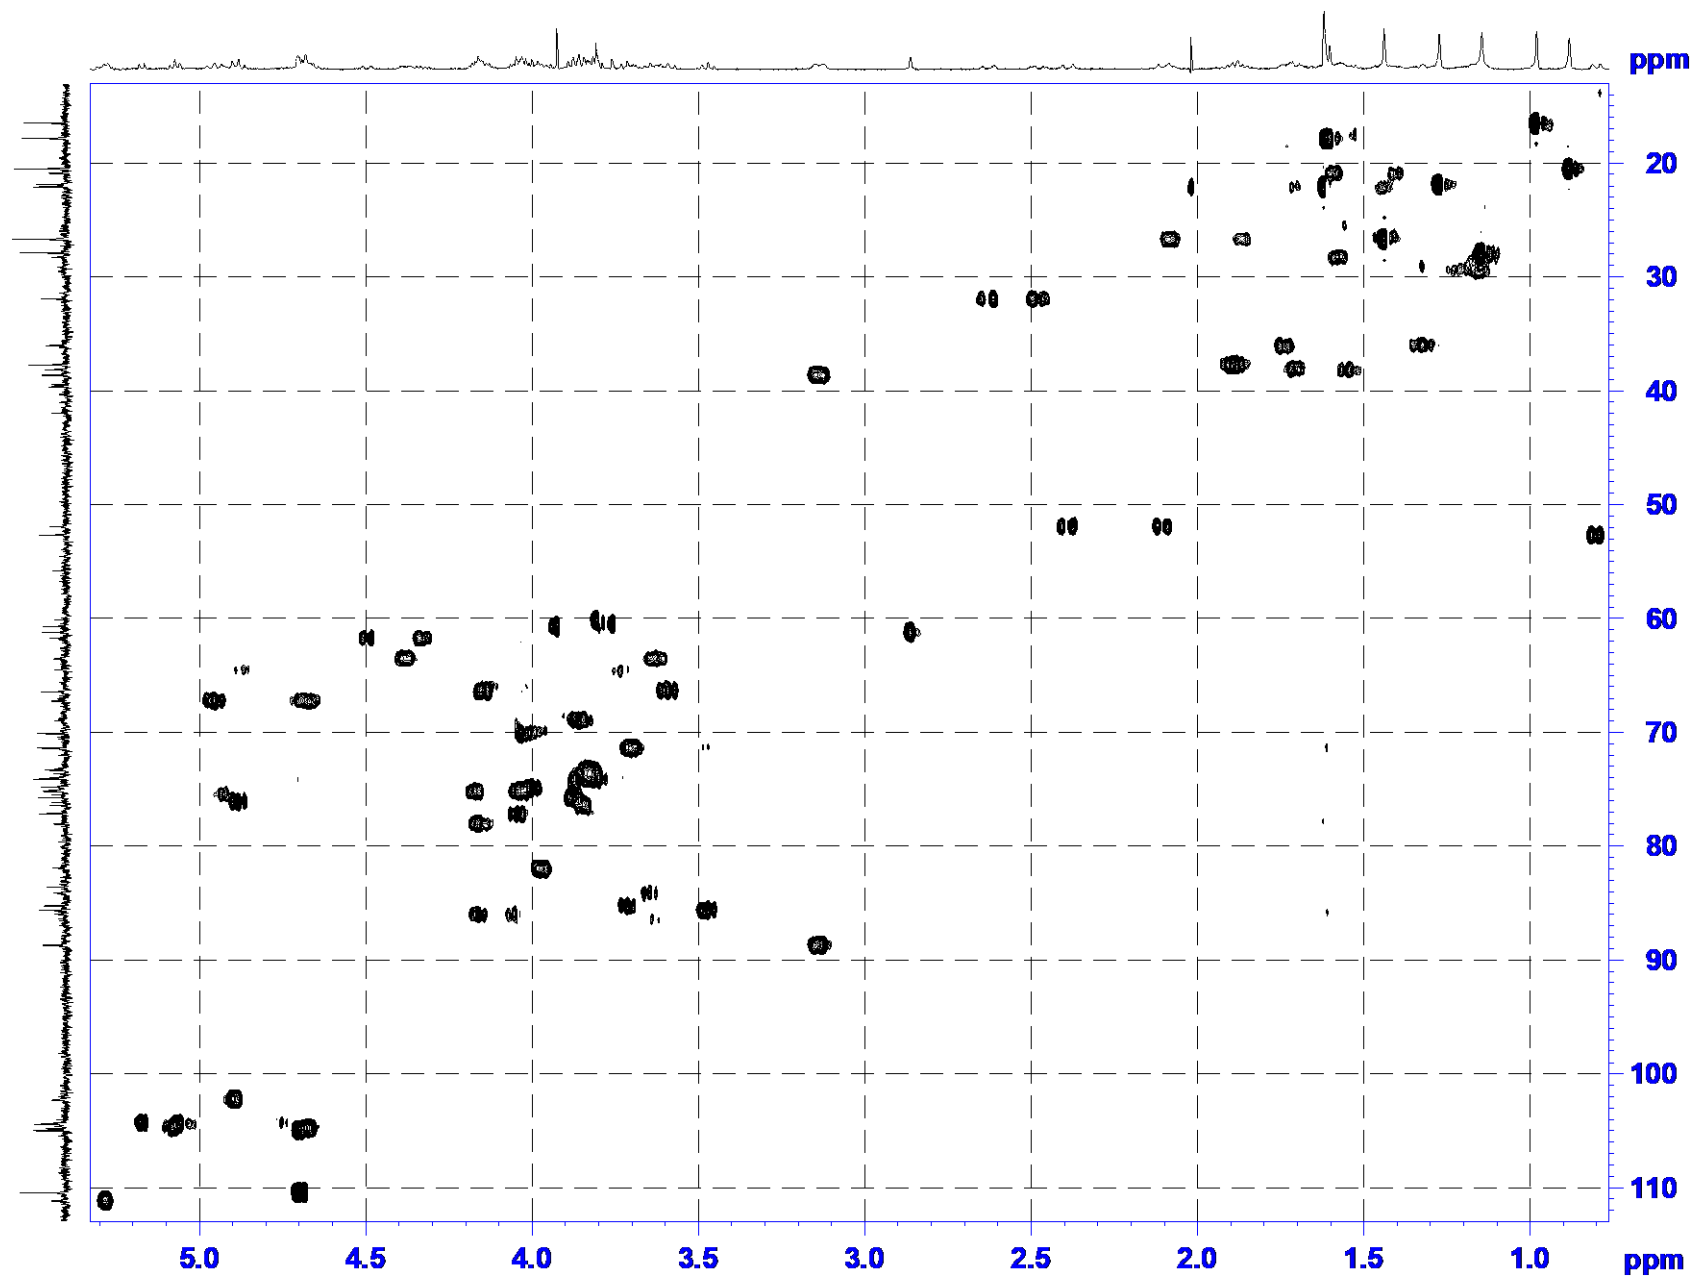

Figure S28. The HSQC (500.12 MHz) spectrum of chitonoidoside H (**4**) in  $\text{C}_5\text{D}_5\text{N}/\text{D}_2\text{O}$  (4/1)



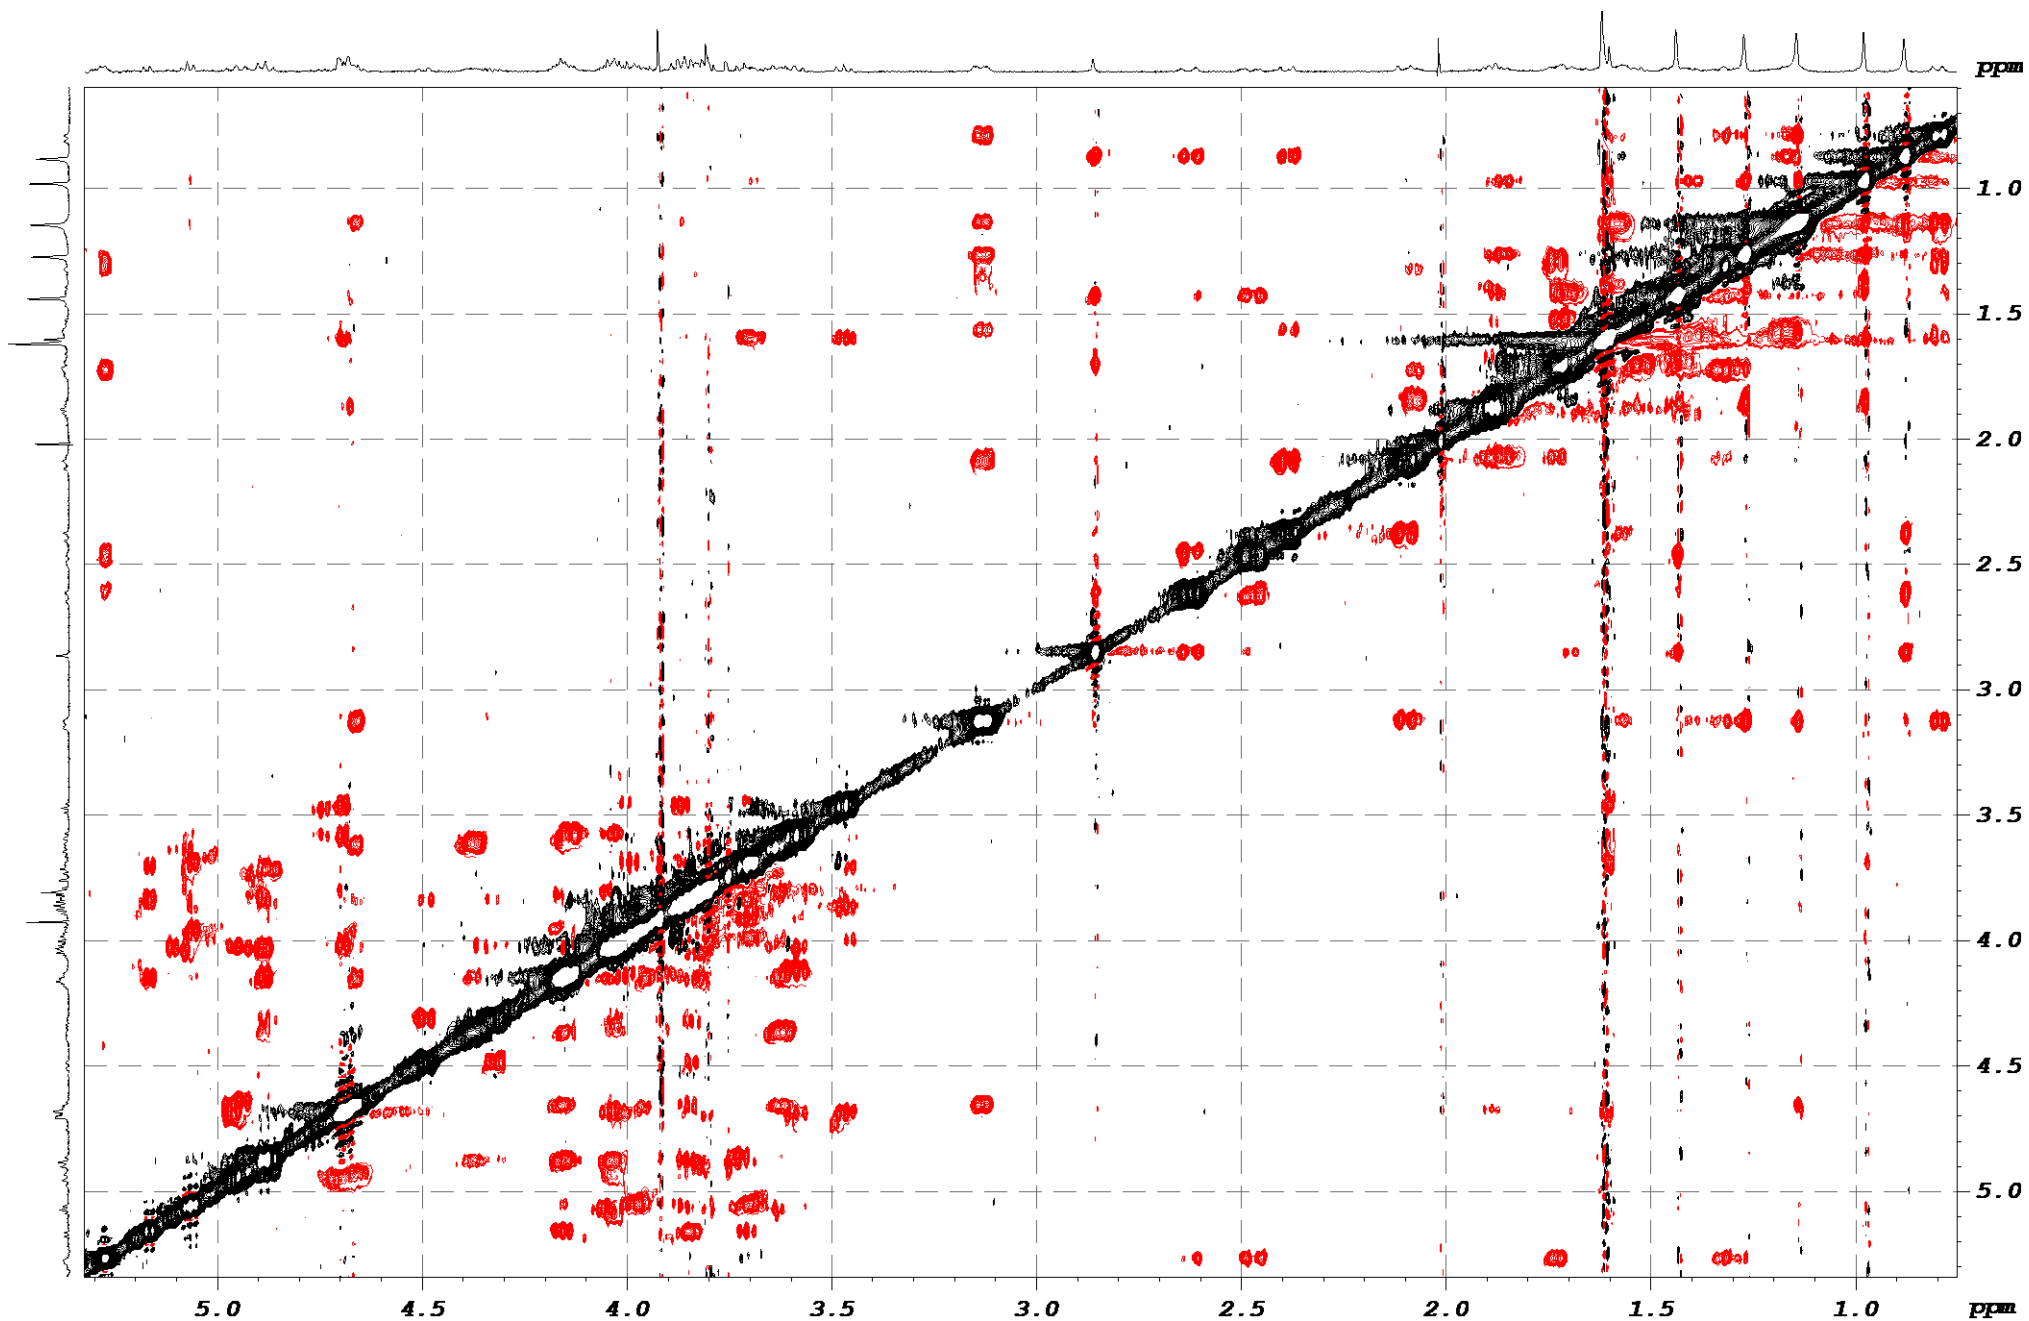

Figure S29. The ROESY (500.12 MHz) spectrum of chitonoidoside H (4) in  $\text{C}_5\text{D}_5\text{N}/\text{D}_2\text{O}$  (4/1)

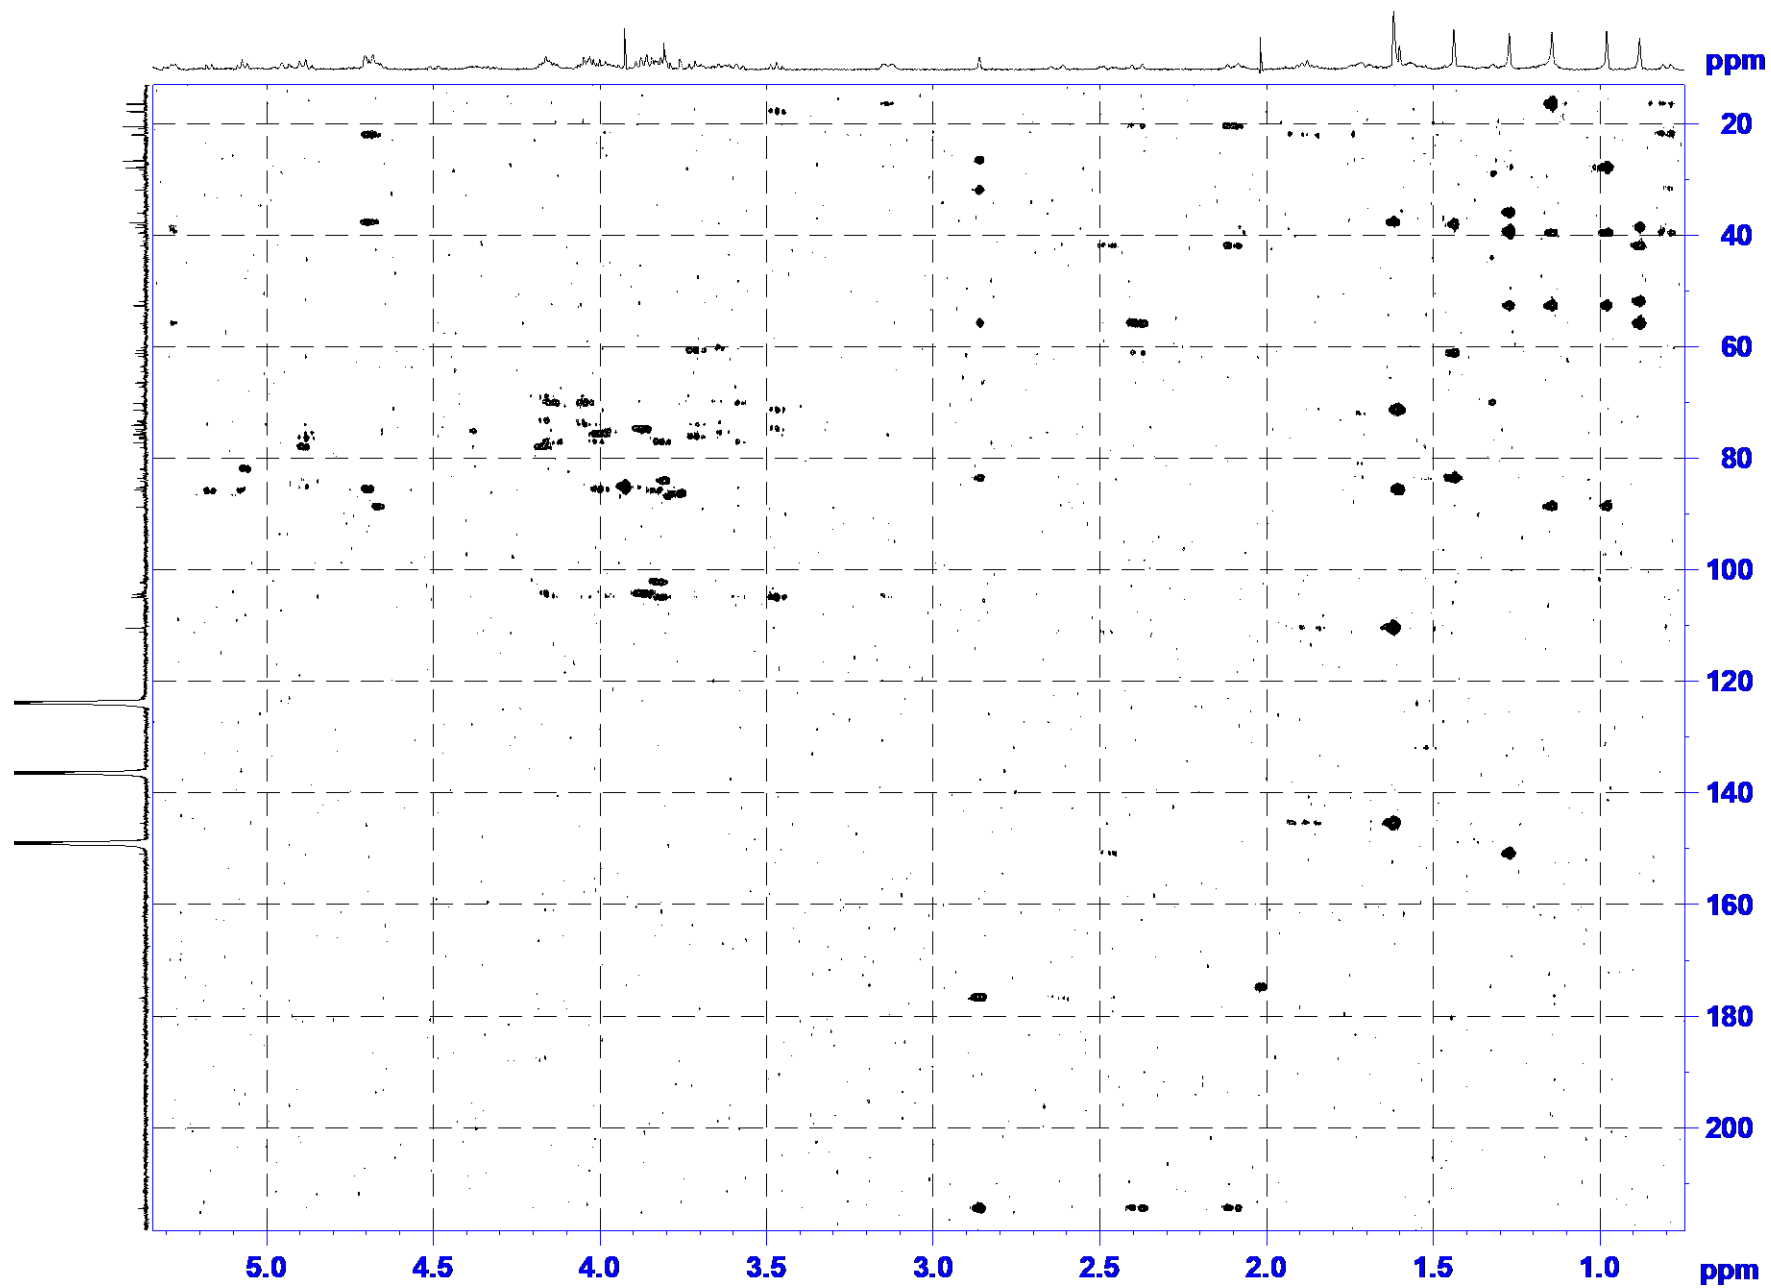

Figure S30. The HMBC (500.12 MHz) spectrum of chitonoidoside H (4) in  $\text{C}_5\text{D}_5\text{N}/\text{D}_2\text{O}$  (4/1)

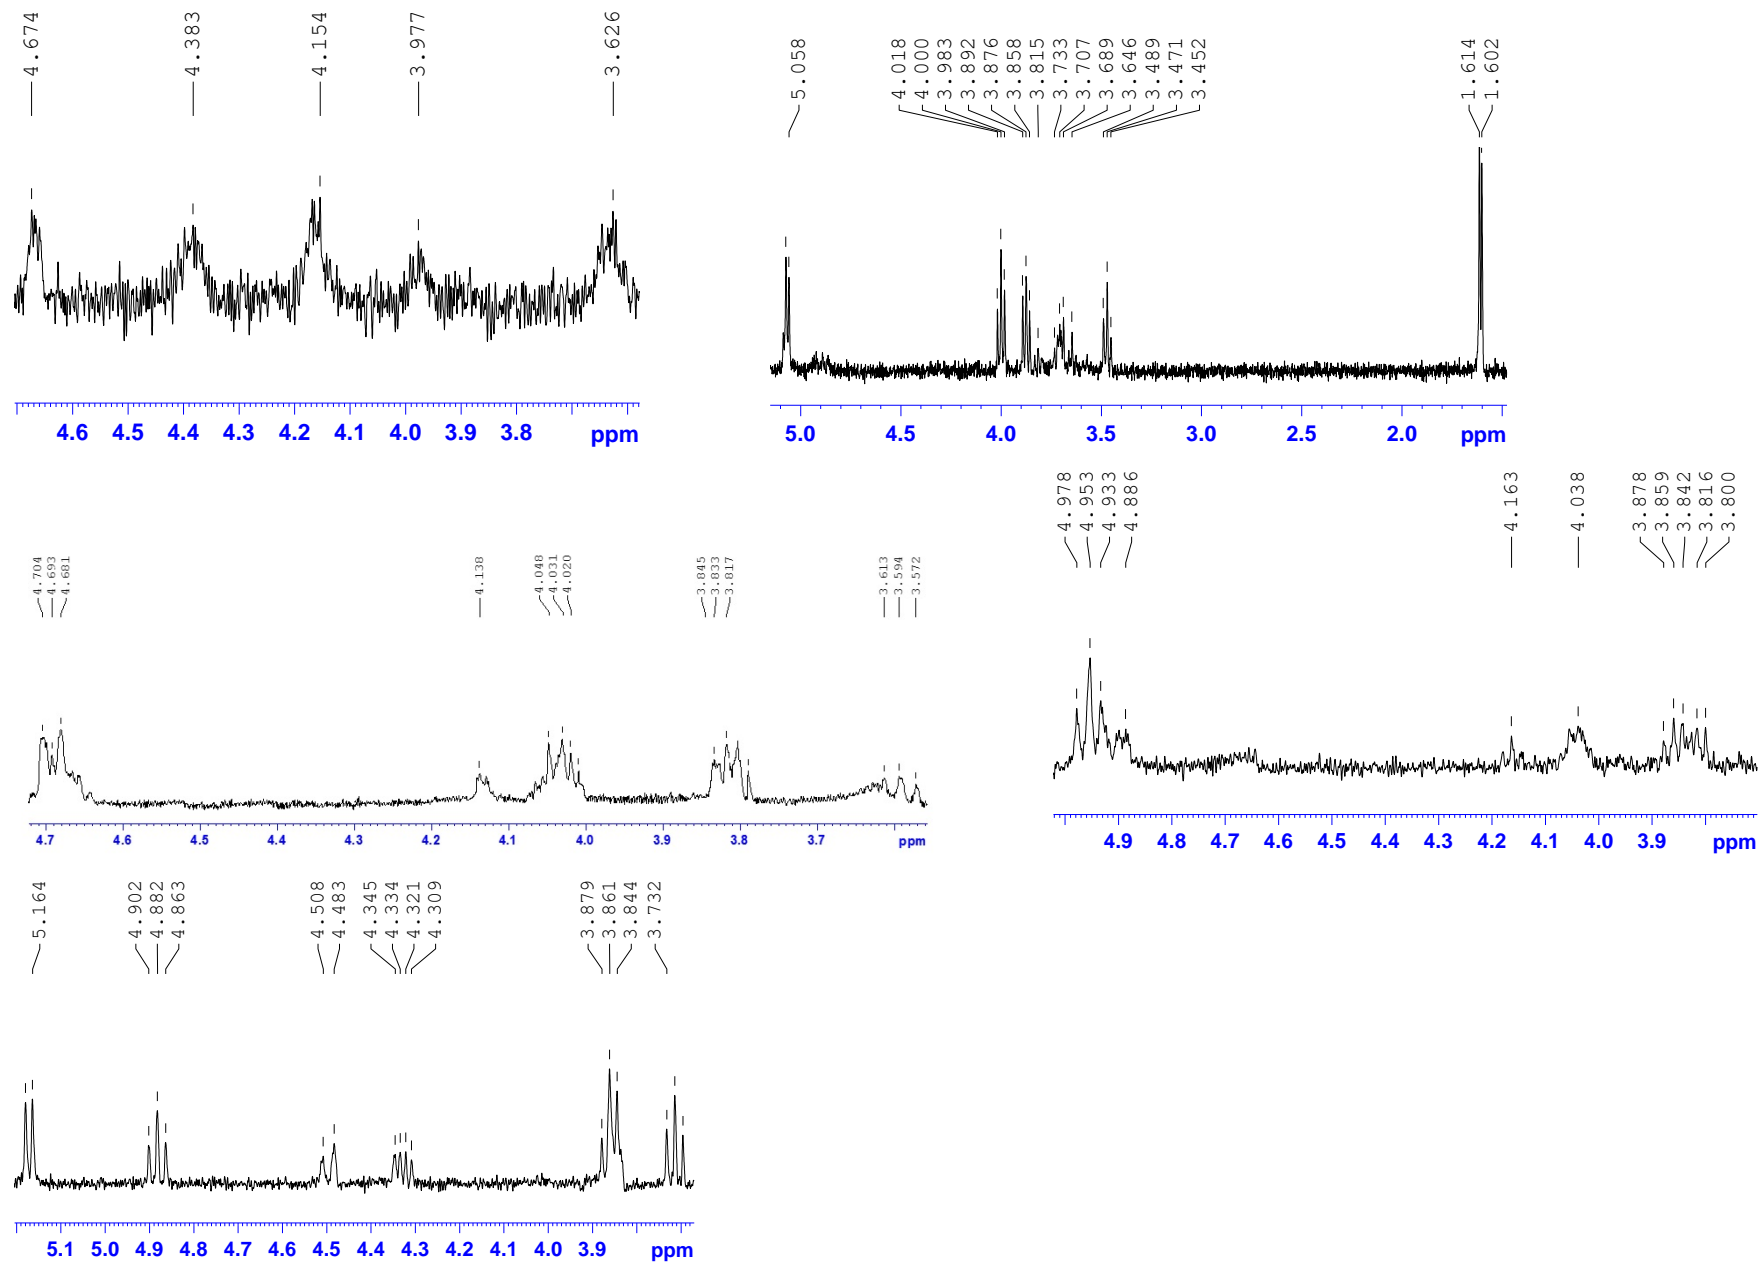

Figure S31. 1D TOCSY (500.12 MHz) spectra of Xyl1, Qui2, Xyl3, Glc4 and MeGlc5 of chitonoidoside H (**4**) in C<sub>5</sub>D<sub>5</sub>N/D<sub>2</sub>O (4/1)



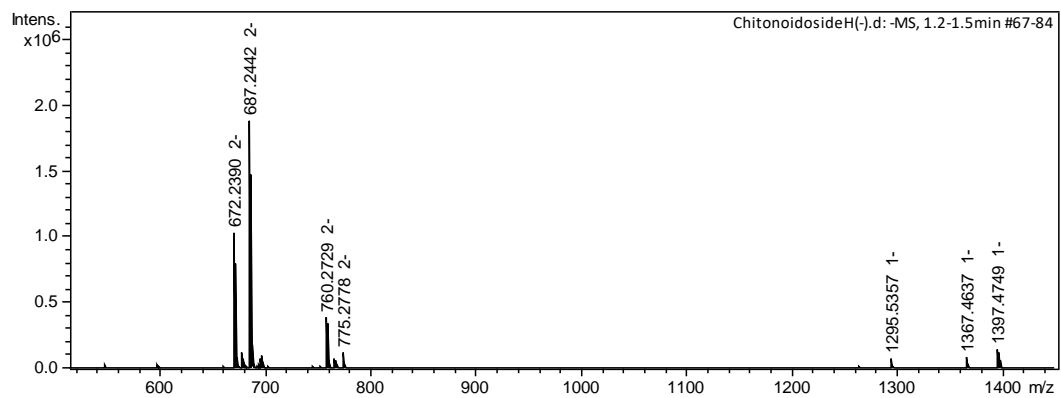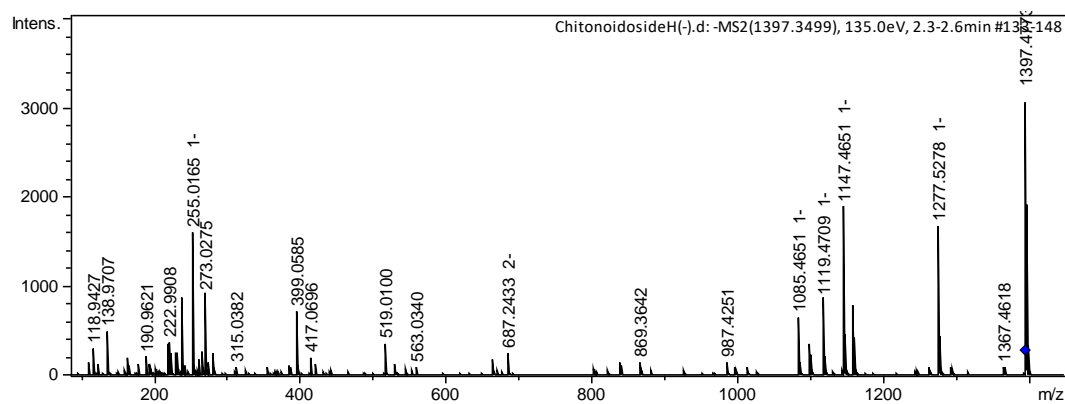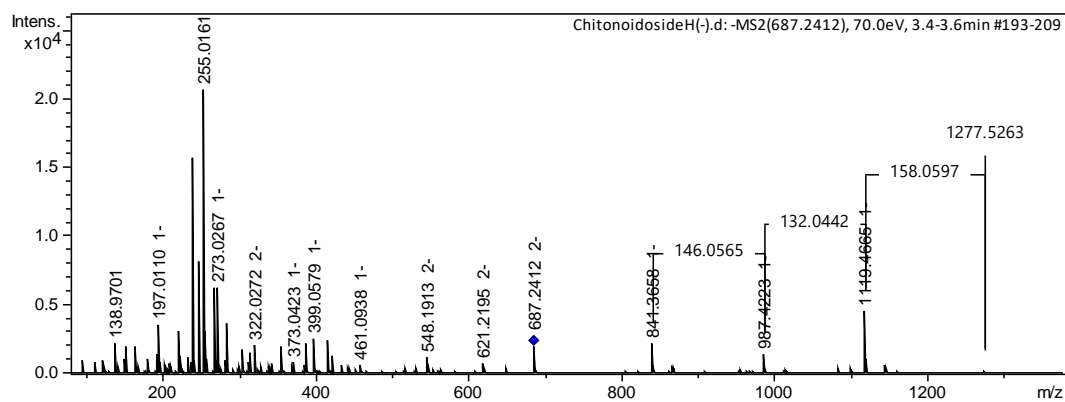

Figure S33. HR-ESI-MS and ESI-MS/MS spectra of chitonoidoside C (**4**)

**Table S3.** <sup>13</sup>C and <sup>1</sup>H NMR chemical shifts, HMBC and ROESY correlations of the aglycone moiety of chitonoidoside H (4).

| Position | $\delta_C$ mult. <sup>a</sup> | $\delta_H$ mult. (J in Hz) <sup>b</sup> | HMBC                      | ROESY                  |
|----------|-------------------------------|-----------------------------------------|---------------------------|------------------------|
| 1        | 36.0 CH <sub>2</sub>          | 1.74 m                                  |                           | H-11                   |
|          |                               | 1.32 m                                  |                           | H-11                   |
| 2        | 26.7 CH <sub>2</sub>          | 2.08 m                                  |                           |                        |
|          |                               | 1.87 m                                  |                           |                        |
| 3        | 88.7 CH                       | 3.14 dd (3.8; 11.9)                     | C: 4, 30, 31, C:1 Xyl1    | H-5, H-31, H1-Xyl1     |
| 4        | 39.5 C                        |                                         |                           |                        |
| 5        | 52.7 CH                       | 0.80 brd (11.0)                         | C: 6, 10, 30              | H-3, H-31              |
| 6        | 20.9 CH <sub>2</sub>          | 1.57 m                                  |                           | H-31                   |
|          |                               | 1.39 m                                  |                           |                        |
| 7        | 28.3 CH <sub>2</sub>          | 1.58 m                                  |                           |                        |
|          |                               | 1.10 m                                  |                           | H-32                   |
| 8        | 38.6 CH                       | 3.13 m                                  |                           | H-15, H-19             |
| 9        | 150.9 C                       |                                         |                           |                        |
| 10       | 39.7 C                        |                                         |                           |                        |
| 11       | 111.1 CH                      | 5.28 m                                  | C: 8, 13                  | H-1                    |
| 12       | 31.9 CH <sub>2</sub>          | 2.63 d (17.3)                           | C: 9, 13, 18              | H-17, H-32             |
|          |                               | 2.48 dd (5.5; 17.3)                     | C: 9, 11, 13, 14, 18      | H-21                   |
| 13       | 55.8 C                        |                                         |                           |                        |
| 14       | 42.0 C                        |                                         |                           |                        |
| 15       | 51.9 CH <sub>2</sub>          | 2.39 d (15.7)                           | C: 13, 16, 17, 32         | H-32                   |
|          |                               | 2.10 d (15.7)                           | C: 8, 14, 16, 32          | H-8                    |
| 16       | 214.5 C                       |                                         |                           |                        |
| 17       | 61.2 CH                       | 2.87 s                                  | C: 12, 13, 16, 18, 20, 21 | H-12, H-21, H-22, H-32 |
| 18       | 176.7 C                       |                                         |                           |                        |
| 19       | 21.9 CH <sub>3</sub>          | 1.27 s                                  | C: 1, 5, 9, 10            | H-1, H-2, H-8, H-30    |
| 20       | 83.6 C                        |                                         |                           |                        |
| 21       | 26.7 CH <sub>3</sub>          | 1.44 s                                  | C: 17, 20, 22             | H-12, H-17             |
| 22       | 38.1 CH <sub>2</sub>          | 1.70 m                                  | C: 20, 21, 23             |                        |
|          |                               | 1.54 m                                  | C: 20, 21                 |                        |
| 23       | 22.1 CH <sub>2</sub>          | 1.70 m                                  |                           |                        |
|          |                               | 1.44 m                                  |                           |                        |
| 24       | 37.7 CH <sub>2</sub>          | 1.89 m                                  | C: 23, 25, 26, 27         |                        |
| 25       | 145.5 C                       |                                         |                           |                        |
| 26       | 110.4 CH <sub>2</sub>         | 4.71 brs                                | C: 24, 27                 |                        |
|          |                               | 4.68 brs                                | C: 24, 27                 |                        |
| 27       | 22.0 CH <sub>3</sub>          | 1.62 s                                  | C: 24, 25, 26             |                        |
| 30       | 16.5 CH <sub>3</sub>          | 0.98 s                                  | C: 3, 4, 5, 31            | H-31                   |
| 31       | 27.9 CH <sub>3</sub>          | 1.15 s                                  | C: 3, 4, 5, 30            | H-3, H-5, H-30         |
| 32       | 20.5 CH <sub>3</sub>          | 0.88 s                                  | C: 8, 13, 14, 15          | H-7, H-12, H-17        |

<sup>a</sup>Recorded at 125.67 MHz in C<sub>5</sub>D<sub>5</sub>N/D<sub>2</sub>O (4/1). <sup>b</sup>Recorded at 500.12 MHz in C<sub>5</sub>D<sub>5</sub>N/D<sub>2</sub>O (4/1).
